# Supplementary material for: Absolute risk of tuberculosis among untreated populations with a positive tuberculin skin test or interferon-gamma release assay result: systematic review and meta-analysis
Source: PubMed Central journal article supplement — BMJ. 2020 Mar 10;368:m549. doi: 10.1136/bmj.m549 (PMC7190060; doi:10.1136/bmj.m549), 2020-03-10
Supplement: camj052371.ww1.pdf [file camj052371.ww1.pdf]

# SUPPLEMENTAL MATERIAL

## Table of Contents

|                                                                                                                                     |    |
|-------------------------------------------------------------------------------------------------------------------------------------|----|
| Supplemental Figures .....                                                                                                          | 2  |
| Supplemental Figure 1. PRISMA Flow Diagram.....                                                                                     | 2  |
| Supplemental Figure 2. Forest Plot of TB Incidence per 1000 person-years among both close and casual contacts .....                 | 3  |
| Supplemental Figure 3. Forest Plot of the incidence rate ratio between close and casual contacts .....                              | 4  |
| Supplemental Figure 4. Forest Plot of TB Incidence per 1000 person-years among people living with HIV. ....                         | 5  |
| Supplemental Figure 5. Forest Plot of the incidence rate ratio between people living with HIV.....                                  | 6  |
| Supplemental Tables.....                                                                                                            | 7  |
| Table S1. MEDLINE Search .....                                                                                                      | 7  |
| Table S2. EMBASE Search.....                                                                                                        | 8  |
| Table S3. CENTRAL Search.....                                                                                                       | 9  |
| Table S4. Fields Extracted from Included Studies .....                                                                              | 10 |
| Table S5. QUADAS-2 adapted quality assessment criteria .....                                                                        | 11 |
| Table S6. Characteristics of Included Studies .....                                                                                 | 12 |
| Table S7. Detailed Individual Study Characteristics .....                                                                           | 13 |
| Table S8. Information on LTBI Treatment Provided within Included Studies.....                                                       | 20 |
| Table S9. Study Characteristics and Outcomes Among Test-Positive Persons .....                                                      | 25 |
| Table S10. TB risk stratified by method of follow-up: active vs. passive .....                                                      | 31 |
| Table S11. TB risk stratified by mean/median duration of follow-up: $\leq 24$ months vs. $> 24$ months.....                         | 32 |
| Table S12. TB risk stratified by TB incidence in country of study: $< 30$ per 100,000 vs. $\geq 30$ per 100,000 .....               | 33 |
| Table S13. TB risk stratified by study quality: high vs. moderate vs. low.....                                                      | 34 |
| Table S14. TB risk stratified by study design: prospective cohort vs. retrospective cohort .....                                    | 35 |
| Table S15. TB risk stratified by year of study start: 2005 or earlier vs. 2006 or later .....                                       | 36 |
| Table S16. TB risk stratified by country-level income: high-income vs. low, low-middle, or upper-middle income .....                | 37 |
| Table S17. TB risk stratified by TB diagnosis method: microbiological only vs. microbiological and clinical vs. not specified ..... | 38 |
| Table S18. TB risk stratified by proportion of patients excluded due to treatment: $< 20\%$ vs. $\geq 20\%$ .....                   | 39 |
| Table S19. TB risk stratified by country-level BCG vaccination policy: none or at birth vs. multiple or post-infancy .....          | 40 |
| Table S20. Summary of risk of TB per 1000 PY and incidence rate ratios .....                                                        | 41 |
| Table S21. TB Risk Among Populations with Concordant or Discordant Test Results .....                                               | 42 |
| Table S22. TB Risk Among Populations with TB Exposure .....                                                                         | 44 |
| Table S23. TB Risk Among Populations with Conditions Affecting Immunity.....                                                        | 46 |
| Table S24. TB Risk Among Populations with Characteristics That May Impact Exposure and Immunity.....                                | 48 |
| Supplemental Content S1. Additional Information .....                                                                               | 50 |
| Populations Considered At-Risk in This Review, <i>a priori</i> .....                                                                | 50 |
| Classifying Populations into At-Risk Populations .....                                                                              | 50 |
| Supplemental Information for Tables Included in the Manuscript.....                                                                 | 50 |
| References .....                                                                                                                    | 53 |

## Supplemental Figures

**Supplemental Figure 1. PRISMA Flow Diagram.** The diagram is for the identified and ultimately included studies within the systematic review. The (\*) indicates studies were excluded because they were done in people living with HIV in countries with an annual TB incidence >100 per 100,000 population, or studies were done in countries with a population HIV-prevalence >5% and people living with HIV were not reported separately or excluded from the study.

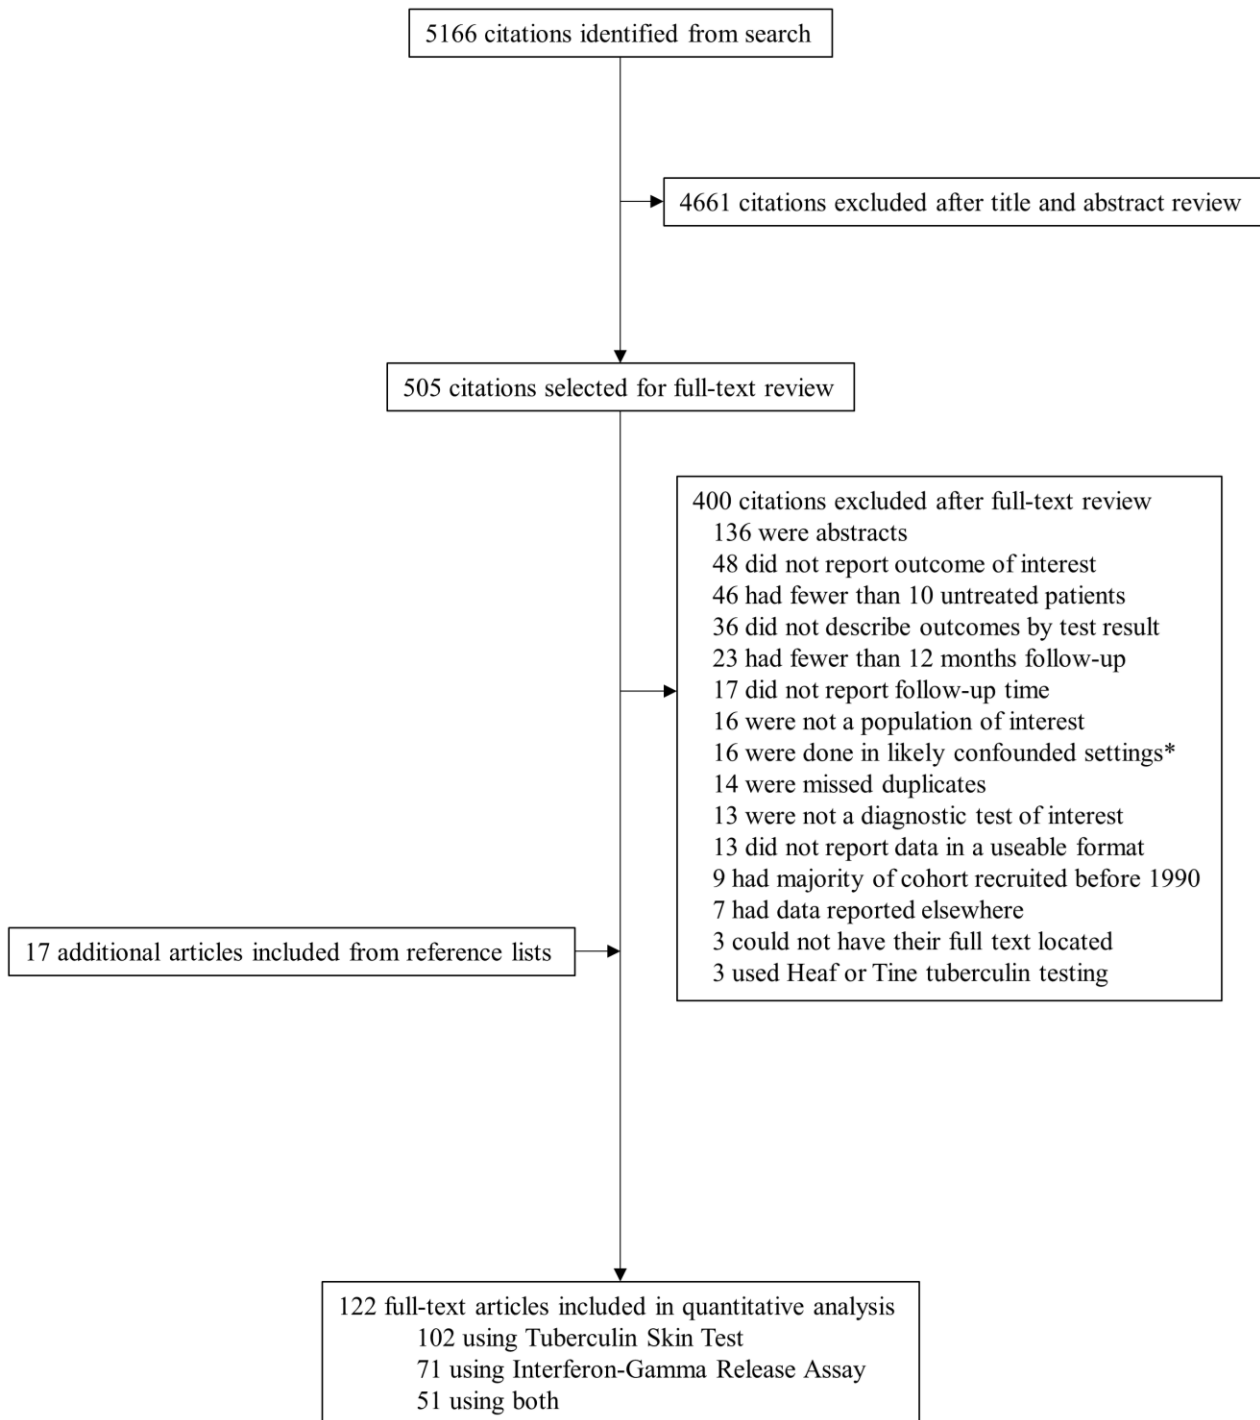

**Supplemental Figure 2A.** Forest Plot of TB Incidence per 1000 person-years among both close and casual contacts who are IGRA-positive.

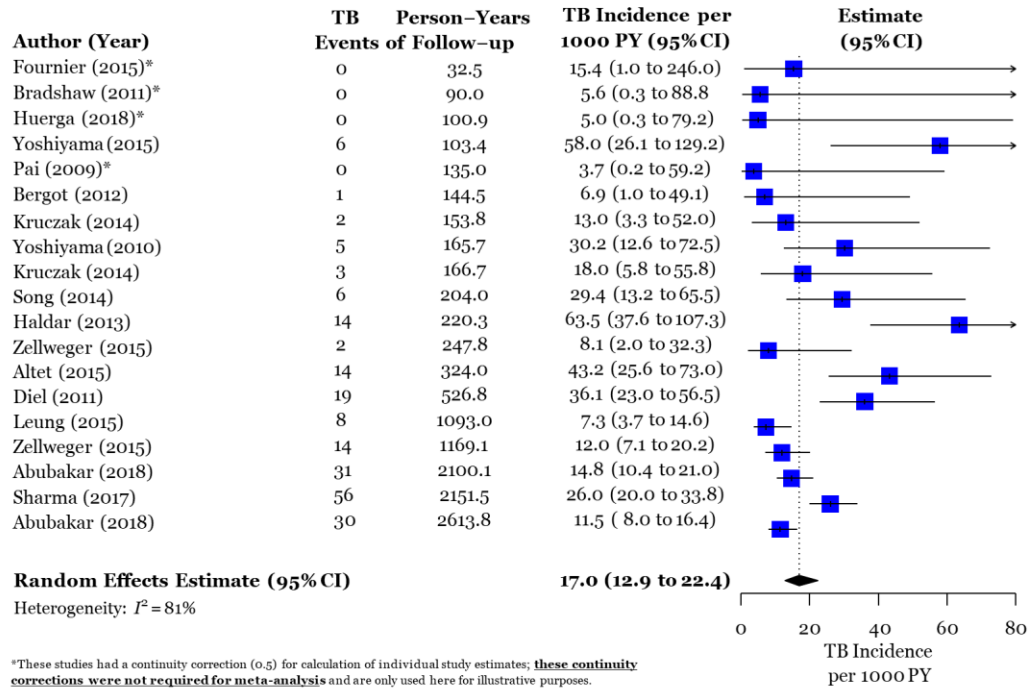

**Supplemental Figure 2B.** Forest Plot of TB Incidence per 1000 person-years among both close and casual contacts who have TST  $\geq 5$ mm.

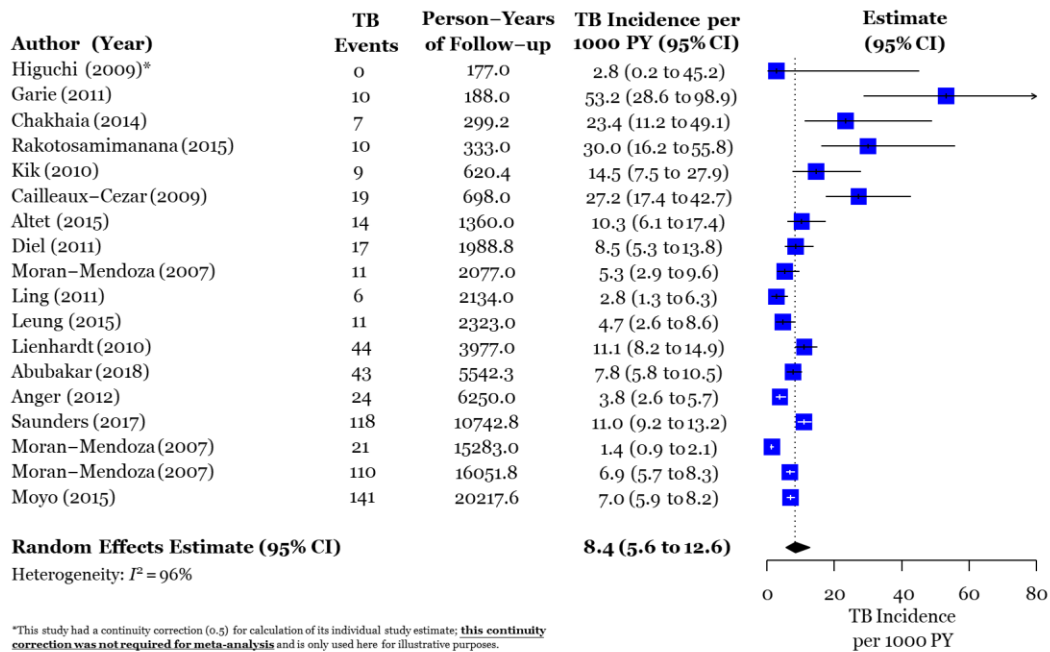

**Supplemental Figure 3A.** Forest Plot of the incidence rate ratio between close/casual contacts who had a positive-IGRA and a negative-IGRA.

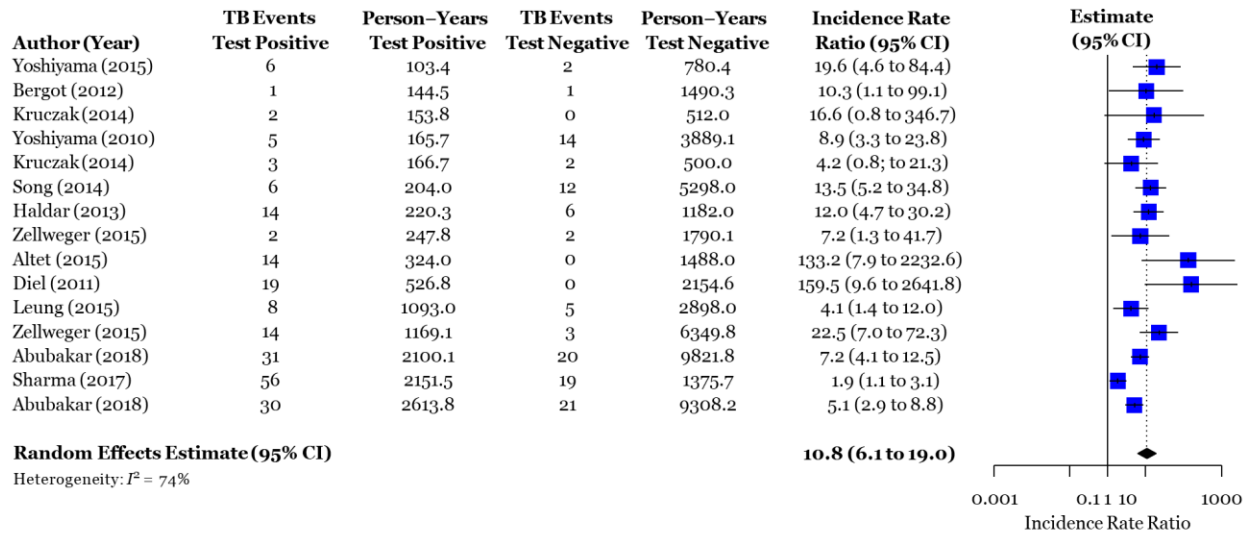

**Supplemental Figure 3B.** Forest Plot of the incidence rate ratio between close/casual contacts who had TST  $\geq 5$ mm and TST  $< 5$ mm.

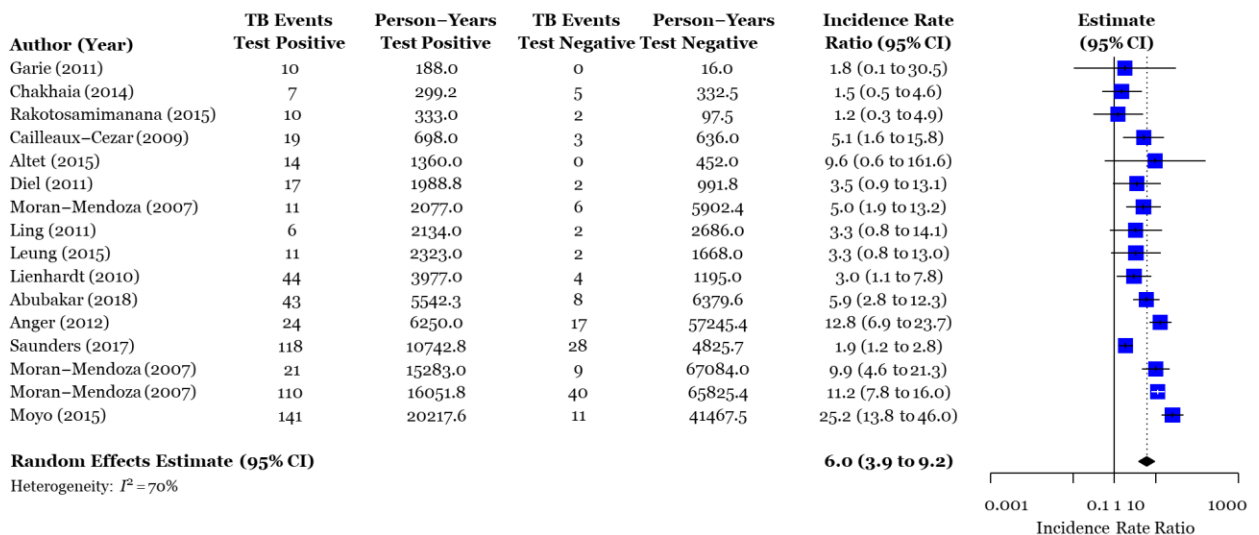

**Supplemental Figure 4A.** Forest Plot of TB Incidence per 1000 person-years among people living with HIV who are IGRA-positive.

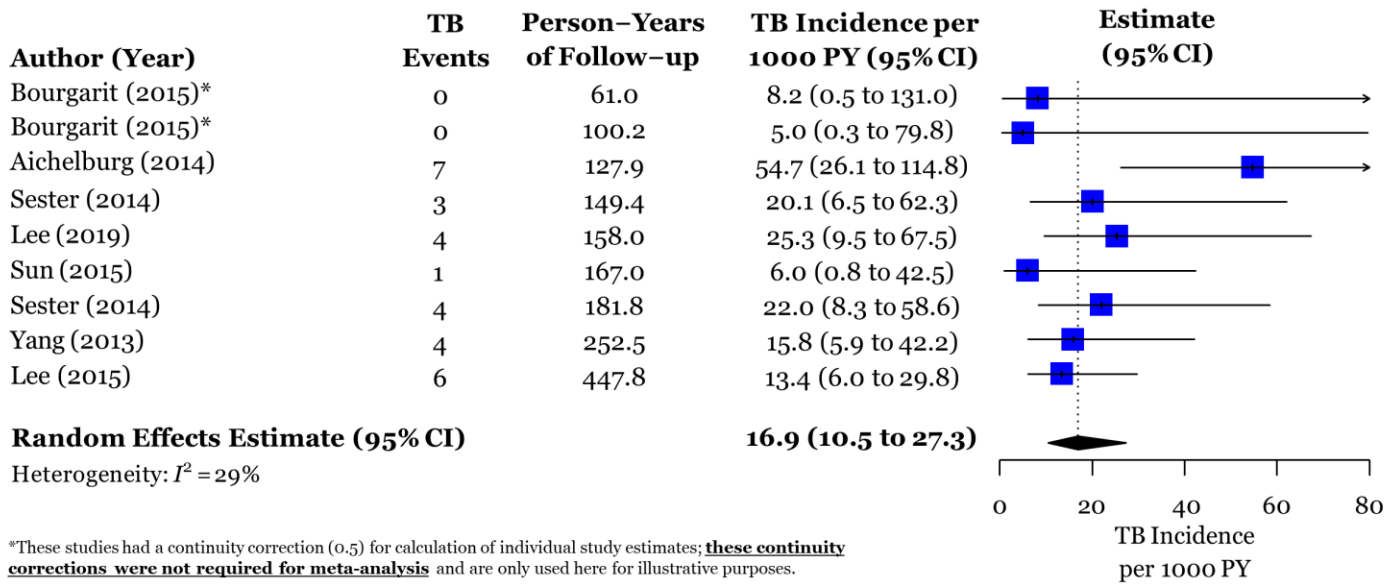

**Supplemental Figure 4B.** Forest Plot of TB Incidence per 1000 person-years among people living with HIV who have TST  $\geq 5$ mm.

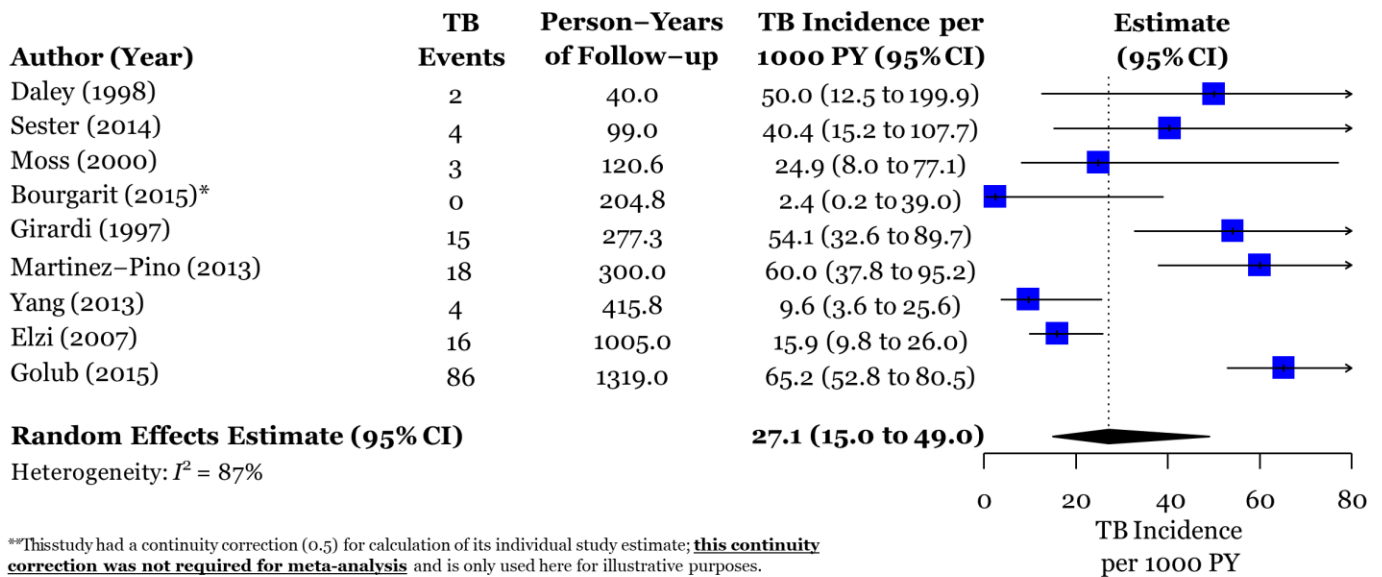

**Supplemental Figure 5A.** Forest Plot of the incidence rate ratio between people living with HIV who had a positive-IGRA and a negative-IGRA.

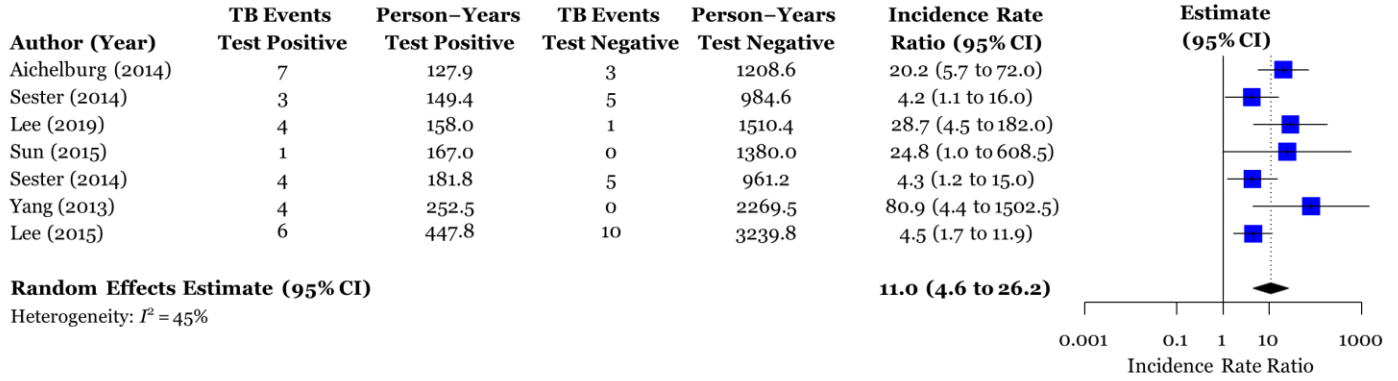

**Supplemental Figure 5B.** Forest Plot of the incidence rate ratio between people living with HIV who had TST  $\geq 5$ mm and TST  $< 5$ mm.

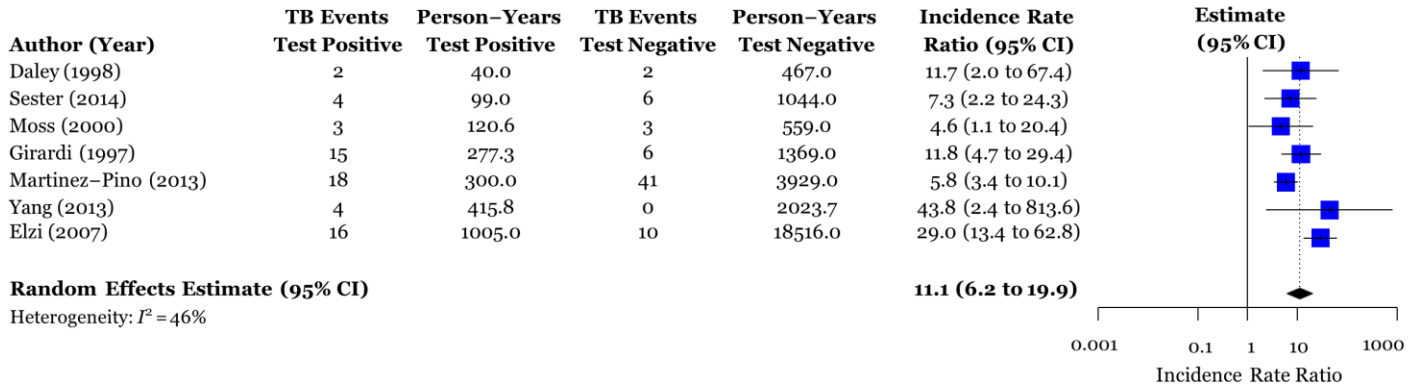

## Supplemental Tables

Table S1. MEDLINE Search

| Search Number | Term                                                                                                                 |
|---------------|----------------------------------------------------------------------------------------------------------------------|
| 1             | (laten* adj3 (tb* or tubercul*)).tw.                                                                                 |
| 2             | ltb*.tw.                                                                                                             |
| 3             | tb.tw.                                                                                                               |
| 4             | tubercul*.tw.                                                                                                        |
| 5             | Tuberculosis/                                                                                                        |
| 6             | latent tuberculosis infection.tw.                                                                                    |
| 7             | Latent Tuberculosis/                                                                                                 |
| 8             | Tuberculosis, Pulmonary/                                                                                             |
| 9             | Latent Tuberculosis/di                                                                                               |
| 10            | Mycobacterium tuberculosis/                                                                                          |
| 11            | 1 or 2 or 3 or 4 or 5 or 6 or 7 or 8 or 9 or 10                                                                      |
| 12            | tuberculin/                                                                                                          |
| 13            | tuberculin test/                                                                                                     |
| 14            | tst.tw.                                                                                                              |
| 15            | Tuberculin Skin Test.tw.                                                                                             |
| 16            | quantiferon*.tw.                                                                                                     |
| 17            | QFT*.tw.                                                                                                             |
| 18            | tspot*.tw.                                                                                                           |
| 19            | exp Enzyme-Linked Immunosorbent Assay/                                                                               |
| 20            | Interferon-gamma Release Tests/                                                                                      |
| 21            | ((interferon* or IFN*) adj3 gamma* adj3 (release* or test* or assay*)).tw.                                           |
| 22            | ((y-interferon or interferon-y) adj3 (release* or test* or assay*)).tw.                                              |
| 23            | IGRA*.tw.                                                                                                            |
| 24            | (tuberculin adj3 survey).tw.                                                                                         |
| 25            | PPD.tw.                                                                                                              |
| 26            | ((TST or tuberculin skin test) adj3 (converter or conversion)).tw.                                                   |
| 27            | ((TB or tuberculosis) adj3 reactivation).tw.                                                                         |
| 28            | ((LTBI or latent tuberculosis infection) adj3 reactivation).tw.                                                      |
| 29            | (reactivation adj3 (LTBI or latent tuberculosis infection)).tw.                                                      |
| 30            | ((IGRA or interferon gamma release assay) adj3 (converter or conversion)).tw.                                        |
| 31            | ((TST or tuberculin skin test) adj3 reactor).tw.                                                                     |
| 32            | 12 or 13 or 14 or 15 or 16 or 17 or 18 or 19 or 20 or 21 or 22 or 23 or 24 or 25 or 26 or 27 or 28 or 29 or 30 or 31 |
| 33            | diagnostic test/                                                                                                     |
| 34            | procedures/                                                                                                          |
| 35            | cohort analysis/                                                                                                     |
| 36            | incidence/                                                                                                           |
| 37            | longitudinal study/                                                                                                  |
| 38            | mass screening/                                                                                                      |
| 39            | controlled clinical trial/                                                                                           |
| 40            | risk/                                                                                                                |
| 41            | 33 or 34 or 35 or 36 or 37 or 38 or 39 or 40                                                                         |
| 42            | Animals/ not Humans/                                                                                                 |
| 43            | (enzyme linked immunospot assay or enzyme linked immuno* assay).tw.                                                  |
| 44            | t-spot*.tw.                                                                                                          |
| 45            | 32 or 43 or 44                                                                                                       |
| 46            | 11 and 41 and 45                                                                                                     |
| 47            | 46 not 42                                                                                                            |
| 48            | limit 47 to (english or french)                                                                                      |
| 49            | <b>limit 48 to yr="1990 -Current"</b>                                                                                |

**Table S2. EMBASE Search**

| Search Number | Term                                                                                                                 |
|---------------|----------------------------------------------------------------------------------------------------------------------|
| 1             | (laten* adj3 (tb* or tubercul*)).tw.                                                                                 |
| 2             | ltb*.tw.                                                                                                             |
| 3             | tb.tw.                                                                                                               |
| 4             | tubercul*.tw.                                                                                                        |
| 5             | Tuberculosis/                                                                                                        |
| 6             | latent tuberculosis infection.tw.                                                                                    |
| 7             | Latent Tuberculosis/                                                                                                 |
| 8             | Tuberculosis, Pulmonary/                                                                                             |
| 9             | Latent Tuberculosis/di                                                                                               |
| 10            | Mycobacterium tuberculosis/                                                                                          |
| 11            | 1 or 2 or 3 or 4 or 5 or 6 or 7 or 8 or 9 or 10                                                                      |
| 12            | tuberculin/                                                                                                          |
| 13            | tuberculin test/                                                                                                     |
| 14            | tst.tw.                                                                                                              |
| 15            | Tuberculin Skin Test.tw.                                                                                             |
| 16            | quantiferon*.tw.                                                                                                     |
| 17            | QFT*.tw.                                                                                                             |
| 18            | tspot*.tw.                                                                                                           |
| 19            | exp Enzyme-Linked Immunosorbent Assay/                                                                               |
| 20            | Interferon-gamma Release Tests/                                                                                      |
| 21            | ((interferon* or IFN*) adj3 gamma* adj3 (release* or test* or assay*)).tw.                                           |
| 22            | ((y-interferon or interferon-y) adj3 (release* or test* or assay*)).tw.                                              |
| 23            | IGRA*.tw.                                                                                                            |
| 24            | (tuberculin adj3 survey).tw.                                                                                         |
| 25            | PPD.tw.                                                                                                              |
| 26            | ((TST or tuberculin skin test) adj3 (converter or conversion)).tw.                                                   |
| 27            | ((TB or tuberculosis) adj3 reactivation).tw.                                                                         |
| 28            | ((LTBI or latent tuberculosis infection) adj3 reactivation).tw.                                                      |
| 29            | (reactivation adj3 (LTBI or latent tuberculosis infection)).tw.                                                      |
| 30            | ((IGRA or interferon gamma release assay) adj3 (converter or conversion)).tw.                                        |
| 31            | ((TST or tuberculin skin test) adj3 reactor).tw.                                                                     |
| 32            | 12 or 13 or 14 or 15 or 16 or 17 or 18 or 19 or 20 or 21 or 22 or 23 or 24 or 25 or 26 or 27 or 28 or 29 or 30 or 31 |
| 33            | diagnostic test/                                                                                                     |
| 34            | procedures/                                                                                                          |
| 35            | cohort analysis/                                                                                                     |
| 36            | incidence/                                                                                                           |
| 37            | longitudinal study/                                                                                                  |
| 38            | mass screening/                                                                                                      |
| 39            | controlled clinical trial/                                                                                           |
| 40            | risk/                                                                                                                |
| 41            | 33 or 34 or 35 or 36 or 37 or 38 or 39 or 40                                                                         |
| 42            | Animals/ not Humans/                                                                                                 |
| 43            | (enzyme linked immunospot assay or enzyme linked immuno* assay).tw.                                                  |
| 44            | t-spot*.tw.                                                                                                          |
| 45            | 32 or 43 or 44                                                                                                       |
| 46            | 11 and 41 and 45                                                                                                     |
| 47            | 46 not 42                                                                                                            |
| 48            | limit 47 to (english or french)                                                                                      |
| 49            | <b>limit 48 to yr="1990 -Current"</b>                                                                                |



**Table S3. CENTRAL Search**

| Search Number | Term                                                                                                                 |
|---------------|----------------------------------------------------------------------------------------------------------------------|
| 1             | MeSH descriptor: [Latent Tuberculosis] explode all trees                                                             |
| 2             | MeSH descriptor: [Tuberculosis] explode all trees                                                                    |
| 3             | MeSH descriptor: [Tuberculosis, Pulmonary] explode all trees                                                         |
| 4             | ltb*:ti,ab,kw (Word variations have been searched)                                                                   |
| 5             | tb or tubercul*:ti,ab,kw                                                                                             |
| 6             | latent tuberculosis infection:ti,ab,kw                                                                               |
| 7             | MeSH descriptor: [Latent Tuberculosis] explode all trees                                                             |
| 8             | MeSH descriptor: [Mycobacterium tuberculosis] explode all trees                                                      |
| 9             | latent tuberculosis or latent tb or (laten* tb) or (laten* tubercul*):ti,ab,kw                                       |
| 10            | #1 or #2 or #3 or #4 or #5 or #6 or #7 or #8 or #9                                                                   |
| 11            | MeSH descriptor: [Tuberculin] explode all trees                                                                      |
| 12            | MeSH descriptor: [Tuberculin Test] explode all trees                                                                 |
| 13            | tst or Tuberculin Skin Test:ti,ab,kw                                                                                 |
| 14            | quantiferon or qft*:ti,ab,kw                                                                                         |
| 15            | tspot*:ti,ab,kw                                                                                                      |
| 16            | t-spot*:ti,ab,kw                                                                                                     |
| 17            | MeSH descriptor: [Enzyme-Linked Immunosorbent Assay] explode all trees                                               |
| 18            | MeSH descriptor: [Interferon-gamma Release Tests] explode all trees                                                  |
| 19            | ((interferon* or IFN*) next gamma* near (release* or test* or assay)):ti,ab,kw                                       |
| 20            | ((y-interferon or interferon-y) near (release* or test* or assay*)):ti,ab,kw                                         |
| 21            | IGRA*:ti,ab,kw                                                                                                       |
| 22            | ((enzyme linked immunospot assay) or (enzyme linked immuno* assay)):ti,ab,kw                                         |
| 23            | tuberculin near survey:ti,ab,kw                                                                                      |
| 24            | PPD:ti,ab,kw                                                                                                         |
| 25            | (TST or tuberculin skin test) near (converter or conversion or reactor):ti,ab,kw                                     |
| 26            | (TB or tuberculosis) near reactivation:ti,ab,kw                                                                      |
| 27            | (LTBI or latent tuberculosis infection) near reactivation:ti,ab,kw                                                   |
| 28            | (IGRA or interferon gamma release assay) near (converter or conversion):ti,ab,kw                                     |
| 29            | #11 or #12 or #13 or #14 or #15 or #16 #17 or #18 or #19 or #20 or #21 or #22 or #23 or #24 or #25 #26 or #27 or #28 |
| 30            | MeSH descriptor: [Diagnostic Tests, Routine] explode all trees                                                       |
| 31            | MeSH descriptor: [Methods] explode all trees                                                                         |
| 32            | MeSH descriptor: [Cohort Studies] explode all trees                                                                  |
| 33            | MeSH descriptor: [Incidence] explode all trees                                                                       |
| 34            | MeSH descriptor: [Longitudinal Studies] explode all trees                                                            |
| 35            | MeSH descriptor: [Mass Screening] explode all trees                                                                  |
| 36            | MeSH descriptor: [Controlled Clinical Trial] explode all trees                                                       |
| 37            | MeSH descriptor: [Risk] explode all trees                                                                            |
| 38            | #30 or #31 or #32 or #33 or #34 or #35 or #36 or #37                                                                 |
| 39            | MeSH descriptor: [Animals] explode all trees                                                                         |
| 40            | <b>#10 and #29 and #38 not #39 Publication Year from 1990</b>                                                        |

**Table S4. Fields Extracted from Included Studies**

| <b>Field</b>                               | <b>Variables Extracted</b>                                                                                                                                                                         |
|--------------------------------------------|----------------------------------------------------------------------------------------------------------------------------------------------------------------------------------------------------|
| <b>STUDY CHARACTERISTICS</b>               |                                                                                                                                                                                                    |
| Study-Identifiers                          | Study ID, First Author, Year Published, Title, Main Population Studied                                                                                                                             |
| Study Design                               | Type of study (cohort, trial), Study Location, Year Study Initiated, Country-Level Income, Annual TB Incidence                                                                                     |
| Funding                                    | Industry Sponsors, NGO sponsors                                                                                                                                                                    |
| Tests Used                                 | Tuberculin Skin Test Used, Tuberculin Units Used, Cut-Point Variations, Main Cut-Point Used, IGRAs Used, IGRA Generation                                                                           |
| Event Ascertainment                        | Planned Follow-up Duration, TB Diagnosis Method, Year Study Completed                                                                                                                              |
| Study Entry Criteria                       | Inclusion and Exclusion Criteria                                                                                                                                                                   |
| <b>PATIENT CHARACTERISTICS (AGGREGATE)</b> |                                                                                                                                                                                                    |
| Patients Included                          | Total Patients Recruited, Total Positive, Total Positive and Treated, Total Negative, Total Negative and Treated, Indeterminates, Total and Proportion Lost to Follow-up                           |
| Sex                                        | Number Male, Proportion Male                                                                                                                                                                       |
| Age                                        | Estimate Type (e.g. Mean, Median), Estimate, Dispersion Type (e.g. SD, IQR, Range), Dispersion                                                                                                     |
| Race/Ethnicity                             | Freeform entry based on study reporting                                                                                                                                                            |
| Body Mass Index                            | Estimate and dispersion in kg/m <sup>2</sup>                                                                                                                                                       |
| HIV Information                            | Number infected, Proportion infected, Duration of Infection, Antiretroviral Use, CD4 estimate and dispersion information                                                                           |
| Dialysis Information                       | Number and proportion on dialysis, duration on dialysis, estimate and dispersion of the estimated glomerular filtration rate                                                                       |
| Diabetes Information                       | Number and proportion with diabetes, duration of diabetes, number and proportion receiving medication for diabetes, estimate and dispersion of HbA <sub>1c</sub>                                   |
| Cancer Information                         | Number and proportion with cancer, cancer type, duration of cancer                                                                                                                                 |
| Indigenous Information                     | Freeform entry based on study reporting                                                                                                                                                            |
| TB Contacts Information                    | Number and proportion of contacts by type (household/close, casual), time since contact                                                                                                            |
| Smoker Information                         | Number and proportion of smokers by type (current or ex), duration of smoking, pack years smoked                                                                                                   |
| Alcohol Abuse Information                  | Number and proportion with alcohol abuse, alcohol abuse definition                                                                                                                                 |
| Bacillus Calmette-Guérin Vaccination       | Number and proportion vaccinated                                                                                                                                                                   |
| Immune Suppressing Medication Information  | Number and proportion receiving medications, medications received, estimate and dispersion of medication dose, duration of treatment                                                               |
| Chest X-Ray Abnormality Information        | Number and proportion with abnormalities                                                                                                                                                           |
| Previous TB Treatment Information          | Number and proportion with previous TB, estimate and dispersion of time since last episode                                                                                                         |
| <b>OUTCOMES</b>                            |                                                                                                                                                                                                    |
| Subgroup Identifiers                       | Test Type, Cut-point, Population Type                                                                                                                                                              |
| Patient Follow-up                          | Number included positive, number included negative, estimate and dispersion of patient follow-up in months, cumulative follow-up                                                                   |
| Active TB Development                      | Number developing TB test-positive, number developing TB test-negative, number microbiologically diagnosed, number clinically diagnosed, estimate and dispersion of time to tuberculosis diagnosis |

**Table S5. QUADAS-2 adapted quality assessment criteria**

| Criteria Number | Question                                                                                                                           |
|-----------------|------------------------------------------------------------------------------------------------------------------------------------|
| 1               | Are the methods of patient selection and the patients themselves adequately described? (Yes / No / Unclear)                        |
| 2               | Were patients random or consecutively selected and were inappropriate exclusions avoided? (Yes / No / Unclear)                     |
| 3               | <b>Selection Bias:</b> Could the patient selection have introduced bias? (Yes / No / Unclear) <sup>a</sup>                         |
| 4               | Was how the test was conducted and interpreted adequately described? (Yes / No / Unclear)                                          |
| 5               | <b>Test Conduct Bias:</b> Could the conduct of the test have introduced bias? (Yes / No / Unclear) <sup>b</sup>                    |
| 6               | Are the excluded patients properly described? (Yes / No / Unclear)                                                                 |
| 7               | <b>Follow-up Bias:</b> Could the flow of patients through the study introduced bias? (Yes / No / Unclear) <sup>c</sup>             |
| 8               | Was the process for follow-up and event ascertainment clearly described? (Yes / No / Unclear)                                      |
| 9               | <b>Event Ascertainment Bias:</b> Was the method of event ascertainment likely to introduce bias? (Yes / No / Unclear) <sup>d</sup> |

\*Answers highlighted in green indicate those that would improve quality; answers highlighted in red indicate those that would reduce quality.

<sup>a</sup>Selection bias encompassed inappropriate inclusion and exclusion criteria (e.g. excluding long-standing immune-deficiency or CD4 counts, excluding people from certain countries)

<sup>b</sup>Test conduct bias encompassed inappropriate application of tests (e.g. several week duration between tests being given; only certain individuals receiving both tests)

<sup>c</sup>Follow-up bias encompassed how patients tested were followed and documented reasons for drop-out (e.g. >10% drop-out, no description of when people dropped out)

<sup>d</sup>Event ascertainment bias encompassed inappropriate methods to detect TB (e.g. no use of a TB registry in a retrospective study, TB diagnosis only based on smear)

**Table S6. Characteristics of Included Studies**

| <b>Characteristic</b>                                   | <b>TST<sup>a</sup></b> | <b>QuantiFERON-TB<sup>b</sup></b> | <b>T-SPOT.TB<sup>c</sup></b> | <b>Overall</b>   |
|---------------------------------------------------------|------------------------|-----------------------------------|------------------------------|------------------|
| Number of Included Studies                              | 102                    | 57                                | 25                           | 122              |
| Median Year of Study Start (IQR)                        | 2005 (2000-2007)       | 2007 (2006-2009)                  | 2007 (2005-2009)             | 2006 (2002-2008) |
| <b>Study Type</b>                                       |                        |                                   |                              |                  |
| Clinical Trial                                          | 1 (1%)                 | 0 (0%)                            | 1 (4%)                       | 2 (2%)           |
| Prospective Cohort                                      | 66 (65%)               | 40 (70%)                          | 21 (84%)                     | 79 (65%)         |
| Retrospective Cohort                                    | 35 (34%)               | 17 (30%)                          | 3 (12%)                      | 41 (33%)         |
| <b>Study Quality</b>                                    |                        |                                   |                              |                  |
| Low                                                     | 40 (39%)               | 19 (33%)                          | 9 (36%)                      | 47 (39%)         |
| Moderate                                                | 40 (39%)               | 27 (47%)                          | 7 (28%)                      | 50 (41%)         |
| High                                                    | 22 (22%)               | 11 (20%)                          | 9 (36%)                      | 25 (20%)         |
| <b>Follow-up Type</b>                                   |                        |                                   |                              |                  |
| Passive                                                 | 51 (50%)               | 24 (42%)                          | 5 (20%)                      | 59 (48%)         |
| Active                                                  | 51 (50%)               | 33 (59%)                          | 20 (80%)                     | 63 (52%)         |
| <b>Years of Follow-up*</b>                              |                        |                                   |                              |                  |
| Mean (SD)                                               | 3.1 (2.1)              | 2.6 (1.2)                         | 2.6 (1.1)                    | 3.1 (2.0)        |
| ≤2 years                                                | 47 (46%)               | 24 (42%)                          | 11 (44%)                     | 55 (45%)         |
| >2 years                                                | 55 (54%)               | 33 (58%)                          | 14 (66%)                     | 67 (55%)         |
| <b>Definition of Tuberculosis</b>                       |                        |                                   |                              |                  |
| Only Microbiological                                    | 16 (16%)               | 3 (5%)                            | 4 (16%)                      | 17 (14%)         |
| Both Microbiological and Clinical                       | 50 (49%)               | 26 (46%)                          | 13 (52%)                     | 62 (51%)         |
| Not Specified                                           | 36 (35%)               | 28 (49%)                          | 8 (32%)                      | 43 (35%)         |
| <b>Country-Level Tuberculosis Incidence<sup>†</sup></b> |                        |                                   |                              |                  |
| ≥30 per 100,000                                         | 57 (56%)               | 25 (44%)                          | 16 (64%)                     | 66 (54%)         |
| ≥100 per 100,000                                        | 17 (17%)               | 4 (7%)                            | 0 (0%)                       | 18 (15%)         |
| <b>Country-Level Income</b>                             |                        |                                   |                              |                  |
| High Income                                             | 69 (68%)               | 49 (86%)                          | 21 (84%)                     | 87 (71%)         |
| Other                                                   | 33 (32%)               | 8 (14%)                           | 4 (16%)                      | 35 (29%)         |
| <b>Patients Excluded due to LTBI Treatment</b>          |                        |                                   |                              |                  |
| No Patients Excluded due to LTBI Treatment              | 40 (49%)               | 21 (37%)                          | 7 (28%)                      | 49 (40%)         |
| <20% Patients Excluded due to LTBI Treatment            | 59 (58%)               | 32 (56%)                          | 10 (40%)                     | 70 (57%)         |
| ≥20% Patients Excluded due to LTBI Treatment            | 43 (42%)               | 25 (44%)                          | 15 (60%)                     | 52 (43%)         |

Abbreviations: TST, tuberculin skin test; IQR, interquartile range; SD, standard deviation.

\*Across all reported arms reporting data among untreated test-positive individuals.

<sup>†</sup>Based on year of study start or the year 2000 if study began before this year.

<sup>a</sup>Includes 31 studies using QuantiFERON, 9 studies using T-SPOT.TB, and 10 studies using both.

<sup>b</sup>Includes 31 studies using TST, 2 studies using T-SPOT.TB, and 10 studies using both.

<sup>c</sup>Includes 9 studies using TST, 2 studies using QuantiFERON, and 10 studies using both.

<sup>d</sup>Of 102 studies, 78 reported the tuberculin units used. Of these 78 studies, 42 (54%) used 2 tuberculin units, 27 (35%) used 5 tuberculin units, 5 (6%) used 1 tuberculin unit, 3 (4%) used 10 tuberculin units, and 1 (1%) used 3 tuberculin units. Only one study used Heaf testing.

All values are n (%), unless otherwise specified.

**Table S7. Detailed Individual Study Characteristics**

| Author (Year)                        | Study Design         | Population(s)                                                              | Country or Region | Years Study Conducted | Study Setting                             | Follow-up Method | Definition of Tuberculosis   | LTBI Diagnostic Test(s) Evaluated* | Study Quality (Possible Biases)                               |
|--------------------------------------|----------------------|----------------------------------------------------------------------------|-------------------|-----------------------|-------------------------------------------|------------------|------------------------------|------------------------------------|---------------------------------------------------------------|
| <b>GENERAL POPULATION STUDIES</b>    |                      |                                                                            |                   |                       |                                           |                  |                              |                                    |                                                               |
| Cook (2008) <sup>1</sup>             | Retrospective Cohort | Low-Risk Tuberculin Reactors                                               | Canada            | 1990 to 2006          | Provincial (British Columbia) TB Registry | Passive          | Microbiological and Clinical | TST (10mm)                         | Low (Selection; Test Conduct; Follow-up; Event Ascertainment) |
| Horsburgh (2009) <sup>2</sup>        | Retrospective Cohort | HIV-Uninfected, United States Born Tuberculin Reactors                     | United States     | 1997 to 2001          | Entire City (Palm Beach)                  | Passive          | Microbiological and Clinical | TST (10mm)                         | Low (Selection; Test Conduct; Follow-up; Event Ascertainment) |
| Ward (2017) <sup>3</sup>             | Retrospective Cohort | Non-Indigenous Canadian-Born Tuberculin Reactors                           | Canada            | 1986 to 2002          | Provincial (Saskatchewan) TB Registry     | Passive          | Microbiological and Clinical | TST (10mm)                         | Low (Selection; Test Conduct; Follow-up; Event Ascertainment) |
| <b>AT-RISK POPULATION STUDIES</b>    |                      |                                                                            |                   |                       |                                           |                  |                              |                                    |                                                               |
| Abubakar (2018) <sup>4</sup>         | Prospective Cohort   | Close and Casual Contacts (Together) and Recent Immigrant/Refugee Arrivals | United Kingdom    | 2010 to 2017          | Clinics, Community Settings               | Active           | Microbiological and Clinical | TST (5, 10mm), QFT-GIT, T-SPOT.TB  | High                                                          |
| Agarwal (2010) <sup>5</sup>          | Prospective Cohort   | Transplant                                                                 | India             | 2000 to 2007          | Single Hospital                           | Active           | Microbiological              | TST (10mm)                         | High (Event Ascertainment)                                    |
| Aichelburg (2014) <sup>6</sup>       | Prospective Cohort   | HIV                                                                        | Austria           | 2006 to Not Specified | HIV Outpatient Clinic                     | Active           | Microbiological and Clinical | QFT-GIT                            | Moderate (Selection; Follow-up)                               |
| Aki (2018) <sup>7</sup>              | Retrospective Cohort | Transplant                                                                 | Turkey            | 2003 to 2014          | University Transplantation Unit           | Passive          | Not Specified                | TST (5, 10mm)                      | Moderate (Follow-up; Event Ascertainment)                     |
| Al Kubaisy (2003) <sup>8</sup>       | Prospective Cohort   | Children (<18 years)                                                       | Iraq              | 2000 to 2002          | Iraqi Governates                          | Passive          | Microbiological and Clinical | TST (10mm)                         | Low (Selection; Follow-up; Event Ascertainment)               |
| Altet (2015) <sup>9</sup>            | Prospective Cohort   | Close Contacts Only                                                        | Spain             | 2007 to 2013          | Entire City (Barcelona)                   | Active           | Not Specified                | TST (5, 10, 15mm), QFT-GIT         | High (Follow-up)                                              |
| Anger (2012) <sup>10</sup>           | Retrospective Cohort | Close and Casual Contacts (Together)                                       | United States     | 1997 to 2003          | Entire City (New York City)               | Passive          | Microbiological and Clinical | TST (5mm)                          | Moderate (Test Conduct; Event Ascertainment)                  |
| Arroyave (2017) <sup>11</sup>        | Prospective Cohort   | Prisoners                                                                  | Colombia          | 2012 to 2015          | Prison                                    | Active           | Microbiological and Clinical | TST (10mm)                         | Low (Selection; Follow-up; Event Ascertainment)               |
| Bakir (2008) <sup>12</sup>           | Prospective Cohort   | Close Contacts Only                                                        | Turkey            | 2002 to 2006          | Tuberculosis Clinics                      | Active           | Microbiological and Clinical | TST (10mm), T-SPOT.TB              | High                                                          |
| Baliashvili (2018) <sup>13</sup>     | Retrospective Cohort | Close Contacts Only                                                        | Georgia           | 2012 to 2014          | Entire Country                            | Passive          | Not Specified                | TST (10mm)                         | High (Event Ascertainment)                                    |
| Benito (2002) <sup>14</sup>          | Retrospective Cohort | Transplant                                                                 | Spain             | 1988 to 1998          | Tertiary Hospital                         | Passive          | Microbiological and Clinical | TST (5mm)                          | Moderate (Selection; Follow-up)                               |
| Bergot (2012) <sup>15</sup>          | Prospective Cohort   | Close and Casual Contacts (Together)                                       | France            | 2007 to 2011          | Entire City (Basse-Normandie)             | Passive          | Microbiological and Clinical | TST (10mm), QFT-GIT                | High                                                          |
| Bourgarit (2015) <sup>16</sup>       | Prospective Cohort   | HIV                                                                        | France            | 2009 to 2013          | HIV Clinics                               | Active           | Not Specified                | TST (5mm), QFT-GIT, T-SPOT.TB      | Moderate (Selection; Follow-up)                               |
| Bradshaw (2011) <sup>17</sup>        | Prospective Cohort   | Close and Casual Contacts (Together)                                       | United Kingdom    | 2007 to 2010          | Hospital                                  | Active           | Not Specified                | QFT-GIT                            | High (Follow-up)                                              |
| Cailleaux-Cezar (2009) <sup>18</sup> | Retrospective Cohort | Close and Casual Contacts (Together)                                       | Brazil            | 2000 to 2004          | University Hospital                       | Passive          | Microbiological and Clinical | TST (5, 10mm)                      | Moderate (Follow-up; Event Ascertainment)                     |
| Chakhaia (2014) <sup>19</sup>        | Retrospective Cohort | Close Contacts Only                                                        | Georgia           | 2010 to 2013          | Ambulatory Hospital Department            | Passive          | Microbiological and Clinical | TST (5mm)                          | Moderate (Selection)                                          |

**Table S7. Detailed Individual Study Characteristics**

| Author (Year)                      | Study Design         | Population(s)                        | Country or Region  | Years Study Conducted | Study Setting                  | Follow-up Method | Definition of Tuberculosis   | LTBI Diagnostic Test(s) Evaluated*     | Study Quality (Possible Biases)                               |
|------------------------------------|----------------------|--------------------------------------|--------------------|-----------------------|--------------------------------|------------------|------------------------------|----------------------------------------|---------------------------------------------------------------|
| Chang (2011) <sup>20</sup>         | Prospective Cohort   | Immune Suppressing Medications       | South Korea        | 2007 to 2009          | Healthcare Facility            | Passive          | Not Specified                | TST (10mm), QFT-GIT                    | Moderate (Follow-up; Event Ascertainment)                     |
| Chan-Yeung (2007) <sup>21</sup>    | Prospective Cohort   | Elderly ( $\geq 65$ years)           | Hong Kong          | 2000 to 2005          | Old Age Homes                  | Active           | Microbiological and Clinical | TST (5, 10, 15mm)                      | Low (Selection; Follow-up; Event Ascertainment)               |
| Chee (2004) <sup>22</sup>          | Prospective Cohort   | Close Contacts Only                  | Singapore          | 1998 to 2002          | Entire Country                 | Passive          | Not Specified                | TST (10mm)                             | Low (Selection; Test Conduct; Follow-up; Event Ascertainment) |
| Chigbu (2010) <sup>23</sup>        | Prospective Cohort   | Prisoners                            | Nigeria            | 2006 to 2007          | Federal Prisons                | Active           | Microbiological              | TST (5, 10mm)                          | Moderate (Selection; Follow-up)                               |
| Christopoulos (2009) <sup>24</sup> | Prospective Cohort   | Dialysis                             | Greece             | 2001 to 2004          | Dialysis Outpatient Units      | Active           | Microbiological and Clinical | TST (5, 10mm)                          | Low (Selection; Follow-up; Event Ascertainment)               |
| Chung (2010) <sup>25</sup>         | Prospective Cohort   | Dialysis                             | South Korea        | 2009 to 2010          | Training Hospital              | Active           | Microbiological and Clinical | TST (10mm), QFT-GIT, T-SPOT. <i>TB</i> | Low (Selection; Follow-up; Event Ascertainment)               |
| Daley (1998) <sup>26</sup>         | Prospective Cohort   | Injection Drug Users, HIV            | United States      | 1990 to 1996          | Metadone Maintenance Clinics   | Passive          | Microbiological              | TST (5, 10mm)                          | Moderate (Selection; Follow-up)                               |
| Denholm (2012) <sup>27</sup>       | Retrospective Cohort | Close and Casual Contacts (Together) | Australia          | 1995 to 2010          | Entire Province (Victoria)     | Passive          | Not Specified                | TST (10mm)                             | Low (Test Conduct; Follow-up; Event Ascertainment)            |
| Diel (2011) <sup>28</sup>          | Prospective Cohort   | Close Contacts Only                  | Germany            | 2005 to 2010          | Entire City (Hamburg)          | Passive          | Microbiological and Clinical | TST (5, 10, 15mm), QFT-GIT             | High (Follow-up)                                              |
| Dobler (2013) <sup>29</sup>        | Retrospective Cohort | Close and Casual Contacts (Together) | Australia          | 2000 to 2009          | Tuberculosis Clinics           | Passive          | Not Specified                | TST (10mm)                             | Low (Test Conduct; Follow-up; Event Ascertainment)            |
| Dogan (2009) <sup>30</sup>         | Prospective Cohort   | Dialysis                             | Turkey             | 2003 to 2004          | Hospitals                      | Active           | Not Specified                | TST (10mm)                             | Moderate (Selection; Event Ascertainment)                     |
| Edathodu (2017) <sup>31</sup>      | Prospective Cohort   | Transplant                           | Saudi Arabia       | 2008 to 2013          | Hospital                       | Active           | Not Specified                | QFT-GIT                                | Moderate (Follow-up; Event Ascertainment)                     |
| Elliot (2018) <sup>32</sup>        | Retrospective Cohort | Recent Immigrant/Refugee Arrivals    | Australia          | 2007 to 2013          | Refugee Program                | Passive          | Not Specified                | TST (10mm)                             | Low (Selection; Follow-up; Event Ascertainment)               |
| Elzi (2007) <sup>33</sup>          | Prospective Cohort   | HIV                                  | Switzerland        | 1996 to 2006          | HIV Outpatient Clinics         | Passive          | Not Specified                | TST (5mm)                              | Low (Test Conduct; Follow-up; Event Ascertainment)            |
| Espinal (2000) <sup>34</sup>       | Case-Control         | Close Contacts Only                  | Dominican Republic | 1994 to 1996          | Medical Institutions           | Active           | Microbiological and Clinical | TST (10mm)                             | Moderate (Selection; Follow-up)                               |
| Fang (2002) <sup>35</sup>          | Prospective Cohort   | Dialysis                             | Taiwan             | 1999 to 2000          | Outpatient Dialysis Unit       | Active           | Microbiological and Clinical | TST (10mm)                             | High (Selection)                                              |
| Fournier (2015) <sup>36</sup>      | Prospective Cohort   | Close and Casual Contacts (Together) | France             | 2010 to 2011          | Specialist Tuberculosis Centre | Active           | Not Specified                | QFT-GIT                                | Moderate (Follow-up; Event Ascertainment)                     |
| Franken (2008) <sup>37</sup>       | Prospective Cohort   | Close and Casual Contacts (Together) | Netherlands        | 2005 to 2007          | Single Contact Investigation   | Active           | Not Specified                | TST (15mm), QFT-GIT, T-SPOT. <i>TB</i> | Low (Selection; Follow-up; Event Ascertainment)               |

**Table S7. Detailed Individual Study Characteristics**

| Author (Year)                       | Study Design         | Population(s)                                                        | Country or Region | Years Study Conducted | Study Setting                                  | Follow-up Method | Definition of Tuberculosis   | LTBI Diagnostic Test(s) Evaluated* | Study Quality (Possible Biases)                               |
|-------------------------------------|----------------------|----------------------------------------------------------------------|-------------------|-----------------------|------------------------------------------------|------------------|------------------------------|------------------------------------|---------------------------------------------------------------|
| Gao (2017) <sup>38</sup>            | Prospective Cohort   | Diabetes, Elderly (≥65 years), BMI <18.5 kg/m <sup>2</sup> , Smokers | China             | 2013 to 2015          | Rural China                                    | Active           | Microbiological and Clinical | QFT-GIT                            | High (Follow-up)                                              |
| Garie (2011) <sup>39</sup>          | Prospective Cohort   | Close Contacts Only                                                  | Ethiopia          | 2007 to 2009          | Health Centre and Hospital                     | Active           | Microbiological              | TST (5, 10mm)                      | High (Event Ascertainment)                                    |
| Girardi (1997) <sup>40</sup>        | Prospective Cohort   | HIV                                                                  | Italy             | 1990 to 1993          | Infectious Disease Hospital Units              | Active           | Microbiological              | TST (5, 10mm)                      | Moderate (Follow-up)                                          |
| Golub (2015) <sup>41</sup>          | RCT                  | HIV                                                                  | Brazil            | 2003 to 2012          | HIV Clinics                                    | Passive          | Microbiological and Clinical | TST (5mm)                          | High (Test Conduct)                                           |
| Gómez-Reino (2007) <sup>42</sup>    | Retrospective Cohort | Immune Suppressing Medications                                       | Spain             | 2002 to 2005          | Nationwide Registry                            | Passive          | Microbiological and Clinical | TST (5mm)                          | Low (Selection; Test Conduct; Follow-up)                      |
| Grinsdale (2016) <sup>43</sup>      | Retrospective Cohort | Children (<18 years), Young Children (<5 years)                      | United States     | 2005 to 2008          | Healthcare Centres and Community Organizations | Passive          | Not Specified                | TST (10mm), QFT-G                  | Low (Selection; Test Conduct; Follow-up)                      |
| Guirao-Arrabal (2016) <sup>44</sup> | Retrospective Cohort | Transplant                                                           | Spain             | 1993 to 2013          | Teaching Hospital                              | Passive          | Microbiological              | TST (5mm)                          | Moderate (Selection; Test Conduct)                            |
| Haldar (2013) <sup>45</sup>         | Prospective Cohort   | Close Contacts Only                                                  | United Kingdom    | 2007 to 2010          | Hospital                                       | Passive          | Microbiological and Clinical | QFT-GIT                            | Moderate (Selection)                                          |
| Hand (2018) <sup>46</sup>           | Retrospective Cohort | Transplant                                                           | United States     | 2010 to Not Specified | Hospital                                       | Passive          | Not Specified                | QFT-G                              | Low (Selection; Test Conduct; Follow-up; Event Ascertainment) |
| Harstad (2010) <sup>47</sup>        | Retrospective Cohort | Recent Immigrant/Refugee Arrivals                                    | Norway            | 2005 to 2008          | Asylum Seeker Reception Centre                 | Passive          | Not Specified                | TST (5, 15mm), QFT-GIT             | Moderate (Test Conduct; Follow-up)                            |
| Hemmati (2011) <sup>48</sup>        | Prospective Cohort   | Children (<18 years)                                                 | Iran              | 2002 to 2007          | Primary Schools                                | Active           | Not Specified                | TST (10, 15mm)                     | Low (Selection; Follow-up; Event Ascertainment)               |
| Higuchi (2009) <sup>49</sup>        | Prospective Cohort   | Close and Casual Contacts (Together)                                 | Japan             | 2005 to 2008          | Single Contact Investigation                   | Active           | Microbiological and Clinical | TST (5, 10mm), QFT-G               | Low (Selection; Follow-up; Event Ascertainment)               |
| Hill (2007) <sup>50</sup>           | Prospective Cohort   | Close and Casual Contacts (Together)                                 | The Gambia        | 2002 to 2004          | Government Tuberculosis Clinic                 | Passive          | Microbiological and Clinical | TST (10mm)                         | Moderate (Selection)                                          |
| Huang (2018) <sup>51</sup>          | Retrospective Cohort | Immune Suppressing Medications                                       | Taiwan            | 2012 to 2017          | Tertiary Medical Centre                        | Passive          | Microbiological and Clinical | QFT-GIT                            | Moderate (Selection; Follow-up)                               |
| Huerga (2019) <sup>52</sup>         | Prospective Cohort   | Close Contacts Only                                                  | Armenia           | 2012 to 2016          | Médecins Sans Frontières Supported Centres     | Active           | Microbiological and Clinical | TST (10mm), QFT-GIT                | High                                                          |
| Jambaldorj (2017) <sup>53</sup>     | Retrospective Cohort | Transplant                                                           | South Korea       | 2009 to 2015          | University Hospital                            | Passive          | Not Specified                | QFT-GIT                            | Moderate (Follow-up; Event Ascertainment)                     |
| Jeyakumar (1999) <sup>54</sup>      | Retrospective Cohort | Occupational Risk Factor                                             | Malaysia          | 1994 to 1999          | Nursing School                                 | Passive          | Microbiological and Clinical | TST (5, 10, 15mm)                  | Moderate (Follow-up; Event Ascertainment)                     |
| Jo (2013) <sup>55</sup>             | Retrospective Cohort | Immune Suppressing Medications                                       | South Korea       | 2004 to 2012          | Referral Hospital                              | Active           | Not Specified                | TST (10mm), T-SPOT.TB              | Low (Selection; Follow-up; Event Ascertainment)               |
| Joshi (2011) <sup>56</sup>          | Prospective Cohort   | Occupational Risk Factor                                             | India             | 2004 to 2010          | Medical Institute                              | Passive          | Not Specified                | TST (10mm), QFT-GIT                | Low (Selection; Test Conduct; Follow-up; Event Ascertainment) |

**Table S7. Detailed Individual Study Characteristics**

| Author (Year)                 | Study Design         | Population(s)                                                  | Country or Region | Years Study Conducted | Study Setting                        | Follow-up Method | Definition of Tuberculosis   | LTBI Diagnostic Test(s) Evaluated*            | Study Quality (Possible Biases)                               |
|-------------------------------|----------------------|----------------------------------------------------------------|-------------------|-----------------------|--------------------------------------|------------------|------------------------------|-----------------------------------------------|---------------------------------------------------------------|
| Jung (2012) <sup>57</sup>     | Retrospective Cohort | Transplant                                                     | South Korea       | 2000 to 2010          | Tertiary Referral Hospital           | Passive          | Microbiological              | TST (5mm)                                     | High (Selection)                                              |
| Kik (2010) <sup>58</sup>      | Prospective Cohort   | Close Contacts Only                                            | Netherlands       | 2005 to 2009          | Municipal Health Services            | Active           | Microbiological and Clinical | TST (5, 10, 15mm), QFT-GIT, T-SPOT. <i>TB</i> | High (Selection)                                              |
| Kim (2015) <sup>59</sup>      | Retrospective Cohort | Immune Suppressing Medications                                 | South Korea       | 2007 to 2013          | Tertiary Academic Hospital           | Passive          | Microbiological and Clinical | TST (5mm)                                     | Low (Selection; Test Conduct; Follow-up; Event Ascertainment) |
| Kim (2017) <sup>60</sup>      | Prospective Cohort   | Occupational Risk Factor                                       | South Korea       | 2013 to 2014          | Tertiary Academic Hospital           | Active           | Not Specified                | TST (10mm)                                    | High                                                          |
| Kim (2015) <sup>61</sup>      | RCT                  | Transplant                                                     | South Korea       | 2010 to 2014          | Renal Transplant Unit                | Active           | Microbiological and Clinical | T-SPOT. <i>TB</i>                             | High                                                          |
| Kim (2011) <sup>62</sup>      | Prospective Cohort   | Transplant                                                     | South Korea       | 2008 to 2010          | Renal Transplant Unit                | Active           | Microbiological and Clinical | TST (10mm), T-SPOT. <i>TB</i>                 | High                                                          |
| Kim (2015) <sup>63</sup>      | Retrospective Cohort | Close and Casual Contacts (Together)                           | South Korea       | 2007 to 2012          | Tuberculosis Institute               | Passive          | Microbiological and Clinical | TST (10mm), QFT-GIT                           | Moderate (Selection; Follow-up)                               |
| Kruczak (2014) <sup>64</sup>  | Prospective Cohort   | Close and Casual Contacts (Together), Homeless, Long Term Care | Poland            | 2007 to 2013          | Entire City (Krakow)                 | Passive          | Microbiological and Clinical | TST (10mm), QFT-GIT                           | Moderate (Selection; Follow-up)                               |
| Laffitte (2009) <sup>65</sup> | Retrospective Cohort | Immune Suppressing Medications                                 | Switzerland       | 2004 to 2008          | Dermatological Centres               | Passive          | Not Specified                | TST (5mm), T-SPOT. <i>TB</i>                  | Low (Test Conduct; Follow-up; Event Ascertainment)            |
| Lange (2012) <sup>66</sup>    | Retrospective Cohort | Transplant                                                     | Germany           | 2006 to 2007          | University Hospital                  | Passive          | Not Specified                | QFT-GIT                                       | Low (Selection; Follow-up; Event Ascertainment)               |
| Lee (2012) <sup>67</sup>      | Prospective Cohort   | Close Contacts Only                                            | South Korea       | 2007 to 2009          | Single Contact Investigation         | Active           | Microbiological              | TST (10mm), T-SPOT. <i>TB</i>                 | Moderate (Follow-up)                                          |
| Lee (2014) <sup>68</sup>      | Prospective Cohort   | Transplant                                                     | South Korea       | 2010 to 2012          | Tertiary Hospital                    | Active           | Microbiological and Clinical | TST (5mm), QFT-GIT                            | Moderate (Selection; Test Conduct)                            |
| Lee (2015) <sup>69</sup>      | Retrospective Cohort | Immune Suppressing Medications                                 | South Korea       | 2007 to 2013          | Referral Hospital                    | Passive          | Microbiological and Clinical | TST (10mm), QFT-GIT                           | Moderate (Follow-up; Event Ascertainment)                     |
| Lee (2019) <sup>70</sup>      | Retrospective Cohort | HIV                                                            | South Korea       | 2006 to 2016          | University Hospital                  | Passive          | Microbiological and Clinical | T-SPOT. <i>TB</i>                             | Low (Selection; Follow-up; Event Ascertainment)               |
| Lee (2015) <sup>71</sup>      | Prospective Cohort   | HIV                                                            | Taiwan            | 2006 to 2012          | Medical Centre and Regional Hospital | Active           | Microbiological and Clinical | QFT-G                                         | High (Selection)                                              |
| Lee (2009) <sup>72</sup>      | Prospective Cohort   | Dialysis                                                       | Taiwan            | 2005 to Not Specified | Hospital                             | Active           | Microbiological and Clinical | TST (10mm), QFT-GIT, T-SPOT. <i>TB</i>        | Moderate (Selection; Follow-up)                               |
| Leow (2014) <sup>73</sup>     | Prospective Cohort   | Diabetes                                                       | Singapore         | 2007 to 2013          | Specialist Clinic                    | Passive          | Not Specified                | TST (10mm), T-SPOT. <i>TB</i>                 | Low (Selection; Follow-up; Event Ascertainment)               |
| Leung (2007) <sup>74</sup>    | Prospective Cohort   | Silicosis                                                      | Hong Kong         | 1995 to 2005          | Pneumoconiosis Clinic                | Active           | Microbiological and Clinical | TST (10mm)                                    | Moderate (Test Conduct; Follow-up)                            |
| Leung (2012) <sup>75</sup>    | Prospective Cohort   | Children (<18 years)                                           | Hong Kong         | 1999 to 2010          | Primary Schools                      | Passive          | Microbiological and Clinical | TST (5, 10, 15mm)                             | Moderate (Selection; Follow-up)                               |
| Leung (2015) <sup>76</sup>    | Prospective Cohort   | Close Contacts Only                                            | Hong Kong         | 2006 to 2013          | Entire Country Chest Clinics         | Passive          | Microbiological and Clinical | TST (5, 10mm), T-SPOT. <i>TB</i>              | High (Test Conduct)                                           |
| Leung (2010) <sup>77</sup>    | Prospective Cohort   | Silicosis                                                      | Hong Kong         | 2004 to 2009          | Pneumoconiosis Clinic                | Active           | Microbiological and Clinical | TST (5, 10, 15mm), T-SPOT. <i>TB</i>          | High (Follow-up)                                              |



**Table S7. Detailed Individual Study Characteristics**

| <b>Author (Year)</b>               | <b>Study Design</b>  | <b>Population(s)</b>                 | <b>Country or Region</b> | <b>Years Study Conducted</b> | <b>Study Setting</b>                      | <b>Follow-up Method</b> | <b>Definition of Tuberculosis</b> | <b>LTBI Diagnostic Test(s) Evaluated*</b> | <b>Study Quality (Possible Biases)</b>                        |
|------------------------------------|----------------------|--------------------------------------|--------------------------|------------------------------|-------------------------------------------|-------------------------|-----------------------------------|-------------------------------------------|---------------------------------------------------------------|
| Lienhardt (2010) <sup>78</sup>     | Prospective Cohort   | Close Contacts Only                  | Senegal                  | 2004 to 2006                 | Entire City (Dakar)                       | Active                  | Microbiological and Clinical      | TST (5, 10, 15mm)                         | Moderate (Selection; Follow-up)                               |
| Ling (2011) <sup>79</sup>          | Retrospective Cohort | Close and Casual Contacts (Together) | Taiwan                   | 2005 to 2007                 | Country TB Registry                       | Passive                 | Microbiological and Clinical      | TST (5, 10, 15mm)                         | Low (Selection; Test Conduct; Follow-up)                      |
| Luabeya (2015) <sup>80</sup>       | Prospective Cohort   | Young Children (<5 years)            | South Africa             | 2009 to 2012                 | Rural Region Near Cape Town               | Passive                 | Microbiological and Clinical      | QFT-GIT                                   | Moderate (Selection; Event Ascertainment)                     |
| Marks (2000) <sup>81</sup>         | Retrospective Cohort | Recent Immigrant/Refugee Arrivals    | Australia                | 1984 to 1998                 | Refugee Screening Units                   | Passive                 | Microbiological and Clinical      | TST (10, 15mm)                            | Low (Selection; Test Conduct; Follow-up; Event Ascertainment) |
| Martin (2001) <sup>82</sup>        | Prospective Cohort   | Prisoners                            | Spain                    | 1991 to 1999                 | Prison                                    | Active                  | Microbiological                   | TST (5mm)                                 | Low (Selection; Test Conduct; Follow-up; Event Ascertainment) |
| Martinez-Pino (2013) <sup>83</sup> | Prospective Cohort   | HIV                                  | Spain                    | 2004 to 2009                 | Hospitals                                 | Passive                 | Microbiological                   | TST (5mm)                                 | Moderate (Selection; Event Ascertainment)                     |
| Mazahir (2017) <sup>84</sup>       | Prospective Cohort   | Close Contacts Only                  | Egypt                    | 2014 to 2016                 | Tertiary Teaching Hospital                | Active                  | Microbiological and Clinical      | TST (10mm)                                | Moderate (Test Conduct; Follow-up)                            |
| Metin Timur (2014) <sup>85</sup>   | Prospective Cohort   | Children (<18 years)                 | Turkey                   | 2011 to 2014                 | Schools and Clinics                       | Active                  | Microbiological and Clinical      | TST (15mm), QFT-GIT                       | Moderate (Follow-up; Event Ascertainment)                     |
| Moon (2013) <sup>86</sup>          | Prospective Cohort   | Transplant                           | South Korea              | 2009 to 2011                 | Medical Centre                            | Active                  | Not Specified                     | TST (5, 10mm), QFT-GIT                    | Moderate (Follow-up; Event Ascertainment)                     |
| Moran-Mendoza (2007) <sup>87</sup> | Retrospective Cohort | Close and Casual Contacts (Together) | Canada                   | 1990 to 2001                 | Provincial (British Columbia) TB Registry | Passive                 | Microbiological and Clinical      | TST (5, 10, 15mm)                         | Low (Selection; Test Conduct; Follow-up)                      |
| Moss (2000) <sup>88</sup>          | Prospective Cohort   | Homeless, HIV                        | United States            | 1990 to 1996                 | Shelters and Food Lines                   | Passive                 | Microbiological and Clinical      | TST (5, 10mm)                             | Low (Selection; Test Conduct; Event Ascertainment)            |
| Moyo (2015) <sup>89</sup>          | Retrospective Cohort | Close and Casual Contacts (Together) | Australia                | 2005 to 2013                 | Provincial (Victoria) TB Registry         | Passive                 | Microbiological and Clinical      | TST (5mm)                                 | Low (Selection; Test Conduct; Event Ascertainment)            |
| Noorbakhsh (2011) <sup>90</sup>    | Prospective Cohort   | Close and Casual Contacts (Together) | Iran                     | 2006 to 2009                 | Hospital                                  | Active                  | Not Specified                     | QFT-G                                     | Low (Selection; Follow-up; Event Ascertainment)               |
| Ozgen (2018) <sup>91</sup>         | Retrospective Cohort | Transplant                           | Turkey                   | 2004 to 2013                 | Tertiary Teaching Hospital                | Passive                 | Microbiological and Clinical      | TST (15mm)                                | Low (Test Conduct; Follow-up; Event Ascertainment)            |
| Pai (2009) <sup>92</sup>           | Prospective Cohort   | Close Contacts Only                  | India                    | 2006 to 2007                 | Medical Institute                         | Active                  | Not Specified                     | TST (10mm), QFT-GIT                       | Moderate (Follow-up)                                          |
| Pullar (2014) <sup>93</sup>        | Prospective Cohort   | HIV                                  | Norway                   | 2009 to 2012                 | Outpatient Infectious Disease Clinics     | Active                  | Microbiological and Clinical      | QFT-GIT                                   | Moderate (Follow-up; Event Ascertainment)                     |

**Table S7. Detailed Individual Study Characteristics**

| Author (Year)                         | Study Design         | Population(s)                                             | Country or Region | Years Study Conducted | Study Setting                                   | Follow-up Method | Definition of Tuberculosis   | LTBI Diagnostic Test(s) Evaluated*    | Study Quality (Possible Biases)                               |
|---------------------------------------|----------------------|-----------------------------------------------------------|-------------------|-----------------------|-------------------------------------------------|------------------|------------------------------|---------------------------------------|---------------------------------------------------------------|
| Rakotosamimanana (2015) <sup>94</sup> | Prospective Cohort   | Close Contacts Only                                       | Madagascar        | Not Specified         | Entire City (Antananarivo)                      | Active           | Not Specified                | TST (5mm)                             | Moderate (Selection; Event Ascertainment)                     |
| Ringshausen (2013) <sup>95</sup>      | Prospective Cohort   | Occupational Risk Factor                                  | Germany           | 2008 to 2012          | Academic Institutions                           | Passive          | Microbiological              | QFT-GIT, T-SPOT. <i>TB</i>            | Moderate (Follow-up; Event Ascertainment)                     |
| Ringshausen (2009) <sup>96</sup>      | Prospective Cohort   | Occupational Risk Factor                                  | Germany           | 2007 to 2009          | Hospital                                        | Passive          | Not Specified                | TST (5, 10mm), QFT-GIT                | High (Event Ascertainment)                                    |
| Ringshausen (2010) <sup>97</sup>      | Prospective Cohort   | Occupational Risk Factor                                  | Germany           | 2005 to 2010          | Hospitals                                       | Passive          | Not Specified                | TST (5, 10mm), QFT-GIT                | Moderate (Test Conduct; Event Ascertainment)                  |
| Rueda (2014) <sup>98</sup>            | Prospective Cohort   | Prisoners                                                 | Colombia          | 2012 to 2014          | Prisons                                         | Active           | Microbiological              | TST (10mm)                            | Moderate (Selection; Follow-up)                               |
| Sanchez-Moya (2012) <sup>99</sup>     | Retrospective Cohort | Immune Suppressing Medications                            | Spain             | 2008 to 2011          | Biologic Therapy Registry                       | Passive          | Not Specified                | TST (5mm)                             | Low (Selection; Test Conduct; Follow-up; Event Ascertainment) |
| Saunders (2017) <sup>100</sup>        | Prospective Cohort   | Close Contacts Only                                       | Peru              | 2002 to 2016          | Single District (Ventanilla)                    | Passive          | Microbiological and Clinical | TST (5mm)                             | Low (Selection; Test Conduct; Follow-up)                      |
| Schablon (2014) <sup>101</sup>        | Prospective Cohort   | Occupational Risk Factor                                  | Germany           | 2006 to 2013          | Hospitals, Nursing Homes, Outpatient Care Units | Active           | Not Specified                | QFT-GIT                               | Low (Selection; Follow-up; Event Ascertainment)               |
| Sester (2014) <sup>102</sup>          | Prospective Cohort   | Immune Suppressing Medications, Transplant, HIV, Dialysis | Europe            | 2008 to 2013          | Healthcare Facilities                           | Active           | Not Specified                | TST (5mm), QFT-GIT, T-SPOT. <i>TB</i> | Low (Selection; Test Conduct; Follow-up; Event Ascertainment) |
| Sharma (2017) <sup>103</sup>          | Prospective Cohort   | Close Contacts Only                                       | India             | 2008 to 2014          | Tertiary Care Centre                            | Active           | Microbiological and Clinical | TST (10mm), QFT-GIT                   | High (Follow-up)                                              |
| Shu (2016) <sup>104</sup>             | Prospective Cohort   | Dialysis                                                  | Taiwan            | 2011 to 2015          | University Hospital                             | Passive          | Microbiological and Clinical | QFT-GIT                               | Moderate (Follow-up; Event Ascertainment)                     |
| Shu (2013) <sup>105</sup>             | Prospective Cohort   | Dialysis                                                  | Taiwan            | 2011 to 2012          | Tertiary Referral Hospital                      | Active           | Not Specified                | QFT-GIT                               | Low (Selection; Follow-up; Event Ascertainment)               |
| Silva (2014) <sup>106</sup>           | Prospective Cohort   | Immune Suppressing Medications                            | Brazil            | 2009 to 2012          | Hospitals                                       | Active           | Not Specified                | TST (5mm)                             | Low (Selection; Follow-up; Event Ascertainment)               |
| Singh (2013) <sup>107</sup>           | Prospective Cohort   | Close Contacts Only                                       | India             | 2007 to 2011          | Select DOTS Centres in South Delhi              | Active           | Microbiological              | TST (10mm)                            | Low (Test Conduct; Follow-up; Event Ascertainment)            |
| Snast (2018) <sup>108</sup>           | Retrospective Cohort | Immune Suppressing Medications                            | Israel            | 2005 to 2016          | Tertiary Dermatology Department Registry        | Active           | Not Specified                | TST (5mm)                             | Low (Selection; Test Conduct; Follow-up; Event Ascertainment) |
| Song (2014) <sup>109</sup>            | Prospective Cohort   | Close Contacts Only                                       | South Korea       | 2008 to 2012          | Middle and High Schools                         | Active           | Not Specified                | TST (10mm), QFT-GIT                   | Moderate (Follow-up; Event Ascertainment)                     |
| Song (2012) <sup>110</sup>            | Retrospective Cohort | Close and Casual Contacts (Together)                      | South Korea       | 2007 to 2009          | Schools                                         | Passive          | Not Specified                | TST (10mm), QFT-GIT                   | Low (Selection; Test Conduct; Follow-up; Event Ascertainment) |

**Table S7. Detailed Individual Study Characteristics**

| Author (Year)                      | Study Design         | Population(s)                        | Country or Region | Years Study Conducted | Study Setting                            | Follow-up Method | Definition of Tuberculosis   | LTBI Diagnostic Test(s) Evaluated* | Study Quality (Possible Biases)                               |
|------------------------------------|----------------------|--------------------------------------|-------------------|-----------------------|------------------------------------------|------------------|------------------------------|------------------------------------|---------------------------------------------------------------|
| Sun (2015) <sup>111</sup>          | Prospective Cohort   | HIV                                  | Taiwan            | 2011 to 2014          | University Hospital                      | Active           | Microbiological and Clinical | T-SPOT. <i>TB</i>                  | Moderate (Selection; Follow-up)                               |
| Torres Costa (2011) <sup>112</sup> | Retrospective Cohort | Occupational Risk Factor             | Portugal          | 2007 to 2010          | University Hospital                      | Passive          | Not Specified                | TST (10mm), QFT-GIT                | Moderate (Follow-up; Event Ascertainment)                     |
| Truong (1997) <sup>113</sup>       | Retrospective Cohort | Recent Immigrant/Refugee Arrivals    | United States     | 1992 to 1995          | Medical Centres                          | Active           | Microbiological              | TST (10mm)                         | Moderate (Follow-up; Event Ascertainment)                     |
| Tsou (2015) <sup>114</sup>         | Prospective Cohort   | Elderly (≥65 years)                  | Taiwan            | Not Specified         | Veteran Nursing Home                     | Active           | Microbiological              | TST (10mm), QFT-G                  | Moderate (Selection)                                          |
| Ward (2017) <sup>3</sup>           | Retrospective Cohort | Indigenous                           | Canada            | 1986 to 2002          | Provincial (Saskatchewan) TB Registry    | Passive          | Microbiological and Clinical | TST (10mm)                         | Low (Selection; Test Conduct; Follow-up; Event Ascertainment) |
| Xie (2011) <sup>115</sup>          | Prospective Cohort   | Immune Suppressing Medications       | China             | Not Specified         | Department of Rheumatology               | Active           | Not Specified                | TST (5mm)                          | Low (Selection; Follow-up; Event Ascertainment)               |
| Yang (2013) <sup>116</sup>         | Prospective Cohort   | HIV                                  | Taiwan            | 2008 to 2012          | HIV Outpatient Clinics                   | Active           | Microbiological              | TST (5mm), T-SPOT. <i>TB</i>       | High                                                          |
| Yoshiyama (2015) <sup>117</sup>    | Retrospective Cohort | Close and Casual Contacts (Together) | Japan             | 2010 to 2013          | Registry Review of Public Health Centres | Active           | Microbiological and Clinical | QFT-GIT                            | Moderate (Selection; Follow-up)                               |
| Yoshiyama (2010) <sup>118</sup>    | Retrospective Cohort | Close and Casual Contacts (Together) | Japan             | 2003 to 2007          | Registry Review of Public Health Centres | Active           | Microbiological and Clinical | QFT-G                              | Low (Selection; Test Conduct; Follow-up; Event Ascertainment) |
| Zellweger (2015) <sup>119</sup>    | Prospective Cohort   | Close and Casual Contacts (Together) | Europe            | 2009 to 2013          | Healthcare Facilities                    | Active           | Not Specified                | QFT-GIT, T-SPOT. <i>TB</i>         | Low (Selection; Test Conduct; Follow-up; Event Ascertainment) |
| Zenner (2017) <sup>120</sup>       | Retrospective Cohort | Recent Immigrant/Refugee Arrivals    | United Kingdom    | 1989 to 2014          | City (Blackburn) TB Registry             | Passive          | Microbiological and Clinical | TST (5mm), QFT-GIT                 | Low (Selection; Test Conduct; Follow-up; Event Ascertainment) |
| Zhang (2010) <sup>121</sup>        | Prospective Cohort   | HIV                                  | China             | 2006 to 2009          | Medical Centre                           | Active           | Microbiological and Clinical | T-SPOT. <i>TB</i>                  | Moderate (Selection; Follow-up)                               |
| Zhang (2013) <sup>122</sup>        | Prospective Cohort   | Occupational Risk Factor             | China             | 2005 to 2011          | General Hospital                         | Active           | Microbiological              | TST (10mm), T-SPOT. <i>TB</i>      | High (Selection)                                              |

Abbreviations: TB, tuberculosis; IRR, incidence rate ratio; QFT-GIT, Quantiferon Gold-In-Tube; TST, tuberculin skin test; BMI, body mass index; HIV, human immunodeficiency virus; BCG, Bacillus Calmette-Guérin vaccination.

\*Tests listed provided a large enough sample size for inclusion (i.e. ≥10 untreated, test-positive participants)

**Table S8. Information on LTBI Treatment Provided within Included Studies**

| Author (Year)                        | Study Design         | Population(s)                                                              | Was LTBI Treatment an Exclusion Criterion? | Were People Treated for LTBI Within the Study? | LTBI Treatment Information                                                                                                            | ≥20% Treated? |
|--------------------------------------|----------------------|----------------------------------------------------------------------------|--------------------------------------------|------------------------------------------------|---------------------------------------------------------------------------------------------------------------------------------------|---------------|
| <b>GENERAL POPULATION STUDIES</b>    |                      |                                                                            |                                            |                                                |                                                                                                                                       |               |
| Cook (2008) <sup>1</sup>             | Retrospective Cohort | Low-Risk Tuberculin Reactors                                               | No                                         | Yes                                            | 1487 of 26,522 test-positive people received treatment (6%)                                                                           | No            |
| Horsburgh (2009) <sup>2</sup>        | Retrospective Cohort | HIV-Uninfected, United States Born Tuberculin Reactors                     | No                                         | Yes                                            | 11% of test-positive people had received treatment                                                                                    | No            |
| Ward (2017) <sup>3</sup>             | Retrospective Cohort | Non-Indigenous Canadian-Born Tuberculin Reactors                           | Yes                                        | No                                             | 1677 test-positive persons were excluded and 11,698 included (14% of possible people included were excluded due to treatment)         | No            |
| <b>AT-RISK POPULATION STUDIES</b>    |                      |                                                                            |                                            |                                                |                                                                                                                                       |               |
| Abubakar (2018) <sup>4</sup>         | Prospective Cohort   | Close and Casual Contacts (Together) and Recent Immigrant/Refugee Arrivals | Yes                                        | No                                             | 260 of the 10,045 (3%) people recruited to the study were excluded due to LTBI treatment, all are presumed to have been test-positive | No            |
| Agarwal (2010) <sup>5</sup>          | Prospective Cohort   | Transplant                                                                 | Yes                                        | No                                             | 212 people receiving treatment as part of a clinical trial were excluded of 554 possible patients to include (38%)                    | Yes           |
| Aichelburg (2014) <sup>6</sup>       | Prospective Cohort   | HIV                                                                        | No                                         | No                                             | Treatment recommended, but not reported to be given                                                                                   | No            |
| Aki (2018) <sup>7</sup>              | Retrospective Cohort | Transplant                                                                 | No                                         | Yes                                            | Of 224 people with TST 5mm or greater, 124 (55%) were treated; of 160 people with TST 10mm or greater, 97 were treated (61%)          | Yes           |
| Al Kubaisy (2003) <sup>8</sup>       | Prospective Cohort   | Children (<18 years)                                                       | No                                         | No                                             | Participants were treated at conclusion of study.                                                                                     | No            |
| Altet (2015) <sup>9</sup>            | Prospective Cohort   | Close Contacts Only                                                        | No                                         | Yes                                            | Of 453 IGRA positive people, 372 (78%) were treated; of the 797 people with TST 5mm or greater, 457 (57%) were treated.               | Yes           |
| Anger (2012) <sup>10</sup>           | Retrospective Cohort | Close and Casual Contacts (Together)                                       | No                                         | Yes                                            | Of 7597 test-positive people, 6001 (79% were treated).                                                                                | Yes           |
| Arroyave (2017) <sup>11</sup>        | Prospective Cohort   | Prisoners                                                                  | No                                         | No                                             | No treatment provided.                                                                                                                | No            |
| Bakir (2008) <sup>12</sup>           | Prospective Cohort   | Close Contacts Only                                                        | No                                         | Yes                                            | Of the 44 people TSPOT-positive and TST less than 10mm included, 18 (41%) were treated                                                | Yes           |
| Baliashvili (2018) <sup>13</sup>     | Retrospective Cohort | Close Contacts Only                                                        | No                                         | No                                             | No treatment provided                                                                                                                 | No            |
| Benito (2002) <sup>14</sup>          | Retrospective Cohort | Transplant                                                                 | No                                         | Yes                                            | Of 89 people TST positive, 16 (18%) were treated                                                                                      | No            |
| Bergot (2012) <sup>15</sup>          | Prospective Cohort   | Close and Casual Contacts (Together)                                       | No                                         | Yes                                            | Of the 148 people IGRA positive, 97 (66%) were treated                                                                                | Yes           |
| Bourgarit (2015) <sup>16</sup>       | Prospective Cohort   | HIV                                                                        | No                                         | Yes                                            | Not clearly reported by test, however 13 (33%) of 39 people with a positive IGRA were treated                                         | Yes           |
| Bradshaw (2011) <sup>17</sup>        | Prospective Cohort   | Close and Casual Contacts (Together)                                       | No                                         | No                                             | No treatment provided                                                                                                                 | No            |
| Cailleaux-Cezar (2009) <sup>18</sup> | Retrospective Cohort | Close and Casual Contacts (Together)                                       | Yes                                        | No                                             | Of the 1178 contacts who could have been included, 63 (5%) were excluded due to treatment of LTBI                                     | No            |
| Chakhaia (2014) <sup>19</sup>        | Retrospective Cohort | Close Contacts Only                                                        | No                                         | Yes                                            | Of the 212 TST positive people, 41 (19%) were treated                                                                                 | No            |
| Chang (2011) <sup>20</sup>           | Prospective Cohort   | Immune Suppressing Medications                                             | No                                         | Yes                                            | All patients IGRA-positive were treated (n=36). Only those IGRA-negative and TST greater than 10mm were untreated                     | No            |
| Chan-Yeung (2007) <sup>21</sup>      | Prospective Cohort   | Elderly (≥65 years)                                                        | No                                         | No                                             | No treatment provided                                                                                                                 | Yes           |
| Chee (2004) <sup>22</sup>            | Prospective Cohort   | Close Contacts Only                                                        | No                                         | Yes                                            | Of 2078 people with TST 10mm or greater, 874 (42%) were treated                                                                       | No            |
| Chigbu (2010) <sup>23</sup>          | Prospective Cohort   | Prisoners                                                                  | No                                         | No                                             | No treatment provided                                                                                                                 | No            |
| Christopoulos (2009) <sup>24</sup>   | Prospective Cohort   | Dialysis                                                                   | No                                         | No                                             | No treatment provided                                                                                                                 | No            |
| Chung (2010) <sup>25</sup>           | Prospective Cohort   | Dialysis                                                                   | No                                         | No                                             | No treatment provided                                                                                                                 | No            |
| Daley (1998) <sup>26</sup>           | Prospective Cohort   | Injection Drug Users, HIV                                                  | No                                         | Yes                                            | Among those with HIV, 68 (71%) of 96 people were treated; among HIV-uninfected, 199 (61%) of 324 were treated.                        | Yes           |

**Table S8. Information on LTBI Treatment Provided within Included Studies**

| <b>Author (Year)</b>                | <b>Study Design</b>  | <b>Population(s)</b>                                                 | <b>Was LTBI Treatment an Exclusion Criterion?</b> | <b>Were People Treated for LTBI Within the Study?</b> | <b>LTBI Treatment Information</b>                                                                                                                                         | <b>≥20% Treated?</b> |
|-------------------------------------|----------------------|----------------------------------------------------------------------|---------------------------------------------------|-------------------------------------------------------|---------------------------------------------------------------------------------------------------------------------------------------------------------------------------|----------------------|
| Denholm (2012) <sup>27</sup>        | Retrospective Cohort | Close and Casual Contacts (Together)                                 | No                                                | Yes                                                   | Of 49 TST positive contacts, 11 (22%) received appropriate preventative treatment                                                                                         | Yes                  |
| Diel (2011) <sup>28</sup>           | Prospective Cohort   | Close Contacts Only                                                  | No                                                | Yes                                                   | Of 314 contacts IGRA-positive, 67 (21%) received treatment.                                                                                                               | Yes                  |
| Dobler (2013) <sup>29</sup>         | Retrospective Cohort | Close and Casual Contacts (Together)                                 | No                                                | Yes                                                   | Of 4351 people test-positive, 409 (9%) received treatment                                                                                                                 | No                   |
| Dogan (2009) <sup>30</sup>          | Prospective Cohort   | Dialysis                                                             | No                                                | No                                                    | No treatment provided                                                                                                                                                     | No                   |
| Edathodu (2017) <sup>31</sup>       | Prospective Cohort   | Transplant                                                           | No                                                | Yes                                                   | In the research study of 70 positive people, only 1 (2%) received treatment                                                                                               | No                   |
| Elliot (2018) <sup>32</sup>         | Retrospective Cohort | Recent Immigrant/Refugee Arrivals                                    | No                                                | Yes                                                   | Among those positive by TST, 23 (34%) of 67 received treatment                                                                                                            | Yes                  |
| Elzi (2007) <sup>33</sup>           | Prospective Cohort   | HIV                                                                  | No                                                | Yes                                                   | While unclear if they were all test-positive, 193 people were treated and 246 people were untreated and TST positive. Assuming all treated were TST positive, this is 44% | Yes                  |
| Espinal (2000) <sup>34</sup>        | Case-Control         | Close Contacts Only                                                  | No                                                | No                                                    | No treatment provided                                                                                                                                                     | No                   |
| Fang (2002) <sup>35</sup>           | Prospective Cohort   | Dialysis                                                             | No                                                | No                                                    | No treatment provided                                                                                                                                                     | No                   |
| Fournier (2015) <sup>36</sup>       | Prospective Cohort   | Close and Casual Contacts (Together)                                 | No                                                | Yes                                                   | If 159 IGRA positive people, 97 (61%) were treated                                                                                                                        | Yes                  |
| Franken (2008) <sup>37</sup>        | Prospective Cohort   | Close and Casual Contacts (Together)                                 | No                                                | Yes                                                   | Of 122 people with TST 15mm or greater, 51 (42%) were treated                                                                                                             | Yes                  |
| Gao (2017) <sup>38</sup>            | Prospective Cohort   | Diabetes, Elderly (≥65 years), BMI <18.5 kg/m <sup>2</sup> , Smokers | No                                                | No                                                    | No treatment provided                                                                                                                                                     | No                   |
| Garie (2011) <sup>39</sup>          | Prospective Cohort   | Close Contacts Only                                                  | No                                                | Yes                                                   | Only children <5 years were treated, accounting for 82 (44%) of 184 people included                                                                                       | Yes                  |
| Girardi (1997) <sup>40</sup>        | Prospective Cohort   | HIV                                                                  | No                                                | Yes                                                   | When treatment provided, patient follow-up was censored. Number initiating treatment not reported                                                                         | No                   |
| Golub (2015) <sup>41</sup>          | RCT                  | HIV                                                                  | No                                                | Yes                                                   | Of the 1954 test-positive patients, 1601 (82%) were treated                                                                                                               | Yes                  |
| Gómez-Reino (2007) <sup>42</sup>    | Retrospective Cohort | Immune Suppressing Medications                                       | No                                                | Yes                                                   | Of 1012 people test-positive, 956 (94%) were treated                                                                                                                      | Yes                  |
| Grinsdale (2016) <sup>43</sup>      | Retrospective Cohort | Children (<18 years), Young Children (<5 years)                      | No                                                | Yes                                                   | The test result of treated individuals was not reported, but only 11 untreated positive people remained and 109 were treated. Assuming all were positive, this is 91%     | Yes                  |
| Guirao-Arrabal (2016) <sup>44</sup> | Retrospective Cohort | Transplant                                                           | No                                                | Yes                                                   | Of 70 test-positive people, 30 (43%) were treated                                                                                                                         | Yes                  |
| Haldar (2013) <sup>45</sup>         | Prospective Cohort   | Close Contacts Only                                                  | No                                                | Yes                                                   | Of 215 test-positive people, 98 (46%) were treated                                                                                                                        | Yes                  |
| Hand (2018) <sup>46</sup>           | Retrospective Cohort | Transplant                                                           | No                                                | Yes                                                   | Of 20 test-positive people, 3 (15%) were treated                                                                                                                          | No                   |
| Harstad (2010) <sup>47</sup>        | Retrospective Cohort | Recent Immigrant/Refugee Arrivals                                    | No                                                | Yes                                                   | Of 246 test-positive people, 8 (3%) were treated                                                                                                                          | No                   |
| Hemmati (2011) <sup>48</sup>        | Prospective Cohort   | Children (<18 years)                                                 | No                                                | No                                                    | No treatment provided                                                                                                                                                     | No                   |
| Higuchi (2009) <sup>49</sup>        | Prospective Cohort   | Close and Casual Contacts (Together)                                 | No                                                | Yes                                                   | Only 9 IGRA positive were indicated treatment, this included 6 (3%) of the 200 people with TST greater than 5mm.                                                          | No                   |
| Hill (2007) <sup>50</sup>           | Prospective Cohort   | Close and Casual Contacts (Together)                                 | No                                                | No                                                    | No treatment provided                                                                                                                                                     | No                   |
| Huang (2018) <sup>51</sup>          | Retrospective Cohort | Immune Suppressing Medications                                       | No                                                | Yes                                                   | Of 67 test-positive people, 43 (64%) were treated                                                                                                                         | Yes                  |
| Huerga (2019) <sup>52</sup>         | Prospective Cohort   | Close Contacts Only                                                  | No                                                | No                                                    | No treatment provided                                                                                                                                                     | No                   |

**Table S8. Information on LTBI Treatment Provided within Included Studies**

| Author (Year)                   | Study Design         | Population(s)                                                  | Was LTBI Treatment an Exclusion Criterion? | Were People Treated for LTBI Within the Study? | LTBI Treatment Information                                                                                   | ≥20% Treated? |
|---------------------------------|----------------------|----------------------------------------------------------------|--------------------------------------------|------------------------------------------------|--------------------------------------------------------------------------------------------------------------|---------------|
| Jambaldorj (2017) <sup>53</sup> | Retrospective Cohort | Transplant                                                     | Yes                                        | No                                             | Of 458 people included, 12 were excluded due to treatment (3%) given based on abnormal chest radiograph      | No            |
| Jeyakumar (1999) <sup>54</sup>  | Retrospective Cohort | Occupational Risk Factor                                       | No                                         | No                                             | No treatment provided                                                                                        | No            |
| Jo (2013) <sup>55</sup>         | Retrospective Cohort | Immune Suppressing Medications                                 | No                                         | Yes                                            | There were 6 (27%) of 22 TST-positive people treated and 7 (18%) of 38 TSPOT positive people treated         | No            |
| Joshi (2011) <sup>56</sup>      | Prospective Cohort   | Occupational Risk Factor                                       | No                                         | Yes                                            | There were 10 people treated of 275 TST-positive and 279 IGRA-positive people. This is 4% in each group      | No            |
| Jung (2012) <sup>57</sup>       | Retrospective Cohort | Transplant                                                     | No                                         | No                                             | No treatment provided                                                                                        | No            |
| Kik (2010) <sup>58</sup>        | Prospective Cohort   | Close Contacts Only                                            | Yes                                        | No                                             | 17 of 812 close contacts were excluded because preventive treatment was started (2%)                         | No            |
| Kim (2015) <sup>59</sup>        | Retrospective Cohort | Immune Suppressing Medications                                 | No                                         | Yes                                            | Of 244 TST positive people, 211 (86%) received treatment                                                     | Yes           |
| Kim (2017) <sup>60</sup>        | Prospective Cohort   | Occupational Risk Factor                                       | No                                         | Yes                                            | Of 41 test-positive people, 12 (29%) were treated                                                            | Yes           |
| Kim (2015) <sup>61</sup>        | RCT                  | Transplant                                                     | No                                         | Yes                                            | 131 of 263 people were treated in this RCT (50%)                                                             | No            |
| Kim (2011) <sup>62</sup>        | Prospective Cohort   | Transplant                                                     | No                                         | Yes                                            | Of 89 people IGRA positive, 18 (20%) were treated. All TST positive were treated                             | Yes           |
| Kim (2015) <sup>63</sup>        | Retrospective Cohort | Close and Casual Contacts (Together)                           | No                                         | Yes                                            | 513 (96%) of 534 IGRA-positive people were treated. 513 (29%) of 1761 TST-positive were treated              | Yes           |
| Kruczak (2014) <sup>64</sup>    | Prospective Cohort   | Close and Casual Contacts (Together), Homeless, Long Term Care | No                                         | No                                             | No treatment provided                                                                                        | No            |
| Laffitte (2009) <sup>65</sup>   | Retrospective Cohort | Immune Suppressing Medications                                 | No                                         | Yes                                            | Of 20 people TST positive, 10 were treated (50%); all IGRA positive treated                                  | Yes           |
| Lange (2012) <sup>66</sup>      | Retrospective Cohort | Transplant                                                     | No                                         | No                                             | No treatment provided                                                                                        | No            |
| Lee (2012) <sup>67</sup>        | Prospective Cohort   | Close Contacts Only                                            | No                                         | Yes                                            | Of 123 TST positive, 101 (82%) were treated. Of 117 IGRA positive, 101 (86%) were treated                    | Yes           |
| Lee (2014) <sup>68</sup>        | Prospective Cohort   | Transplant                                                     | Yes                                        | No                                             | Of 409 possibly included patients, 5 were excluded due to treatment (1%)                                     | No            |
| Lee (2015) <sup>69</sup>        | Retrospective Cohort | Immune Suppressing Medications                                 | No                                         | Yes                                            | 60 (49%) of 122 TST positive received treatment and all IGRA-positive received treatment                     | Yes           |
| Lee (2019) <sup>70</sup>        | Retrospective Cohort | HIV                                                            | No                                         | Yes                                            | Of 62 positive people, 25 (40%) were treated.                                                                | Yes           |
| Lee (2015) <sup>71</sup>        | Prospective Cohort   | HIV                                                            | No                                         | Yes                                            | When treatment provided, patient follow-up was censored. Number initiating treatment not reported            | No            |
| Lee (2009) <sup>72</sup>        | Prospective Cohort   | Dialysis                                                       | No                                         | No                                             | No treatment provided                                                                                        | No            |
| Leow (2014) <sup>73</sup>       | Prospective Cohort   | Diabetes                                                       | No                                         | No                                             | No treatment provided                                                                                        | No            |
| Leung (2007) <sup>74</sup>      | Prospective Cohort   | Silicosis                                                      | No                                         | Yes                                            | Of 317 positive people, 101 (32%) were treated                                                               | Yes           |
| Leung (2012) <sup>75</sup>      | Prospective Cohort   | Children (<18 years)                                           | No                                         | No                                             | No treatment provided                                                                                        | No            |
| Leung (2015) <sup>76</sup>      | Prospective Cohort   | Close Contacts Only                                            | No                                         | Yes                                            | Of 343 with a positive IGRA, 99 (29%) were treated. Of 670 with a TST 5mm or greater, 167 were treated (25%) | Yes           |
| Leung (2010) <sup>77</sup>      | Prospective Cohort   | Silicosis                                                      | No                                         | Yes                                            | Of 204 with a positive IGRA, 53 (26%) were treated. Of 228 with a TST 5mm or greater, 67 (29%) were treated  | Yes           |
| Lienhardt (2010) <sup>78</sup>  | Prospective Cohort   | Close Contacts Only                                            | No                                         | No                                             | No treatment provided to tested population                                                                   | No            |
| Ling (2011) <sup>79</sup>       | Retrospective Cohort | Close and Casual Contacts (Together)                           | No                                         | No                                             | No treatment provided                                                                                        | No            |
| Luabeya (2015) <sup>80</sup>    | Prospective Cohort   | Young Children (<5 years)                                      | No                                         | Yes                                            | Of 279 positive people, 73 (26%) were treated                                                                | Yes           |

**Table S8. Information on LTBI Treatment Provided within Included Studies**

| Author (Year)                         | Study Design         | Population(s)                                             | Was LTBI Treatment an Exclusion Criterion? | Were People Treated for LTBI Within the Study? | LTBI Treatment Information                                                                                                                                       | ≥20% Treated?          |
|---------------------------------------|----------------------|-----------------------------------------------------------|--------------------------------------------|------------------------------------------------|------------------------------------------------------------------------------------------------------------------------------------------------------------------|------------------------|
| Marks (2000) <sup>81</sup>            | Retrospective Cohort | Recent Immigrant/Refugee Arrivals                         | Yes                                        | No                                             | Not explicitly stated how many were excluded due to this reason, but can estimate <16% based on those included                                                   | No                     |
| Martin (2001) <sup>82</sup>           | Prospective Cohort   | Prisoners                                                 | No                                         | Yes                                            | Of 632 TST positive people, 146 (23%) were treated                                                                                                               | Yes                    |
| Martinez-Pino (2013) <sup>83</sup>    | Prospective Cohort   | HIV                                                       | No                                         | Yes                                            | Of 428 test-positive people, 229 (54%) were treated                                                                                                              | Yes                    |
| Mazahir (2017) <sup>84</sup>          | Prospective Cohort   | Close Contacts Only                                       | No                                         | Yes                                            | No treatment provided to those ≥6 years. Of 19 positive people, 4 (21%) were treated                                                                             | Yes                    |
| Metin Timur (2014) <sup>85</sup>      | Prospective Cohort   | Children (<18 years)                                      | No                                         | Yes                                            | Of 12 IGRA positive, 8 (67%) were treated. 69 people who were TST positive and IGRA negative were not treated                                                    | Yes (IGRA)<br>No (TST) |
| Moon (2013) <sup>86</sup>             | Prospective Cohort   | Transplant                                                | No                                         | No                                             | No treatment provided                                                                                                                                            | No                     |
| Moran-Mendoza (2007) <sup>87</sup>    | Retrospective Cohort | Close and Casual Contacts (Together)                      | Yes                                        | No                                             | Of 33,146 people possibly included, 6604 (20%) were treated                                                                                                      | Yes                    |
| Moss (2000) <sup>88</sup>             | Prospective Cohort   | Homeless, HIV                                             | No                                         | Yes                                            | Of 695 HIV-negative, test-positive people, 63 (9%) were treated; number assumed based on enrollment in subsequent treatment trial                                | No                     |
| Moyo (2015) <sup>89</sup>             | Retrospective Cohort | Close and Casual Contacts (Together)                      | No                                         | No                                             | No treatment provided                                                                                                                                            | No                     |
| Noorbakhsh (2011) <sup>90</sup>       | Prospective Cohort   | Close and Casual Contacts (Together)                      | No                                         | No                                             | No treatment provided                                                                                                                                            | No                     |
| Ozgen (2018) <sup>91</sup>            | Retrospective Cohort | Transplant                                                | No                                         | No                                             | No treatment provided                                                                                                                                            | No                     |
| Pai (2009) <sup>92</sup>              | Prospective Cohort   | Close Contacts Only                                       | No                                         | No                                             | No treatment provided                                                                                                                                            | No                     |
| Pullar (2014) <sup>93</sup>           | Prospective Cohort   | HIV                                                       | No                                         | Yes                                            | Of 43 with positive IGRA, 7 were excluded due to TB, leaving 36 positive; estimating the number of these treated from the data presented, 13 (36%) were treated  | Yes                    |
| Rakotosamimanana (2015) <sup>94</sup> | Prospective Cohort   | Close Contacts Only                                       | No                                         | No                                             | No treatment provided                                                                                                                                            | No                     |
| Ringshausen (2013) <sup>95</sup>      | Prospective Cohort   | Occupational Risk Factor                                  | No                                         | No                                             | No treatment provided                                                                                                                                            | No                     |
| Ringshausen (2009) <sup>96</sup>      | Prospective Cohort   | Occupational Risk Factor                                  | No                                         | Yes                                            | Of 13 positive people, 1 (8%) received treatment                                                                                                                 | No                     |
| Ringshausen (2010) <sup>97</sup>      | Prospective Cohort   | Occupational Risk Factor                                  | No                                         | No                                             | No treatment provided until end of study                                                                                                                         | No                     |
| Rueda (2014) <sup>98</sup>            | Prospective Cohort   | Prisoners                                                 | No                                         | No                                             | No treatment provided                                                                                                                                            | No                     |
| Sanchez-Moya (2012) <sup>99</sup>     | Retrospective Cohort | Immune Suppressing Medications                            | No                                         | Yes                                            | Of 163 positive people, 140 (86%) were treated                                                                                                                   | Yes                    |
| Saunders (2017) <sup>100</sup>        | Prospective Cohort   | Close Contacts Only                                       | No                                         | No                                             | No treatment provided                                                                                                                                            | No                     |
| Schablon (2014) <sup>101</sup>        | Prospective Cohort   | Occupational Risk Factor                                  | No                                         | Yes                                            | Of 75 positive people, 1 (2%) received treatment                                                                                                                 | No                     |
| Sester (2014) <sup>102</sup>          | Prospective Cohort   | Immune Suppressing Medications, Transplant, HIV, Dialysis | No                                         | Yes                                            | Across all groups included, treatment was given to 47 (24%) of 196 TST positive, 56 (26%) of 215 QuantiFERON-TB positive, and 54 (22%) of 247 T-SPOT.TB positive | Yes                    |
| Sharma (2017) <sup>103</sup>          | Prospective Cohort   | Close Contacts Only                                       | No                                         | No                                             | No treatment provided                                                                                                                                            | No                     |
| Shu (2016) <sup>104</sup>             | Prospective Cohort   | Dialysis                                                  | No                                         | No                                             | No treatment provided                                                                                                                                            | No                     |
| Shu (2013) <sup>105</sup>             | Prospective Cohort   | Dialysis                                                  | No                                         | No                                             | No treatment provided                                                                                                                                            | No                     |
| Silva (2014) <sup>106</sup>           | Prospective Cohort   | Immune Suppressing Medications                            | No                                         | No                                             | No treatment provided                                                                                                                                            | No                     |
| Singh (2013) <sup>107</sup>           | Prospective Cohort   | Close Contacts Only                                       | No                                         | No                                             | No treatment provided                                                                                                                                            | No                     |
| Snast (2018) <sup>108</sup>           | Retrospective Cohort | Immune Suppressing Medications                            | No                                         | Yes                                            | Of 78 test positive people, 39 (50%) were treated                                                                                                                | Yes                    |

**Table S8. Information on LTBI Treatment Provided within Included Studies**

| Author (Year)                      | Study Design         | Population(s)                        | Was LTBI Treatment an Exclusion Criterion? | Were People Treated for LTBI Within the Study? | LTBI Treatment Information                                                                                                            | ≥20% Treated?          |
|------------------------------------|----------------------|--------------------------------------|--------------------------------------------|------------------------------------------------|---------------------------------------------------------------------------------------------------------------------------------------|------------------------|
| Song (2014) <sup>109</sup>         | Prospective Cohort   | Close Contacts Only                  | No                                         | Yes                                            | Of 661 people with a positive TST, 215 (33%) were treated. Of 317 people with a positive IGRA, 215 (68%) were treated                 | Yes                    |
| Song (2012) <sup>110</sup>         | Retrospective Cohort | Close and Casual Contacts (Together) | No                                         | Yes                                            | Of 270 people with a positive TST, 171 (63%) were treated. Of 203 with a positive IGRA, 171 (84%) were treated                        | Yes                    |
| Sun (2015) <sup>111</sup>          | Prospective Cohort   | HIV                                  | No                                         | Yes                                            | No treatment provided to those who tested positive                                                                                    | No                     |
| Torres Costa (2011) <sup>112</sup> | Retrospective Cohort | Occupational Risk Factor             | No                                         | No                                             | No treatment provided                                                                                                                 | No                     |
| Truong (1997) <sup>113</sup>       | Retrospective Cohort | Recent Immigrant/Refugee Arrivals    | No                                         | Yes                                            | Of 160 test-positive people, 110 (69%) received treatment                                                                             | Yes                    |
| Tsou (2015) <sup>114</sup>         | Prospective Cohort   | Elderly (≥65 years)                  | No                                         | No                                             | No treatment provided                                                                                                                 | No                     |
| Ward (2017) <sup>3</sup>           | Retrospective Cohort | Indigenous                           | Yes                                        | No                                             | 1677 test-positive persons were excluded and 11,698 included (14% of possible people included were excluded due to treatment)         | No                     |
| Xie (2011) <sup>115</sup>          | Prospective Cohort   | Immune Suppressing Medications       | No                                         | Yes                                            | Of 12 people with TST greater than 5mm, 2 (17%) received treatment                                                                    | No                     |
| Yang (2013) <sup>116</sup>         | Prospective Cohort   | HIV                                  | No                                         | Yes                                            | Of 227 people TST-positive, 87 (38%) were treated. Of 134 people with a positive IGRA, 49 (37%) were treated                          | Yes                    |
| Yoshiyama (2015) <sup>117</sup>    | Retrospective Cohort | Close and Casual Contacts (Together) | No                                         | Yes                                            | Of 168 people with a positive IGRA, 107 (64%) were treated                                                                            | Yes                    |
| Yoshiyama (2010) <sup>118</sup>    | Retrospective Cohort | Close and Casual Contacts (Together) | No                                         | Yes                                            | Of 419 people with a positive IGRA, 323 (77%) were treated                                                                            | Yes                    |
| Zellweger (2015) <sup>119</sup>    | Prospective Cohort   | Close and Casual Contacts (Together) | No                                         | Yes                                            | Of 904 people with a positive QuantiFERON-TB, 481 (53%) were treated; of 281 people with a positive T-SPOT.TB, 208 (74%) were treated | Yes                    |
| Zenner (2017) <sup>120</sup>       | Retrospective Cohort | Recent Immigrant/Refugee Arrivals    | No                                         | Yes                                            | Of 366 IGRA positive people, 243 (66%) were treated; no TST positive person was treated                                               | Yes (IGRA)<br>No (TST) |
| Zhang (2010) <sup>121</sup>        | Prospective Cohort   | HIV                                  | No                                         | No                                             | No treatment provided                                                                                                                 | No                     |
| Zhang (2013) <sup>122</sup>        | Prospective Cohort   | Occupational Risk Factor             | No                                         | No                                             | No treatment provided                                                                                                                 | No                     |

Abbreviations: TB, tuberculosis; IGRA, interferon-gamma release assay; LTBI, latent tuberculosis infection; HIV, human immunodeficiency virus.



**Table S9. Study Characteristics and Outcomes Among Test-Positive Persons**

| Author (Year)                        | Mean or Median Age (Years) <sup>†</sup> | Population Evaluated*          | Positive Test Definition and Untreated Population Size | Mean or Median Individual FU (Months) | TB Events (Cumulative Incidence) | Total FU Time (Person Years) | TB Rate per 1000 Person Years (95% CI) | IRR Compared to Test Negative (95% CI) |
|--------------------------------------|-----------------------------------------|--------------------------------|--------------------------------------------------------|---------------------------------------|----------------------------------|------------------------------|----------------------------------------|----------------------------------------|
| <b>GENERAL POPULATION STUDIES</b>    |                                         |                                |                                                        |                                       |                                  |                              |                                        |                                        |
| Cook (2008) <sup>1</sup>             | 32                                      | Tuberculin Reactors            | TST ≥10mm: 25,035                                      | 84                                    | 7 (0.03%)                        | 175,245                      | 0.04 (0.02–0.08)                       | Not estimated                          |
| Horsburgh (2009) <sup>2</sup>        | NR                                      | Tuberculin Reactors            | TST ≥10mm: 2952                                        | 60                                    | 10 (0.3%)                        | 14,759                       | 0.68 (0.47–0.88)                       | Not estimated                          |
| Ward (2017) <sup>3</sup>             | NR                                      | Tuberculin Reactors            | TST ≥10mm: 5824                                        | 121.7                                 | 38 (0.7%)                        | 59,089                       | 0.64 (0.36–1.26)                       | Not estimated                          |
| <b>AT-RISK POPULATION STUDIES</b>    |                                         |                                |                                                        |                                       |                                  |                              |                                        |                                        |
| Abubakar (2018) <sup>4</sup>         | 32.5                                    | All Contacts                   | QFT-GIT+: 793                                          | 39.6                                  | 30 (3.8%)                        | 2613.8                       | 11.5 (8–16.4)                          | 5.1 (2.9–8.8)                          |
|                                      |                                         | All Contacts                   | TSPOT+: 648                                            | 38.9                                  | 31 (4.8%)                        | 2100.1                       | 14.8 (10.4–21)                         | 7.2 (4.1–12.5)                         |
|                                      |                                         | All Contacts                   | TST ≥5mm: 1704                                         | 39                                    | 43 (2.5%)                        | 5542.3                       | 7.8 (5.8–10.5)                         | 5.9 (2.8–12.3)                         |
|                                      |                                         | All Contacts                   | TST ≥10mm: 1323                                        | 38.8                                  | 38 (2.9%)                        | 4280.7                       | 8.9 (6.5–12.2)                         | 5.1 (2.7–9.5)                          |
|                                      |                                         | Recent Immigrants              | QFT-GIT+: 651                                          | 37.5                                  | 17 (2.6%)                        | 2036                         | 8.3 (5.2–13.4)                         | 6 (2.7–13.2)                           |
|                                      |                                         | Recent Immigrants              | TSPOT+: 587                                            | 37.3                                  | 21 (3.6%)                        | 1826                         | 11.5 (7.5–17.6)                        | 14.6 (5.7–37.3)                        |
|                                      |                                         | Recent Immigrants              | TST ≥5mm: 1253                                         | 37.1                                  | 21 (1.7%)                        | 3874.5                       | 5.4 (3.5–8.3)                          | 4.8 (1.9–12.3)                         |
|                                      |                                         | Recent Immigrants              | TST ≥10mm: 828                                         | 36.8                                  | 20 (2.4%)                        | 2541.6                       | 7.9 (5.1–12.2)                         | 7.6 (3.1–18.3)                         |
| Agarwal (2010) <sup>5</sup>          | 38.3                                    | Transplant                     | TST ≥10mm: 21                                          | 24                                    | 5 (23.8%)                        | 42                           | 119 (49.6–286)                         | 3.2 (1.2–8.2)                          |
| Aichelburg (2014) <sup>6</sup>       | 39.6                                    | HIV                            | QFT-GIT+: 76                                           | 20.2                                  | 7 (9.2%)                         | 127.93                       | 54.7 (26.1–114.8)                      | 20.2 (5.7–72)                          |
| Aki (2018) <sup>7</sup>              | 43                                      | Transplant                     | TST ≥5mm: 100                                          | 29                                    | 0 (0%)                           | 241.7                        | 0                                      | 1 event among negative                 |
|                                      |                                         | Transplant                     | TST ≥10mm: 63                                          | 29                                    | 0 (0%)                           | 152.3                        | 0                                      | 1 event among negative                 |
| Al Kubaisy (2003) <sup>8</sup>       | NR                                      | All Contacts                   | TST ≥10mm: 191                                         | 24                                    | 9 (4.7%)                         | 382                          | 23.6 (12.3–45.3)                       | Not estimated                          |
| Altet (2015) <sup>9</sup>            | NR                                      | Close Contacts Only            | QFT-GIT+: 81                                           | 48                                    | 14 (17.3%)                       | 324                          | 43.2 (25.6–73)                         | 0 events among negative                |
|                                      |                                         | Close Contacts Only            | TST ≥5mm: 340                                          | 48                                    | 14 (4.1%)                        | 1360                         | 10.3 (6.1–17.4)                        | 0 events among negative                |
|                                      |                                         | Close Contacts Only            | TST ≥10mm: 233                                         | 48                                    | 13 (5.6%)                        | 932                          | 13.9 (8.1–24)                          | 8.5 (1.6–45.9)                         |
|                                      |                                         | Close Contacts Only            | TST ≥15mm: 107                                         | 48                                    | 11 (10.3%)                       | 428                          | 25.7 (14.2–46.4)                       | 10.6 (3.2–35.2)                        |
| Anger (2012) <sup>10</sup>           | NR                                      | All Contacts                   | TST ≥5mm: 1596                                         | 46.9                                  | 24 (1.5%)                        | 6250                         | 3.8 (2.6–5.7)                          | 12.8 (6.9–23.7)                        |
|                                      |                                         | All Contacts (Age<18)          | TST ≥5mm: 92                                           | 46.9                                  | 4 (4.3%)                         | 359.6                        | 11.1 (4.2–29.6)                        | Not estimated                          |
|                                      |                                         | All Contacts (Age<5)           | TST ≥5mm: 11                                           | 46.9                                  | 2 (18.2%)                        | 43                           | 46.5 (11.6–186)                        | Not estimated                          |
|                                      |                                         | All Contacts (Age≥65)          | TST ≥5mm: 177                                          | 46.9                                  | 4 (2.3%)                         | 691.8                        | 5.8 (2.2–15.4)                         | Not estimated                          |
| Arroyave (2017) <sup>11</sup>        | NR                                      | Prisoners                      | TST ≥10mm: 38                                          | 24                                    | 9 (23.7%)                        | 76                           | 118.4 (61.6–227.6)                     | 15.2 (2.7–84.9)                        |
| Bakir (2008) <sup>12</sup>           | 7.5                                     | Close Contacts Only (Age<18)   | TSPOT+, TST<10mm: 26                                   | 15.6                                  | 1 (3.8%)                         | 33.8                         | 29.6 (4.2–210)                         | Not estimated                          |
| Baliashvili (2018) <sup>13</sup>     | NR                                      | Close Contacts Only            | TST ≥10mm: 364                                         | 12                                    | 4 (1.1%)                         | 364                          | 11 (4.1–29.3)                          | 0.9 (0.3–2.7)                          |
| Benito (2002) <sup>14</sup>          | 50                                      | Transplant                     | TST ≥5mm: 73                                           | 49                                    | 0 (0%)                           | 298.1                        | 0                                      | 5 events among negative                |
| Bergot (2012) <sup>15</sup>          | 47.5                                    | All Contacts                   | QFT-GIT+: 51                                           | 34                                    | 1 (2%)                           | 144.5                        | 6.9 (1–49.1)                           | 10.3 (1.1–99.1)                        |
|                                      |                                         | All Contacts                   | TST ≥10mm, QFT-GIT-: 194                               | 34                                    | 1 (0.5%)                         | 549.7                        | 1.8 (0.3–12.9)                         | Not estimated                          |
| Bourgarit (2015) <sup>16</sup>       | 38.9                                    | HIV                            | QFT-GIT+: 23                                           | 52.3                                  | 0 (0%)                           | 100.2                        | 0                                      | Not estimated                          |
|                                      |                                         | HIV                            | TSPOT: 14                                              | 52.3                                  | 0 (0%)                           | 61                           | 0                                      | Not estimated                          |
|                                      |                                         | HIV                            | TST ≥5mm: 47                                           | 52.3                                  | 0 (0%)                           | 204.8                        | 0                                      | Not estimated                          |
| Bradshaw (2011) <sup>17</sup>        | 70.5                                    | All Contacts                   | QFT-GIT: 30                                            | 36                                    | 0 (0%)                           | 90                           | 0                                      | Not estimated                          |
| Cailleaux-Cezar (2009) <sup>18</sup> | 35                                      | All Contacts                   | TST ≥5mm: 349                                          | 24                                    | 19 (5.4%)                        | 698                          | 27.2 (17.4–42.7)                       | 5.1 (1.6–15.8)                         |
|                                      |                                         | All Contacts                   | TST ≥10mm: 269                                         | 24                                    | 15 (5.6%)                        | 538                          | 27.9 (16.8–46.2)                       | 3.1 (1.3–7.3)                          |
| Chakhaia (2014) <sup>19</sup>        | NR                                      | Close Contacts Only            | TST ≥5mm: 171                                          | 21                                    | 7 (4.1%)                         | 299.25                       | 23.4 (11.2–49.1)                       | 1.5 (0.5–4.6)                          |
|                                      |                                         | Close Contacts Only (Age<18)   | TST ≥5mm: 84                                           | 21                                    | 1 (1.2%)                         | 147                          | 6.8 (1–48.3)                           | Not estimated                          |
| Chang (2011) <sup>20</sup>           | NR                                      | Immune Suppressing Medications | TST ≥10mm, QFT-GIT-: 16                                | 24.5                                  | 0 (0%)                           | 32.7                         | 0                                      | Not estimated                          |
| Chan-Yeung (2007) <sup>21</sup>      | 82.4                                    | Elderly (Age≥65)               | TST ≥5mm: 1684                                         | 32.7                                  | 11 (0.9%)                        | 4583.3                       | 2.4 (1.3–4.3)                          | 1 (0.4–2.5)                            |
|                                      |                                         | Elderly (Age≥65)               | TST ≥10mm: 1276                                        | 32.4                                  | 11 (1.1%)                        | 3437.5                       | 3.2 (1.8–5.8)                          | 1.9 (0.8–4.6)                          |
|                                      |                                         | Elderly (Age≥65)               | TST ≥15mm: 853                                         | 31.7                                  | 9 (1.4%)                         | 2250                         | 4 (2.1–7.7)                            | 2.1 (0.9–5)                            |
|                                      |                                         | BMI <18.5 kg/m <sup>2</sup>    | TST ≥5mm: 491                                          | 28.5                                  | 7 (1.4%)                         | 1166.1                       | 6 (2.9–12.6)                           | 1.4 (0.5–4.2)                          |
|                                      |                                         | BMI <18.5 kg/m <sup>2</sup>    | TST ≥10mm: 358                                         | 28.6                                  | 7 (2%)                           | 853.2                        | 8.2 (3.9–17.2)                         | 2.5 (0.8–7.4)                          |
| Chee (2004) <sup>22</sup>            | NR                                      | Close Contacts Only            | TST ≥15mm: 199                                         | 28.2                                  | 5 (2.5%)                         | 467.7                        | 10.7 (4.4–25.7)                        | 3 (1–9.1)                              |
|                                      |                                         | Close Contacts Only            | TST ≥10mm: 1204                                        | 48                                    | 4 (0.3%)                         | 4816                         | 0.8 (0.3–2.2)                          | 5.3 (0.8–33.8)                         |

**Table S9. Study Characteristics and Outcomes Among Test-Positive Persons**

| Author (Year)                       | Mean or Median Age (Years)† | Population Evaluated*          | Positive Test Definition and Untreated Population Size | Mean or Median Individual FU (Months) | TB Events (Cumulative Incidence) | Total FU Time (Person Years) | TB Rate per 1000 Person Years (95% CI) | IRR Compared to Test Negative (95% CI) |
|-------------------------------------|-----------------------------|--------------------------------|--------------------------------------------------------|---------------------------------------|----------------------------------|------------------------------|----------------------------------------|----------------------------------------|
| Chigbu (2010) <sup>23</sup>         | 33.8                        | HIV                            | TST ≥5mm: 25                                           | 12                                    | 6 (24%)                          | 25                           | 240 (107.8 to 534.2)                   | 0 events among negative                |
|                                     |                             | Prisoners                      | TST ≥10mm: 58                                          | 12                                    | 8 (13.8%)                        | 58                           | 137.9 (69 to 275.8)                    | 0 events among negative                |
| Christopoulos (2009) <sup>24</sup>  | 52.7                        | Dialysis                       | TST ≥5mm: 89                                           | 36                                    | 10 (11.2%)                       | 267                          | 37.5 (20.2 to 69.6)                    | 1.5 (0.7 to 3.3)                       |
|                                     |                             | Dialysis                       | TST ≥10mm: 62                                          | 36                                    | 8 (12.9%)                        | 186                          | 43 (21.5 to 86)                        | 1.7 (0.8 to 4)                         |
| Chung (2010) <sup>25</sup>          | 54.2                        | Dialysis                       | QFT-GIT+: 43                                           | 12                                    | 0 (0%)                           | 43                           | 0                                      | Not estimated                          |
|                                     |                             | Dialysis                       | TSPOT+: 57                                             | 12                                    | 0 (0%)                           | 57                           | 0                                      | Not estimated                          |
|                                     |                             | Dialysis                       | TST ≥10mm: 26                                          | 12                                    | 0 (0%)                           | 26                           | 0                                      | Not estimated                          |
| Daley (1998) <sup>26</sup>          | NR                          | HIV                            | TST ≥5mm: 28                                           | 17.1                                  | 2 (7.1%)                         | 40                           | 50 (12.5 to 199.9)                     | 11.7 (2 to 67.4)                       |
|                                     |                             | IDU                            | TST ≥10mm: 125                                         | 24.9                                  | 1 (0.8%)                         | 259                          | 3.9 (0.5 to 27.4)                      | 3.7 (0.4 to 35.6)                      |
| Denholm (2012) <sup>27</sup>        | 27                          | All Contacts                   | TST ≥10mm: 38                                          | 54.5                                  | 2 (5.2%)                         | 172.4                        | 11.6 (2.9 to 46.4)                     | 0 events among negative                |
| Diel (2011) <sup>28</sup>           | NR                          | Close Contacts Only            | QFT-GIT+: 147                                          | 43                                    | 19 (3.2%)                        | 526.8                        | 36.1 (23 to 56.5)                      | 0 events among negative                |
|                                     |                             | Close Contacts Only            | TST ≥5mm: 555                                          | 43                                    | 17 (1.3%)                        | 1988.8                       | 8.5 (5.3 to 13.8)                      | 3.5 (0.9 to 13.1)                      |
|                                     |                             | Close Contacts Only            | TST ≥10mm: 207                                         | 43                                    | 10 (3.1%)                        | 741.8                        | 13.5 (7.3 to 25.1)                     | 1.9 (0.9 to 4)                         |
|                                     |                             | Close Contacts Only            | TST ≥15mm: 63                                          | 43                                    | 2 (4.8%)                         | 225.8                        | 8.9 (2.2 to 35.4)                      | 1.2 (0.3 to 4.3)                       |
| Dobler (2013) <sup>29</sup>         | NR                          | All Contacts                   | TST ≥10mm: 3942                                        | 52.9                                  | 38 (1%)                          | 17367                        | 2.2 (1.6 to 3)                         | 17.5 (6.6 to 46.5)                     |
| Dogan (2009) <sup>30</sup>          | 52                          | Dialysis                       | TST ≥10mm: 14                                          | 12                                    | 4 (28.6%)                        | 14                           | 285.7 (107.2 to 761.3)                 | 10.1 (2.5 to 40.8)                     |
| Edathodu (2017) <sup>31</sup>       | NR                          | Transplant                     | QFT-GIT: 69                                            | 25                                    | 0 (0%)                           | 143.8                        | 0                                      | Not estimated                          |
| Elliot (2018) <sup>32</sup>         | NR                          | Recent Immigrants (Age<18)     | TST ≥10mm: 44                                          | 46.8                                  | 0 (0%)                           | 171.6                        | 0                                      | Not estimated                          |
| Elzi (2007) <sup>33</sup>           | 36                          | HIV                            | TST ≥5mm: 246                                          | 49                                    | 16 (6.5%)                        | 1005                         | 15.9 (9.8 to 26)                       | 29 (13.4 to 62.8)                      |
| Espinal (2000) <sup>34</sup>        | NR                          | Close Contacts Only            | TST ≥10mm: 522                                         | 14                                    | 37 (7.1%)                        | 609                          | 60.8 (44 to 83.9)                      | 2.1 (1 to 4.3)                         |
| Fang (2002) <sup>35</sup>           | 54.7                        | Dialysis                       | TST ≥10mm: 53                                          | 12                                    | 7 (13.2%)                        | 53                           | 132.1 (63 to 277)                      | 2.7 (0.9 to 7.7)                       |
| Fournier (2015) <sup>36</sup>       | 31                          | All Contacts                   | QFT-GIT+: 26                                           | 15                                    | 0 (0%)                           | 32.5                         | 0                                      | Not estimated                          |
| Franken (2008) <sup>37</sup>        | 47.2                        | All Contacts                   | TST ≥15mm: 71                                          | 24                                    | 0 (0%)                           | 142                          | 0                                      | Not estimated                          |
|                                     |                             | All Contacts                   | TST ≥15mm, QFT-GIT-: 28                                | 24                                    | 0 (0%)                           | 56                           | 0                                      | Not estimated                          |
|                                     |                             | All Contacts                   | TST ≥15mm, TSPOT-: 24                                  | 24                                    | 0 (0%)                           | 48                           | 0                                      | Not estimated                          |
|                                     |                             | All Contacts                   | TST ≥15mm, QFT-GIT+: 17                                | 24                                    | 0 (0%)                           | 34                           | 0                                      | Not estimated                          |
|                                     |                             | All Contacts                   | TST ≥15mm, TSPOT+: 21                                  | 24                                    | 0 (0%)                           | 42                           | 0                                      | Not estimated                          |
| Gao (2017) <sup>38</sup>            | NR                          | Diabetes                       | QFT-GIT+: 272                                          | 23.2                                  | 4 (1.5%)                         | 525.9                        | 7.6 (2.9 to 20.3)                      | Not estimated                          |
|                                     |                             | Elderly (Age≥65)               | QFT-GIT+ 1840                                          | 23.2                                  | 41 (2.2%)                        | 3557.3                       | 11.5 (8.5 to 15.7)                     | Not estimated                          |
|                                     |                             | BMI <18.5 kg/m <sup>2</sup>    | QFT-GIT+: 299                                          | 23.2                                  | 9 (3%)                           | 578.1                        | 15.6 (8.1 to 29.9)                     | Not estimated                          |
|                                     |                             | Smokers                        | QFT-GIT+: 1547                                         | 23.2                                  | 28 (1.8%)                        | 2990.9                       | 9.4 (6.5 to 13.6)                      | Not estimated                          |
| Garie (2011) <sup>39</sup>          | 9.9                         | Close Contacts Only (Age<18)   | TST ≥5mm: 94                                           | 24                                    | 10 (10.6%)                       | 188                          | 53.2 (28.6 to 98.9)                    | 0 events among negative                |
|                                     |                             | Close Contacts Only (Age<18)   | TST ≥10mm: 68                                          | 24                                    | 9 (13.2%)                        | 136                          | 66.2 (34.4 to 127.2)                   | 3.2 (0.6 to 17.7)                      |
| Girardi (1997) <sup>40</sup>        | 27                          | HIV                            | TST ≥5mm: 197                                          | 16.9                                  | 15 (7.6%)                        | 277.3                        | 54.1 (32.6 to 89.7)                    | 11.8 (4.7 to 29.4)                     |
|                                     |                             | HIV                            | TST ≥10mm: 69                                          | 16.9                                  | 10 (14.5%)                       | 97.5                         | 102.6 (55.2 to 190.7)                  | 14.5 (6.3 to 33.5)                     |
| Golub (2015) <sup>41</sup>          | NR                          | HIV                            | TST ≥5mm: 353                                          | 44.8                                  | 86 (24.4%)                       | 1319                         | 65.2 (52.8 to 80.5)                    | Not estimated                          |
| Gómez-Reino (2007) <sup>42</sup>    | NR                          | Immune Suppressing Medications | TST ≥5mm: 56                                           | 20                                    | 1 (1.8%)                         | 93.5                         | 10.7 (1.5 to 75.9)                     | 7.2 (1.3 to 39.2)                      |
| Grinsdale (2016) <sup>43</sup>      | 8.7                         | Children (Age<18)              | QFT-G+: 11                                             | 72                                    | 0 (0%)                           | 66                           | 0                                      | Not estimated                          |
|                                     |                             | Children (Age<18)              | TST ≥10mm, QFT-G-: 146                                 | 67.2                                  | 0 (0%)                           | 817.6                        | 0                                      | Not estimated                          |
|                                     |                             | Young Children (Age<5)         | TST ≥10mm, QFT-G-: 54                                  | 68.4                                  | 0 (0%)                           | 307.8                        | 0                                      | Not estimated                          |
| Guirao-Arrabal (2016) <sup>44</sup> | 49                          | Transplant                     | TST ≥5mm: 40                                           | 18.3                                  | 0 (0%)                           | 60                           | 0                                      | 5 events among negative                |
| Haldar (2013) <sup>45</sup>         | NR                          | Close Contacts Only            | QFT-GIT+: 112                                          | 23.6                                  | 14 (12.5%)                       | 220.3                        | 63.5 (37.6 to 107.3)                   | 12 (4.7 to 30.2)                       |
| Hand (2018) <sup>46</sup>           | 59                          | Transplant                     | QFT-G+: 17                                             | 30                                    | 0 (0%)                           | 42.5                         | 0                                      | 3 events among negative                |
| Harstad (2010) <sup>47</sup>        | NR                          | Recent Immigrants              | QFT-GIT+: 236                                          | 27.5                                  | 6 (2.5%)                         | 540.8                        | 11.1 (5 to 24.7)                       | 0 events among negative                |
|                                     |                             | Recent Immigrants              | TST ≥5mm: 413                                          | 27.5                                  | 6 (1.4%)                         | 948.7                        | 6.3 (2.8 to 14.1)                      | 0 events among negative                |
|                                     |                             | Recent Immigrants              | TST ≥15mm: 121                                         | 27.5                                  | 3 (2.5%)                         | 277.3                        | 10.8 (3.5 to 33.5)                     | 5.7 (1.3 to 25.2)                      |
| Hemmati (2011) <sup>48</sup>        | NR                          | Children (Age<18)              | TST ≥10mm: 830                                         | 36                                    | 0 (0%)                           | 2490                         | 0                                      | Not estimated                          |
|                                     |                             | Children (Age<18)              | TST ≥15mm: 529                                         | 36                                    | 0 (0%)                           | 1587                         | 0                                      | Not estimated                          |

**Table S9. Study Characteristics and Outcomes Among Test-Positive Persons**

| Author (Year)                   | Mean or Median Age (Years)† | Population Evaluated*          | Positive Test Definition and Untreated Population Size | Mean or Median Individual FU (Months) | TB Events (Cumulative Incidence) | Total FU Time (Person Years) | TB Rate per 1000 Person Years (95% CI) | IRR Compared to Test Negative (95% CI) |
|---------------------------------|-----------------------------|--------------------------------|--------------------------------------------------------|---------------------------------------|----------------------------------|------------------------------|----------------------------------------|----------------------------------------|
| Higuchi (2009) <sup>49</sup>    | NR                          | Casual Contacts (Age<18)       | TST ≥5mm: 177                                          | 12                                    | 0 (0%)                           | 177                          | 0                                      | Not estimated                          |
|                                 |                             | Casual Contacts (Age<18)       | TST ≥10mm: 75                                          | 12                                    | 0 (0%)                           | 75                           | 0                                      | Not estimated                          |
|                                 |                             | Close Contacts Only (Age<18)   | TST ≥5mm: 17                                           | 12                                    | 0 (0%)                           | 17                           | 0                                      | Not estimated                          |
|                                 |                             | Close Contacts Only (Age<18)   | TST ≥10mm: 11                                          | 12                                    | 0 (0%)                           | 11                           | 0                                      | Not estimated                          |
| Hill (2007) <sup>50</sup>       | NR                          | All Contacts                   | TST ≥10mm: 156                                         | 15.6                                  | 4 (2.6%)                         | 202.8                        | 19.7 (7.4 to 52.6)                     | 2.4 (0.6 to 9.8)                       |
| Huang (2018) <sup>51</sup>      | NR                          | Immune Suppressing Medications | QFT-GIT+: 24                                           | 46.7                                  | 4 (16.7%)                        | 93.3                         | 42.9 (16.1 to 114.2)                   | 36.1 (5.7 to 229.1)                    |
|                                 |                             | Close Contacts Only (Age<18)   | TST ≥10mm: 70                                          | 21.2                                  | 0 (0%)                           | 100.89                       | 0                                      | Not estimated                          |
| Huerga (2019) <sup>52</sup>     | 6                           | Close Contacts Only (Age<18)   | TST ≥10mm: 70                                          | 21.2                                  | 0 (0%)                           | 123.9                        | 0                                      | Not estimated                          |
|                                 |                             | Close Contacts Only (Age<5)    | QFT-GIT+: 16                                           | 21.2                                  | 0 (0%)                           | 28.32                        | 0                                      | Not estimated                          |
|                                 |                             | Close Contacts Only (Age<5)    | TST ≥10mm: 23                                          | 21.2                                  | 0 (0%)                           | 40.71                        | 0                                      | Not estimated                          |
| Jambaldorj (2017) <sup>53</sup> | 44.5                        | Transplant                     | QFT-GIT+: 95                                           | 35.1                                  | 1 (1.1%)                         | 277.6                        | 3.6 (0.5 to 25.6)                      | 2.1 (0.3 to 15.7)                      |
| Jeyakumar (1999) <sup>54</sup>  | NR                          | Occupational Risk Factor       | TST ≥5mm: 310                                          | 24                                    | 3 (1%)                           | 620                          | 4.8 (1.6 to 15)                        | 0.4 (0.1 to 2.8)                       |
|                                 |                             | Occupational Risk Factor       | TST ≥10mm: 236                                         | 24                                    | 3 (1.3%)                         | 472                          | 6.4 (2 to 19.7)                        | 1.3 (0.2 to 8.5)                       |
|                                 |                             | Occupational Risk Factor       | TST ≥15mm: 104                                         | 24                                    | 3 (2.9%)                         | 208                          | 14.4 (4.7 to 44.7)                     | 5.8 (0.9 to 39.3)                      |
| Jo (2013) <sup>55</sup>         | 38.6                        | Immune Suppressing Medications | TSPOT+: 31                                             | 35.2                                  | 0 (0%)                           | 90.9                         | 0                                      | 1 event among negative                 |
|                                 |                             | Immune Suppressing Medications | TST ≥10mm: 16                                          | 35.2                                  | 0 (0%)                           | 46.9                         | 0                                      | 1 event among negative                 |
| Joshi (2011) <sup>56</sup>      | 22                          | Occupational Risk Factor       | QFT-GIT+: 265                                          | 71                                    | 6 (2.2%)                         | 1568.8                       | 3.8 (1.7 to 8.5)                       | 1.1 (0.4 to 3.2)                       |
|                                 |                             | Occupational Risk Factor       | TST ≥10mm: 269                                         | 71                                    | 6 (2.2%)                         | 1592.5                       | 3.8 (1.7 to 8.4)                       | 1.1 (0.4 to 3.2)                       |
| Jung (2012) <sup>57</sup>       | 42                          | Transplant                     | TST ≥5mm: 228                                          | 52.2                                  | 8 (3.5%)                         | 991.8                        | 8.1 (4 to 16.1)                        | 3.4 (1.2 to 9.9)                       |
|                                 |                             | Close Contacts Only            | TST ≥5mm: 339                                          | 21.96                                 | 9 (2.65%)                        | 620.4                        | 14.5 (7.5 to 27.9)                     | Not estimated                          |
| Kik (2010) <sup>58</sup>        | NR                          | Close Contacts Only            | TST ≥10mm: 288                                         | 21.96                                 | 9 (3.13%)                        | 527                          | 17.1 (8.9 to 32.8)                     | Not estimated                          |
|                                 |                             | Close Contacts Only            | TST ≥15mm: 184                                         | 21.96                                 | 7 (3.8%)                         | 336.7                        | 20.8 (9.9 to 43.6)                     | Not estimated                          |
|                                 |                             | Close Contacts Only            | TST ≥5mm, QFT-GIT-: 149                                | 21.96                                 | 3 (2.01%)                        | 272.7                        | 11 (3.5 to 34.1)                       | Not estimated                          |
|                                 |                             | Close Contacts Only            | TST ≥5mm, TSPOT-: 118                                  | 21.96                                 | 2 (1.69%)                        | 215.9                        | 9.3 (2.3 to 37)                        | Not estimated                          |
|                                 |                             | Close Contacts Only            | TST ≥5mm, QFT-GIT+: 178                                | 21.96                                 | 5 (2.81%)                        | 325.7                        | 15.4 (6.4 to 36.9)                     | Not estimated                          |
|                                 |                             | Close Contacts Only            | TST ≥5mm, TSPOT+: 181                                  | 21.96                                 | 6 (3.31%)                        | 331.2                        | 18.1 (8.1 to 40.3)                     | Not estimated                          |
|                                 |                             | Close Contacts Only            | TST ≥5mm: 33                                           | 37.1                                  | 1 (3%)                           | 101.97                       | 9.8 (1.4 to 69.6)                      | 15.7 (1.6 to 150.5)                    |
| Kim (2017) <sup>60</sup>        | 32.2                        | Occupational Risk Factor       | TST ≥10mm: 29                                          | 13.2                                  | 1 (3.4%)                         | 31.88                        | 31.4 (4.4 to 222.7)                    | 0 events among negative                |
| Kim (2015) <sup>61</sup>        | 48.2                        | Transplant                     | TSPOT+: 132                                            | 22.3                                  | 3 (2.3%)                         | 245.15                       | 12.2 (3.9 to 37.9)                     | 3.4 (0.8 to 14.8)                      |
| Kim (2011) <sup>62</sup>        | 46                          | Transplant                     | TSPOT+, TST <10mm: 71                                  | 20.6                                  | 4 (5.6%)                         | 122.1                        | 32.8 (12.3 to 87.3)                    | Not estimated                          |
| Kim (2015) <sup>63</sup>        | 17                          | All Contacts                   | TST ≥10mm, QFT-GIT-: 689                               | 46.8                                  | 11 (1.6%)                        | 2742                         | 4 (2.2 to 7.2)                         | Not estimated                          |
|                                 |                             | All Contacts                   | TST ≥10mm, QFT-GIT+: 21                                | 46.8                                  | 5 (23.9%)                        | 75                           | 66.7 (27.7 to 160.2)                   | Not estimated                          |
| Kruczak (2014) <sup>64</sup>    | 49                          | Casual Contacts                | QFT-GIT+: 39                                           | 47.3                                  | 2 (5.1%)                         | 153.8                        | 13 (3.3 to 52)                         | 0 events among negative                |
|                                 |                             | Close Contacts Only            | QFT-GIT+: 34                                           | 58.8                                  | 3 (8.8%)                         | 166.7                        | 18 (5.8 to 55.8)                       | 4.2 (0.8 to 21.3)                      |
|                                 |                             | Close Contacts Only            | TST ≥10mm: 62                                          | 59.6                                  | 4 (6.5%)                         | 307.7                        | 13 (4.9 to 34.6)                       | 3.2 (0.5 to 20.6)                      |
|                                 |                             | Close Contacts Only            | TST ≥10mm, QFT-GIT-: 39                                | 61.5                                  | 2 (5.1%)                         | 200                          | 10 (2.5 to 40)                         | Not estimated                          |
|                                 |                             | Close Contacts Only            | TST ≥10mm, QFT-GIT+: 22                                | 60.6                                  | 2 (9.1%)                         | 111.1                        | 18 (4.5 to 72)                         | Not estimated                          |
|                                 |                             | Homeless                       | QFT-GIT+: 27                                           | 44.4                                  | 3 (11.1%)                        | 100                          | 30 (9.7 to 93)                         | 2 (0.4 to 10.1)                        |
|                                 |                             | Homeless                       | TST ≥10mm: 25                                          | 48                                    | 3 (12%)                          | 100                          | 30 (9.7 to 93)                         | 1.8 (0.3 to 12.2)                      |
|                                 |                             | Homeless                       | TST ≥10mm, QFT-GIT+: 14                                | 47.7                                  | 3 (21.4%)                        | 55.6                         | 54 (17.4 to 167.3)                     | Not estimated                          |
|                                 |                             | Long Term Care                 | QFT-GIT+: 35                                           | 30                                    | 0 (0%)                           | 87.5                         | 0                                      | Not estimated                          |
| Long Term Care                  | TST ≥10mm: 58               | 30                             | 0 (0%)                                                 | 145                                   | 0                                | Not estimated                |                                        |                                        |
| Laffitte (2009) <sup>65</sup>   | 48                          | Immune Suppressing Medications | TST ≥5mm, TSPOT-: 10                                   | 14.8                                  | 0 (0%)                           | 12.3                         | 0                                      | Not estimated                          |
| Lange (2012) <sup>66</sup>      | 54.5                        | Transplant                     | QFT-GIT+: 25                                           | 28                                    | 0 (0%)                           | 58.3                         | 0                                      | Not estimated                          |
| Lee (2012) <sup>67</sup>        | 41                          | Close Contacts Only            | TSPOT+, TST <10mm: 13                                  | 24.9                                  | 0 (0%)                           | 27                           | 0                                      | Not estimated                          |
|                                 |                             | Close Contacts Only            | TST ≥10mm, TSPOT-: 16                                  | 27.6                                  | 0 (0%)                           | 37                           | 0                                      | Not estimated                          |
|                                 |                             | Close Contacts Only            | TST ≥10mm, TSPOT+: 10                                  | 21                                    | 0 (0%)                           | 17.5                         | 0                                      | Not estimated                          |
| Lee (2014) <sup>68</sup>        | 42.3                        | Transplant                     | QFT-GIT+: 45                                           | 21.6                                  | 3 (6.7%)                         | 81.1                         | 37 (11.9 to 114.7)                     | 4.3 (0.9 to 22)                        |
|                                 |                             | Transplant                     | TST ≥5mm: 31                                           | 26.4                                  | 0 (0%)                           | 68.5                         | 0                                      | 5 events among negative                |
| Lee (2015) <sup>69</sup>        | 33                          | Immune Suppressing Medications | TST ≥10mm, QFT-GIT-: 60                                | 41.7                                  | 2 (3.3%)                         | 208.5                        | 9.6 (2.4 to 38.4)                      | Not estimated                          |
| Lee (2019) <sup>70</sup>        | NR                          | HIV                            | TSPOT+: 37                                             | 51.2                                  | 4 (10.8%)                        | 158                          | 25.3 (9.5 to 67.5)                     | 28.7 (4.5 to 182)                      |

**Table S9. Study Characteristics and Outcomes Among Test-Positive Persons**

| Author (Year)                      | Mean or Median Age (Years)† | Population Evaluated*        | Positive Test Definition and Untreated Population Size | Mean or Median Individual FU (Months) | TB Events (Cumulative Incidence) | Total FU Time (Person Years) | TB Rate per 1000 Person Years (95% CI) | IRR Compared to Test Negative (95% CI) |
|------------------------------------|-----------------------------|------------------------------|--------------------------------------------------------|---------------------------------------|----------------------------------|------------------------------|----------------------------------------|----------------------------------------|
| Lee (2015) <sup>71</sup>           | 36.8                        | HIV                          | QFT-GIT+: 90                                           | 59.7                                  | 6 (6.7%)                         | 447.8                        | 13.4 (6 to 29.8)                       | 4.5 (1.7 to 11.9)                      |
| Lee (2009) <sup>72</sup>           | 54.9                        | Dialysis                     | QFT-GIT+: 12                                           | 22                                    | 1 (8.3%)                         | 22.6                         | 44.2 (6.2 to 314.1)                    | 0 events among negative                |
|                                    |                             | Dialysis                     | TSPOT+: 15                                             | 22                                    | 0 (0%)                           | 28.2                         | 0                                      | 2 events among negative                |
|                                    |                             | Dialysis                     | TST ≥10mm: 20                                          | 22                                    | 1 (5%)                           | 37.6                         | 26.6 (3.7 to 188.8)                    | 0.6 (0.1 to 5.8)                       |
| Leow (2014) <sup>73</sup>          | NR                          | Diabetes                     | TSPOT+: 62                                             | 61.2                                  | 0 (0%)                           | 316.2                        | 0                                      | 1 event among negative                 |
|                                    |                             | Diabetes                     | TST ≥10mm: 63                                          | 61.2                                  | 0 (0%)                           | 321.3                        | 0                                      | 1 event among negative                 |
|                                    |                             | Diabetes                     | TST ≥10mm, TSPOT+: 29                                  | 61.2                                  | 0 (0%)                           | 147.9                        | 0                                      | Not estimated                          |
| Leung (2007) <sup>74</sup>         | 57.3                        | Silicosis                    | TST ≥10mm: 216                                         | 62.7                                  | 45 (20.8%)                       | 1128.6                       | 39.9 (29.8 to 53.4)                    | Not estimated                          |
| Leung (2012) <sup>75</sup>         | 8.4                         | Children (Age<18)            | TST ≥5mm: 4820                                         | 133.1                                 | 23 (0.5%)                        | 53443                        | 0.4 (0.3 to 0.6)                       | 3.3 (1.8 to 5.9)                       |
|                                    |                             | Children (Age<18)            | TST ≥10mm: 2419                                        | 133.1                                 | 18 (0.7%)                        | 26821                        | 0.7 (0.4 to 1.1)                       | 4.9 (2.7 to 8.9)                       |
|                                    |                             | Children (Age<18)            | TST ≥15mm: 421                                         | 132.2                                 | 13 (3.1%)                        | 4637                         | 2.8 (1.6 to 4.8)                       | 19.4 (10.3 to 36.7)                    |
| Leung (2015) <sup>76</sup>         | 38                          | Close Contacts Only          | TSPOT+: 237                                            | 55.3                                  | 8 (3.4%)                         | 1093                         | 7.3 (3.7 to 14.6)                      | 4.1 (1.4 to 12)                        |
|                                    |                             | Close Contacts Only          | TST ≥5mm: 496                                          | 56.2                                  | 11 (2.2%)                        | 2323                         | 4.7 (2.6 to 8.6)                       | 3.3 (0.8 to 13)                        |
|                                    |                             | Close Contacts Only          | TST ≥10mm: 330                                         | 56                                    | 10 (3%)                          | 1541                         | 6.5 (3.5 to 12.1)                      | 4.8 (1.4 to 16)                        |
| Leung (2010) <sup>77</sup>         | 60                          | Silicosis                    | TSPOT+: 151                                            | 27.4                                  | 12 (7.9%)                        | 345.4                        | 34.7 (19.7 to 61.2)                    | 5.9 (1.1 to 32.1)                      |
|                                    |                             | Silicosis                    | TST ≥5mm: 161                                          | 30.5                                  | 9 (5.6%)                         | 408.6                        | 22 (11.5 to 42.3)                      | 0.9 (0.3 to 2.9)                       |
|                                    |                             | Silicosis                    | TST ≥10mm: 136                                         | 29.7                                  | 9 (6.6%)                         | 336.8                        | 26.7 (13.9 to 51.4)                    | 1.6 (0.5 to 4.9)                       |
|                                    |                             | Silicosis                    | TST ≥15mm: 89                                          | 30.4                                  | 4 (4.5%)                         | 225.5                        | 17.7 (6.7 to 47.3)                     | 0.8 (0.2 to 2.4)                       |
| Lienhardt (2010) <sup>78</sup>     | 20                          | Close Contacts Only          | TST ≥5mm: 1910                                         | 25                                    | 44 (2.3%)                        | 3977                         | 11.1 (8.2 to 14.9)                     | 3 (1.1 to 7.8)                         |
|                                    |                             | Close Contacts Only          | TST ≥10mm: 1591                                        | 25.1                                  | 39 (2.5%)                        | 3332                         | 11.7 (8.6 to 16)                       | 2.3 (1.1 to 4.7)                       |
|                                    |                             | Close Contacts Only          | TST ≥15mm: 903                                         | 25.1                                  | 32 (3.5%)                        | 1889                         | 16.9 (12 to 24)                        | 3.4 (1.9 to 6.2)                       |
| Ling (2011) <sup>79</sup>          | NR                          | All Contacts (Age<18)        | TST ≥5mm: 1067                                         | 24                                    | 6 (0.6%)                         | 2134                         | 2.8 (1.3 to 6.3)                       | 3.3 (0.8 to 14.1)                      |
|                                    |                             | All Contacts (Age<18)        | TST ≥10mm: 628                                         | 24                                    | 6 (1%)                           | 1256                         | 4.8 (2.1 to 10.6)                      | 7.4 (1.7 to 31.7)                      |
|                                    |                             | All Contacts (Age<18)        | TST ≥15mm: 262                                         | 24                                    | 5 (1.9%)                         | 524                          | 9.5 (4 to 22.9)                        | 12.9 (3.4 to 49.2)                     |
| Luabeya (2015) <sup>80</sup>       | 0.35                        | Young Children (Age<5)       | QFT-GIT+: 206                                          | 28.9                                  | 28 (13.6%)                       | 496                          | 56.5 (39 to 81.8)                      | Not estimated                          |
| Marks (2000) <sup>81</sup>         | 27                          | Recent Immigrants            | TST ≥10mm: 8937                                        | 123.6                                 | 88 (0.1%)                        | 92051                        | 1 (0.8 to 1.2)                         | 2.8 (1.8 to 4.5)                       |
|                                    |                             | Recent Immigrants            | TST ≥15mm: 5196                                        | 123.6                                 | 68 (1.3%)                        | 53519                        | 1.3 (1 to 1.6)                         | 3 (2.1 to 4.4)                         |
|                                    |                             | Recent Immigrants (BCG)      | TST ≥10mm: 4970                                        | 123.6                                 | 45 (0.1%)                        | 51191                        | 0.9 (0.7 to 1.2)                       | 2.8 (1.4 to 5.4)                       |
|                                    |                             | Recent Immigrants (BCG)      | TST ≥15mm: 2954                                        | 123.6                                 | 32 (1.1%)                        | 30426                        | 1.1 (0.7 to 1.5)                       | 2.4 (1.4 to 4.1)                       |
| Martin (2001) <sup>82</sup>        | 29                          | Prisoners                    | TST ≥5mm: 486                                          | 40.8                                  | 17 (3.5%)                        | 1639                         | 10.4 (6.4 to 16.7)                     | 2.7 (1 to 7.1)                         |
| Martinez-Pino (2013) <sup>83</sup> | 37.7                        | HIV                          | TST ≥5mm: 183                                          | 19.7                                  | 18 (9.8%)                        | 300                          | 60 (37.8 to 95.2)                      | 5.8 (3.4 to 10.1)                      |
| Mazahir (2017) <sup>84</sup>       | 8                           | Close Contacts Only (Age<18) | TST ≥10mm: 19                                          | 12                                    | 1 (5.2%)                         | 19                           | 52.6 (7.4 to 373.6)                    | 0 events among negative                |
| Metin Timur (2014) <sup>85</sup>   | 7.9                         | Children (Age<18)            | TST ≥15mm, QFT-GIT-: 69                                | 18                                    | 0 (0%)                           | 103.5                        | 0                                      | Not estimated                          |
| Moon (2013) <sup>86</sup>          | 47                          | Transplant                   | QFT-GIT+: 40                                           | 12                                    | 1 (2.5%)                         | 40                           | 25 (3.5 to 177.5)                      | 4.3 (0.4 to 41.2)                      |
|                                    |                             | Transplant                   | TST ≥5mm: 33                                           | 12                                    | 0 (0%)                           | 33                           | 0                                      | 2 events among negative                |
|                                    |                             | Transplant                   | TST ≥10mm: 21                                          | 12                                    | 0 (0%)                           | 21                           | 0                                      | 2 events among negative                |
| Moran-Mendoza (2007) <sup>87</sup> | NR                          | All Contacts (Age<18)        | TST ≥5mm: 102                                          | 74.4                                  | 49 (48%)                         | 632.4                        | 77.5 (58.6 to 102.5)                   | 58.5 (33.9 to 100.9)                   |
|                                    |                             | All Contacts (Age<18)        | TST ≥10mm: 84                                          | 74.4                                  | 48 (57.1%)                       | 520.8                        | 92.2 (69.5 to 122.3)                   | 66.4 (38.9 to 113.5)                   |
|                                    |                             | All Contacts (Age<18)        | TST ≥15mm: 51                                          | 74.4                                  | 34 (66.7%)                       | 316.2                        | 107.5 (76.8 to 150.5)                  | 45 (27.9 to 72.6)                      |
|                                    |                             | All Contacts (Immune Meds)   | TST ≥5mm: 335                                          | 74.4                                  | 11 (3.3%)                        | 2077                         | 5.3 (2.9 to 9.6)                       | 5 (1.9 to 13.2)                        |
|                                    |                             | All Contacts (Immune Meds)   | TST ≥10mm: 283                                         | 74.4                                  | 10 (3.5%)                        | 1754.6                       | 5.7 (3.1 to 10.6)                      | 5 (1.9 to 12.7)                        |
|                                    |                             | All Contacts (Immune Meds)   | TST ≥15mm: 170                                         | 74.4                                  | 8 (4.7%)                         | 1054                         | 7.6 (3.8 to 15.2)                      | 5.9 (2.3 to 14.8)                      |
|                                    |                             | Casual Contacts Only         | TST ≥5mm: 2465                                         | 74.4                                  | 21 (0.9%)                        | 15283                        | 1.4 (0.9 to 2.1)                       | 9.9 (4.6 to 21.3)                      |
|                                    |                             | Casual Contacts Only         | TST ≥10mm: 1975                                        | 74.4                                  | 20 (1%)                          | 12245                        | 1.6 (1.1 to 2.5)                       | 11.2 (5.3 to 23.5)                     |
|                                    |                             | Casual Contacts Only         | TST ≥15mm: 1045                                        | 74.4                                  | 12 (1.1%)                        | 6479                         | 1.9 (1.1 to 3.3)                       | 7.9 (3.9 to 16.2)                      |
|                                    |                             | Close Contacts Only          | TST ≥5mm: 2589                                         | 74.4                                  | 110 (4.2%)                       | 16051.8                      | 6.9 (5.7 to 8.3)                       | 11.2 (7.8 to 16)                       |
|                                    |                             | Close Contacts Only          | TST ≥10mm: 2066                                        | 74.4                                  | 105 (5.1%)                       | 12809.2                      | 8.2 (6.8 to 9.9)                       | 12.5 (8.8 to 17.7)                     |
|                                    |                             | Close Contacts Only          | TST ≥15mm: 1127                                        | 74.4                                  | 79 (7%)                          | 6987.4                       | 11.3 (9.1 to 14.1)                     | 11.9 (8.7 to 16.4)                     |
|                                    |                             | Moss (2000) <sup>88</sup>    | 38                                                     | HIV                                   | TST ≥5mm: 36                     | 40.2                         | 3 (8.3%)                               | 120.6                                  |
| Homeless                           | TST ≥10mm: 632              |                              |                                                        | 43.6                                  | 8 (1.3%)                         | 2295.2                       | 3.5 (1.7 to 7)                         | 4.7 (1.3 to 16.2)                      |
| Moyo (2015) <sup>89</sup>          | NR                          | All Contacts                 | TST ≥5mm: 4212                                         | 57.6                                  | 141 (3.3%)                       | 20217.6                      | 7 (5.9 to 8.2)                         | 25.2 (13.8 to 46)                      |

**Table S9. Study Characteristics and Outcomes Among Test-Positive Persons**

| Author (Year)                         | Mean or Median Age (Years)† | Population Evaluated*          | Positive Test Definition and Untreated Population Size | Mean or Median Individual FU (Months) | TB Events (Cumulative Incidence) | Total FU Time (Person Years) | TB Rate per 1000 Person Years (95% CI) | IRR Compared to Test Negative (95% CI) |
|---------------------------------------|-----------------------------|--------------------------------|--------------------------------------------------------|---------------------------------------|----------------------------------|------------------------------|----------------------------------------|----------------------------------------|
| Noorbakhsh (2011) <sup>90</sup>       | 7.6                         | All Contacts (Age<18)          | QFT-G+: 18                                             | 12                                    | 10 (55.6%)                       | 18                           | 555.6 (298.9 to 1032.5)                | 0 events among negative                |
| Ozgen (2018) <sup>91</sup>            | 47.3                        | Transplant                     | TST ≥15mm: 28                                          | 60                                    | 2 (7.1%)                         | 140                          | 14.3 (3.6 to 57.1)                     | 4.8 (0.6 to 36)                        |
| Pai (2009) <sup>92</sup>              | 25                          | Close Contacts Only            | QFT-GIT+: 135                                          | 12                                    | 0 (0%)                           | 135                          | 0                                      | Not estimated                          |
|                                       |                             | Close Contacts Only            | TST ≥10mm: 115                                         | 12                                    | 0 (0%)                           | 115                          | 0                                      | Not estimated                          |
| Pullar (2014) <sup>93</sup>           | 37                          | HIV                            | QFT-GIT+: 16                                           | 24                                    | 0 (0%)                           | 32                           | 0                                      | Not estimated                          |
| Rakotosamimanana (2015) <sup>94</sup> | NR                          | Close Contacts Only            | TST ≥5mm: 222                                          | 18                                    | 10 (4.5%)                        | 333                          | 30 (16.2 to 55.8)                      | 1.2 (0.3 to 4.9)                       |
| Ringshausen (2013) <sup>95</sup>      | 75                          | Occupational Risk Factor       | QFT-GIT+: 55                                           | 29.2                                  | 0 (0%)                           | 133.8                        | 0                                      | Not estimated                          |
|                                       |                             | Occupational Risk Factor       | TSPOT+: 72                                             | 29.2                                  | 0 (0%)                           | 175.2                        | 0                                      | Not estimated                          |
| Ringshausen (2009) <sup>96</sup>      | 38                          | Occupational Risk Factor       | QFT-GIT+: 12                                           | 24.5                                  | 0 (0%)                           | 24.4                         | 0                                      | Not estimated                          |
|                                       |                             | Occupational Risk Factor       | TST ≥5mm: 40                                           | 24.5                                  | 0 (0%)                           | 81.2                         | 0                                      | Not estimated                          |
|                                       |                             | Occupational Risk Factor       | TST ≥10mm: 28                                          | 24.5                                  | 0 (0%)                           | 56.8                         | 0                                      | Not estimated                          |
| Ringshausen (2010) <sup>97</sup>      | 38                          | Occupational Risk Factor       | QFT-GIT+: 18                                           | 32                                    | 0 (0%)                           | 48                           | 0                                      | Not estimated                          |
|                                       |                             | Occupational Risk Factor       | TST ≥5mm: 51                                           | 32                                    | 0 (0%)                           | 136                          | 0                                      | Not estimated                          |
|                                       |                             | Occupational Risk Factor       | TST ≥10mm: 44                                          | 32                                    | 0 (0%)                           | 117.3                        | 0                                      | Not estimated                          |
| Rueda (2014) <sup>98</sup>            | 32                          | Prisoners                      | TST ≥10mm: 643                                         | 12                                    | 4 (0.6%)                         | 643                          | 6.2 (2.3 to 16.6)                      | 0 events among negative                |
| Sanchez-Moya (2012) <sup>99</sup>     | 44                          | Immune Suppressing Medications | TST ≥5mm: 23                                           | 41.5                                  | 1 (4.3%)                         | 79.5                         | 12.6 (1.8 to 89.3)                     | 6.7 (0.9 to 50.4)                      |
| Saunders (2017) <sup>100</sup>        | 30                          | Close Contacts Only            | TST ≥5mm: 1004                                         | 128.4                                 | 118 (11.8%)                      | 10742.8                      | 11 (9.2 to 13.2)                       | 1.9 (1.2 to 2.8)                       |
| Schablon (2014) <sup>101</sup>        | 38.9                        | Occupational Risk Factor       | QFT-GIT+: 74                                           | 12.8                                  | 0 (0%)                           | 79                           | 0                                      | Not estimated                          |
| Sester (2014) <sup>102</sup>          | 62.5                        | Dialysis                       | QFT-GIT+: 62                                           | 21.6                                  | 0 (0%)                           | 111.6                        | 0                                      | Not estimated                          |
|                                       |                             | Dialysis                       | TSPOT+: 75                                             | 21.6                                  | 0 (0%)                           | 135                          | 0                                      | Not estimated                          |
|                                       |                             | Dialysis                       | TST ≥5mm: 62                                           | 21.6                                  | 0 (0%)                           | 111.6                        | 0                                      | Not estimated                          |
|                                       |                             | HIV                            | QFT-GIT+: 83                                           | 21.6                                  | 3 (3.6%)                         | 149.4                        | 20.1 (6.5 to 62.3)                     | 4.2 (1.1 to 16)                        |
|                                       | 40.8                        | HIV                            | TSPOT+: 101                                            | 21.6                                  | 4 (4%)                           | 181.8                        | 22 (8.3 to 58.6)                       | 4.3 (1.2 to 15)                        |
|                                       |                             | HIV                            | TST ≥5mm: 55                                           | 21.6                                  | 4 (7.3%)                         | 99                           | 40.4 (15.2 to 107.7)                   | 7.3 (2.2 to 24.3)                      |
|                                       | 55.7                        | Immune Suppressing Medications | QFT-GIT+: 41                                           | 21.6                                  | 0 (0%)                           | 73.8                         | 0                                      | Not estimated                          |
|                                       |                             | Immune Suppressing Medications | TSPOT+: 45                                             | 21.6                                  | 0 (0%)                           | 81                           | 0                                      | Not estimated                          |
|                                       |                             | Immune Suppressing Medications | TST ≥5mm: 61                                           | 21.6                                  | 0 (0%)                           | 109.8                        | 0                                      | Not estimated                          |
|                                       | 57                          | Transplant                     | QFT-GIT+: 25                                           | 21.6                                  | 0 (0%)                           | 45                           | 0                                      | Not estimated                          |
| Transplant                            |                             | TSPOT+: 33                     | 21.6                                                   | 0 (0%)                                | 59.4                             | 0                            | 1 event among negative                 |                                        |
| Sharma (2017) <sup>103</sup>          | 24.3                        | Transplant                     | TST ≥5mm: 13                                           | 21.6                                  | 0 (0%)                           | 23.4                         | 0                                      | 1 event among negative                 |
|                                       |                             | Close Contacts Only            | QFT-GIT+: 917                                          | 28.2                                  | 56 (6.1%)                        | 2151.5                       | 26 (20 to 33.8)                        | 1.9 (1.1 to 3.1)                       |
|                                       |                             | Close Contacts Only            | TST ≥10mm: 732                                         | 30.4                                  | 42 (5.7%)                        | 1851.6                       | 22.7 (16.8 to 30.7)                    | 1.1 (0.7 to 1.8)                       |
|                                       |                             | Close Contacts Only            | TST ≥10mm, QFT-GIT-: 187                               | 28                                    | 13 (7%)                          | 436.6                        | 29.8 (17.3 to 51.3)                    | Not estimated                          |
|                                       |                             | Close Contacts Only            | QFT-GIT+, TST <10mm: 377                               | 24.1                                  | 28 (7.4%)                        | 757                          | 37 (25.5 to 53.6)                      | Not estimated                          |
| Shu (2016) <sup>104</sup>             | 61.2                        | Close Contacts Only            | TST ≥10mm, QFT-GIT+: 540                               | 31.4                                  | 29 (5.4%)                        | 1415                         | 20.5 (14.2 to 29.5)                    | Not estimated                          |
|                                       |                             | Dialysis                       | QFT-GIT+: 193                                          | 36                                    | 3 (1.6%)                         | 579                          | 5.2 (1.7 to 16.1)                      | 5.4 (0.8 to 36.7)                      |
| Shu (2013) <sup>105</sup>             | 59.3                        | Dialysis                       | QFT-GIT+: 45                                           | 12                                    | 0 (0%)                           | 45                           | 0                                      | Not estimated                          |
| Silva (2014) <sup>106</sup>           | 52                          | Immune Suppressing Medications | TST ≥5mm: 10                                           | 24                                    | 3 (30%)                          | 20                           | 150 (48.4 to 465.1)                    | 0 events among negative                |
| Singh (2013) <sup>107</sup>           | 26.5                        | Close Contacts Only            | TST ≥10mm: 1135                                        | 21.4                                  | 19 (1.7%)                        | 2024.1                       | 9.4 (6 to 14.7)                        | 0.3 (0.1 to 0.6)                       |
| Snast (2018) <sup>108</sup>           | 52                          | Immune Suppressing Medications | TST ≥5mm: 39                                           | 51                                    | 0 (0%)                           | 165.8                        | 0                                      | Not estimated                          |
| Song (2014) <sup>109</sup>            | 15.1                        | Close Contacts Only (Age<18)   | QFT-GIT+: 102                                          | 24                                    | 6 (5.9%)                         | 204                          | 29.4 (13.2 to 65.5)                    | 13.5 (5.2 to 34.8)                     |
|                                       |                             | Close Contacts Only (Age<18)   | TST ≥10mm: 446                                         | 24                                    | 8 (1.8%)                         | 892                          | 9 (4.5 to 17.9)                        | 4.2 (1.7 to 10.3)                      |
|                                       |                             | Close Contacts Only (Age<18)   | TST ≥10mm, QFT-GIT-: 430                               | 24                                    | 3 (0.7%)                         | 860                          | 3.5 (1.1 to 10.8)                      | Not estimated                          |
|                                       |                             | Close Contacts Only (Age<18)   | QFT-GIT+, TST <10mm: 86                                | 24                                    | 1 (1.2%)                         | 172                          | 5.8 (0.8 to 41.3)                      | Not estimated                          |
|                                       |                             | Close Contacts Only (Age<18)   | TST ≥10mm, QFT-GIT+: 16                                | 24                                    | 5 (31.3%)                        | 32                           | 156.2 (65 to 375.4)                    | Not estimated                          |
| Song (2012) <sup>110</sup>            | 17.8                        | All Contacts (Age<18)          | TST ≥10mm: 99                                          | 24                                    | 6 (6.1%)                         | 198                          | 30.3 (13.6 to 67.5)                    | 9.7 (3.7 to 25.9)                      |
|                                       |                             | All Contacts (Age<18)          | TST ≥10mm, QFT-GIT-: 67                                | 24                                    | 0 (0%)                           | 134                          | 0                                      | Not estimated                          |
|                                       |                             | All Contacts (Age<18)          | TST ≥10mm, QFT-GIT+: 32                                | 24                                    | 6 (18.8%)                        | 64                           | 93.7 (42.1 to 208.7)                   | Not estimated                          |
| Sun (2015) <sup>111</sup>             | 15.1                        | HIV                            | TSPOT+: 64                                             | 31.2                                  | 1 (1.6%)                         | 167                          | 6 (0.8 to 42.5)                        | 0 events among negative                |

**Table S9. Study Characteristics and Outcomes Among Test-Positive Persons**

| Author (Year)                      | Mean or Median Age (Years)† | Population Evaluated*          | Positive Test Definition and Untreated Population Size | Mean or Median Individual FU (Months) | TB Events (Cumulative Incidence) | Total FU Time (Person Years) | TB Rate per 1000 Person Years (95% CI) | IRR Compared to Test Negative (95% CI) |
|------------------------------------|-----------------------------|--------------------------------|--------------------------------------------------------|---------------------------------------|----------------------------------|------------------------------|----------------------------------------|----------------------------------------|
| Torres Costa (2011) <sup>112</sup> | NR                          | Occupational Risk Factor       | QFT-GIT+: 941                                          | 19                                    | 4 (0.4%)                         | 1489.9                       | 2.7 (1 to 7.2)                         | 0 events among negative                |
|                                    |                             | Occupational Risk Factor       | TST ≥10mm: 2090                                        | 19                                    | 4 (0.2%)                         | 3309.2                       | 1.2 (0.5 to 3.2)                       | 0 events among negative                |
|                                    |                             | Occupational Risk Factor       | TST ≥10mm, QFT-GIT-: 1252                              | 19                                    | 0 (0%)                           | 1982.3                       | 0                                      | Not estimated                          |
|                                    |                             | Occupational Risk Factor       | QFT-GIT+, TST <10mm: 103                               | 19                                    | 0 (0%)                           | 163.1                        | 0                                      | Not estimated                          |
|                                    |                             | Occupational Risk Factor       | TST ≥10mm, QFT-GIT+: 838                               | 19                                    | 4 (0.5%)                         | 1326.8                       | 3 (1.1 to 8)                           | Not estimated                          |
| Truong (1997) <sup>113</sup>       | 45                          | Recent Immigrants              | TST ≥10mm: 50                                          | 19                                    | 4 (8%)                           | 79.2                         | 50.5 (19 to 134.6)                     | 0 events among negative                |
| Tsou (2015) <sup>114</sup>         | 30                          | Elderly                        | QFT-G+: 39                                             | 60                                    | 1 (2.6%)                         | 195                          | 5.1 (0.7 to 36.4)                      | 1.5 (0.2 to 11.6)                      |
|                                    |                             | Elderly                        | TST ≥10mm: 100                                         | 60                                    | 3 (3%)                           | 500                          | 6 (1.9 to 18.6)                        | 0 events among negative                |
| Ward (2017) <sup>3</sup>           | 79.9                        | Children (Age<18)              | TST ≥10mm: 139                                         | 114.9                                 | 8 (5.8%)                         | 1331                         | 6 (3 to 12)                            | Not estimated                          |
|                                    |                             | Recent Immigrants              | TST ≥10mm: 970                                         | 105.8                                 | 25 (2.6%)                        | 8549                         | 2.9 (2 to 4.3)                         | Not estimated                          |
|                                    |                             | Indigenous                     | TST ≥10mm: 4904                                        | 106.3                                 | 662 (13.5%)                      | 43425                        | 15.2 (14.1 to 16.5)                    | Not estimated                          |
| Xie (2011) <sup>115</sup>          | NR                          | Immune Suppressing Medications | TST ≥5mm: 10                                           | 12                                    | 1 (10%)                          | 10                           | 100.0 (14.1 to 709.9)                  | 2.3 (0.2 to 25.4)                      |
|                                    |                             | HIV                            | TSPOT+: 85                                             | 35.6                                  | 4 (4.7%)                         | 252.5                        | 15.8 (5.9 to 42.2)                     | 0 events among negative                |
| Yang (2013) <sup>116</sup>         | 34.8                        | HIV                            | TST ≥5mm: 140                                          | 35.6                                  | 4 (2.9%)                         | 415.8                        | 9.6 (3.6 to 25.6)                      | 0 events among negative                |
|                                    |                             | HIV                            | TST ≥5mm, TSPOT-: 108                                  | 35.6                                  | 0 (0%)                           | 320.8                        | 0                                      | Not estimated                          |
|                                    |                             | HIV                            | TSPOT+, TST <5mm: 53                                   | 35.6                                  | 0 (0%)                           | 157.4                        | 0                                      | Not estimated                          |
|                                    |                             | HIV                            | TST ≥5mm, TSPOT+: 32                                   | 35.6                                  | 4 (12.5%)                        | 95                           | 42.1 (15.8 to 112.2)                   | Not estimated                          |
|                                    |                             | All Contacts                   | QFT-GIT+: 61                                           | 20.4                                  | 6 (9.8%)                         | 103.4                        | 58 (26.1 to 129.2)                     | 19.6 (4.6 to 84.4)                     |
| Yoshiyama (2015) <sup>117</sup>    | NR                          | All Contacts                   | QFT-G+: 96                                             | 20.7                                  | 5 (5.2%)                         | 165.7                        | 30.2 (12.6 to 72.5)                    | 8.9 (3.3 to 23.8)                      |
| Yoshiyama (2010) <sup>118</sup>    | NR                          | All Contacts                   | QFT-GIT+: 421                                          | 33.3                                  | 14 (3.3%)                        | 1169.1                       | 12 (7.1 to 20.2)                       | 22.5 (7 to 72.3)                       |
|                                    |                             | All Contacts                   | TSPOT+: 73                                             | 40.7                                  | 2 (2.7%)                         | 247.8                        | 8.1 (2 to 32.3)                        | 7.2 (1.3 to 41.7)                      |
| Zellweger (2015) <sup>119</sup>    | NR                          | Recent Immigrants              | QFT-GIT+: 123                                          | 26.4                                  | 6 (4.9%)                         | 270.6                        | 22.2 (10 to 49.4)                      | 12.1 (3.6 to 40.1)                     |
|                                    |                             | Recent Immigrants              | TST ≥5mm: 479                                          | 82.8                                  | 76 (15.9%)                       | 3308.3                       | 23 (18.3 to 28.8)                      | Not estimated                          |
| Zhang (2010) <sup>121</sup>        | 38                          | HIV                            | TSPOT+: 16                                             | 36                                    | 0 (0%)                           | 48                           | 0                                      | Not estimated                          |
| Zhang (2013) <sup>122</sup>        | 26                          | Occupational Risk Factor       | TSPOT+: 29                                             | 60                                    | 1 (3.4%)                         | 145                          | 6.9 (1 to 49)                          | 0 events among negative                |
|                                    |                             | Occupational Risk Factor       | TST ≥10mm: 53                                          | 60                                    | 1 (1.9%)                         | 265                          | 3.8 (0.5 to 26.8)                      | 0 events among negative                |
|                                    |                             | Occupational Risk Factor       | TST ≥10mm, TSPOT+: 20                                  | 60                                    | 1 (5%)                           | 60                           | 16.7 (2.3 to 118.3)                    | Not estimated                          |

Abbreviations: FU, follow-up; TB, tuberculosis; IRR, incidence rate ratio; QFT-GIT, Quantiferon Gold-In-Tube; TST, tuberculin skin test; BMI, body mass index; HIV, human immunodeficiency virus; BCG, Bacillus Calmette-Guérin vaccination.

†Missing values were generally reported as age groupings (e.g. 0-9 years, 10-19 years, etc.); values may represent number enrolled or number positive, depending on reporting practices of each study.

**SECONDARY ANALYSIS.** Tables S10 through S19 detail our stratified analysis for our primary outcome of TB incidence per 1000 person years.

**Table S10. TB risk stratified by method of follow-up: active vs. passive. Data presented with IGRA tests combined and all contact types combined. Data only included in the table if at least one study in each category.**

| Population                          | Positive Test Result Definition | Active Follow-up             |                                                    |                | Passive Follow-up            |                                                    |                |
|-------------------------------------|---------------------------------|------------------------------|----------------------------------------------------|----------------|------------------------------|----------------------------------------------------|----------------|
|                                     |                                 | Number of Cohorts (PY of FU) | Random Effects Pooled TB Rate per 1000 PY (95% CI) | I <sup>2</sup> | Number of Cohorts (PY of FU) | Random Effects Pooled TB Rate per 1000 PY (95% CI) | I <sup>2</sup> |
| All Contacts                        | All IGRA Positive               | 13 (9438)                    | 16.6 (11.0 to 25.2)                                | 77%            | 6 (2305)                     | 18.5 (9 to 38.2)                                   | 79%            |
| All Contacts                        | TST ≥5mm                        | 7 (12201)                    | 13.6 (8.0 to 23.2)                                 | 87%            | 13 (79389)                   | 7.7 (4.4 to 13.6)                                  | 97%            |
| All Contacts                        | TST ≥10mm                       | 12 (14900)                   | 14.1 (8.5 to 23.3)                                 | 90%            | 16 (55216)                   | 8.8 (4.9 to 15.8)                                  | 95%            |
| All Contacts                        | TST ≥15mm                       | 3 (2654)                     | 18.8 (14.3 to 24.9)                                | 0%             | 6 (15586)                    | 10.3 (3.7 to 28.7)                                 | 96%            |
| HIV                                 | All IGRA Positive               | 8 (1488)                     | 15.6 (8.8 to 27.7)                                 | 38%            | 1 (158)                      | 25.3 (9.5 to 67.5)                                 | N/A            |
| HIV                                 | TST ≥5mm                        | 4 (997)                      | 15.7 (4.3 to 57.2)                                 | 84%            | 5 (2785)                     | 37.4 (21.1 to 66.3)                                | 82%            |
| Dialysis                            | All IGRA Positive               | 3 (292)                      | 0                                                  | 0%             | 1 (579)                      | 5.2 (1.7 to 16.1)                                  | N/A            |
| Immune Suppressing Medications      | All IGRA Positive               | 2 (155)                      | 0                                                  | 0%             | 1 (93)                       | 42.9 (16.1 to 114.2)                               | N/A            |
| Immune Suppressing Medications      | TST ≥5mm                        | 2 (276)                      | 0                                                  | 0%             | 3 (275)                      | 11.0 (3.5 to 34.0)                                 | 0%             |
| Transplant                          | All IGRA Positive               | 6 (614)                      | 10.4 (3.5 to 30.3)                                 | 23%            | 3 (378)                      | 2.6 (0.4 to 18.8)                                  | 0%             |
| Transplant                          | TST ≥5mm                        | 3 (125)                      | 0                                                  | 0%             | 4 (1592)                     | 1.5 (0 to 62.7)                                    | 60%            |
| Transplant                          | TST ≥10mm                       | 2 (63)                       | 72.9 (14.2 to 373.6)                               | 8%             | 1 (152)                      | 0                                                  | N/A            |
| Diabetes                            | All IGRA Positive               | 1 (526)                      | 7.6 (2.9 to 20.3)                                  | N/A            | 1 (316)                      | 0                                                  | N/A            |
| Age <18 Years                       | TST ≥10mm                       | 1 (2490)                     | 0                                                  | N/A            | 2 (28152)                    | 1.9 (0.4 to 8.3)                                   | 92%            |
| Age <18 Years                       | TST ≥15mm                       | 1 (1587)                     | 0                                                  | N/A            | 1 (4637)                     | 2.8 (1.6 to 4.8)                                   | N/A            |
| Recent Immigrant or Refugee Arrival | All IGRA Positive               | 2 (3862)                     | 9.8 (7.2 to 13.5)                                  | 0%             | 2 (811)                      | 15.7 (8.0 to 30.9)                                 | 31%            |
| Recent Immigrant or Refugee Arrival | TST ≥5mm                        | 1 (3874)                     | 5.4 (3.5 to 8.3)                                   | N/A            | 2 (4257)                     | 13 (5.2 to 32.5)                                   | 79%            |
| Recent Immigrant or Refugee Arrival | TST ≥10mm                       | 1 (2542)                     | 7.9 (5.1 to 12.2)                                  | N/A            | 4 (151963)                   | 1.3 (0.7 to 2.3)                                   | 88%            |
| Occupational Risk Factor            | All IGRA Positive               | 2 (225)                      | 4.4 (0.6 to 31.6)                                  | 0%             | 6 (3440)                     | 2.9 (1.6 to 5.4)                                   | 0%             |
| Occupational Risk Factor            | TST ≥10mm                       | 1 (32)                       | 31.4 (4.4 to 222.7)                                | N/A            | 5 (5548)                     | 2.5 (1.2 to 5.1)                                   | 30%            |

Abbreviations: PY, person years; TB, tuberculosis; TST, tuberculin skin test; QFT-G(IT), QuantiFERON Gold-In-Tube; HIV, human immunodeficiency virus; IRR, incidence rate ratio; BMI, body mass index; N/A, not applicable

**Table S11. TB risk stratified by mean/median duration of follow-up: ≤24 months vs. >24 months. Data presented with IGRA tests combined and all contact types combined. Data only included in the table if at least one study in each category.**

| Population                     | Positive Test Result Definition | ≤24 Months Follow-up         |                                                    |                | >24 Months Follow-up         |                                                    |                |
|--------------------------------|---------------------------------|------------------------------|----------------------------------------------------|----------------|------------------------------|----------------------------------------------------|----------------|
|                                |                                 | Number of Cohorts (PY of FU) | Random Effects Pooled TB Rate per 1000 PY (95% CI) | I <sup>2</sup> | Number of Cohorts (PY of FU) | Random Effects Pooled TB Rate per 1000 PY (95% CI) | I <sup>2</sup> |
| All Contacts                   | All IGRA Positive               | 7 (962)                      | 19.9 (6.9 to 57.3)                                 | 77%            | 12 (10781)                   | 15.3 (10.6 to 22.3)                                | 77%            |
| All Contacts                   | TST ≥5mm                        | 7 (4453)                     | 14.8 (6.7 to 32.4)                                 | 88%            | 13 (87138)                   | 7.4 (4.6 to 12)                                    | 97%            |
| All Contacts                   | TST ≥10mm                       | 14 (7445)                    | 15 (9 to 24.8)                                     | 84%            | 14 (62672)                   | 7.9 (4.3 to 14.4)                                  | 97%            |
| All Contacts                   | TST ≥15mm                       | 2 (861)                      | 13.9 (7.9 to 24.5)                                 | 0%             | 7 (17379)                    | 12.8 (5.3 to 31.3)                                 | 97%            |
| HIV                            | All IGRA Positive               | 3 (459)                      | 30.4 (17.7 to 52.4)                                | 3%             | 6 (1186)                     | 12.6 (7.6 to 21)                                   | 0%             |
| HIV                            | TST ≥5mm                        | 4 (716)                      | 54.4 (39.8 to 74.5)                                | 0%             | 5 (3065)                     | 15.8 (5.9 to 42.4)                                 | 90%            |
| Dialysis                       | All IGRA Positive               | 3 (292)                      | 0                                                  | 0%             | 1 (579)                      | 5.2 (1.7 to 16.1)                                  | N/A            |
| Dialysis                       | TST ≥5mm                        | 1 (112)                      | 0                                                  | N/A            | 1 (267)                      | 37.5 (20.2 to 69.6)                                | N/A            |
| Dialysis                       | TST ≥10mm                       | 2 (67)                       | 164.2 (90.9 to 296.5)                              | 0%             | 1 (186)                      | 43 (21.5 to 86)                                    | N/A            |
| Immune Suppressing Medications | All IGRA Positive               | 2 (155)                      | 0                                                  | 0%             | 1 (93)                       | 42.9 (16.1 to 114.2)                               | N/A            |
| Immune Suppressing Medications | TST ≥5mm                        | 2 (203)                      | 4.9 (0.7 to 34.9)                                  | 0%             | 3 (347)                      | 5.8 (1.4 to 23)                                    | 0%             |
| Transplant                     | All IGRA Positive               | 5 (471)                      | 14.9 (7.1 to 31.2)                                 | 0%             | 4 (522)                      | 1.9 (0.3 to 13.6)                                  | 0%             |
| Transplant                     | TST ≥5mm                        | 3 (116)                      | 0                                                  | 0%             | 4 (1600)                     | 1.5 (0 to 64.1)                                    | 61%            |
| Transplant                     | TST ≥10mm                       | 2 (63)                       | 72.9 (14.2 to 373.6)                               | 8%             | 1 (152)                      | 0                                                  | N/A            |
| Diabetes                       | All IGRA Positive               | 1 (526)                      | 7.6 (2.9 to 20.3)                                  | N/A            | 1 (316)                      | 0                                                  | N/A            |
| Age ≥65 Years                  | All IGRA Positive               | 1 (3557)                     | 11.5 (8.5 to 15.7)                                 | N/A            | 1 (195)                      | 5.1 (0.7 to 36.4)                                  | N/A            |
| Occupational Risk Factor       | All IGRA Positive               | 2 (1570)                     | 2.5 (1 to 6.8)                                     | 0%             | 6 (2095)                     | 3.3 (1.6 to 7)                                     | 0%             |
| Occupational Risk Factor       | TST ≥5mm                        | 1 (620)                      | 4.8 (1.6 to 15)                                    | N/A            | 2 (217)                      | 0                                                  | 0%             |
| Occupational Risk Factor       | TST ≥10mm                       | 3 (3813)                     | 3.5 (0.8 to 15.2)                                  | 64%            | 3 (1767)                     | 3.4 (1.5 to 7.6)                                   | 0%             |

Abbreviations: PY, person years; FU, follow-up; TB, tuberculosis; TST, tuberculin skin test; IGRA, interferon-gamma release assay; HIV, human immunodeficiency virus; N/A, not applicable



**Table S12. TB risk stratified by TB incidence in country of study: <30 per 100,000 vs. ≥30 per 100,000. Data presented with IGRA tests combined and all contact types combined. Data only included in the table if at least one study in each category.**

| Population                     | Positive Test Result Definition | <30 per 100,000              |                                                    |                | ≥30 per 100,000              |                                                    |                |
|--------------------------------|---------------------------------|------------------------------|----------------------------------------------------|----------------|------------------------------|----------------------------------------------------|----------------|
|                                |                                 | Number of Cohorts (PY of FU) | Random Effects Pooled TB Rate per 1000 PY (95% CI) | I <sup>2</sup> | Number of Cohorts (PY of FU) | Random Effects Pooled TB Rate per 1000 PY (95% CI) | I <sup>2</sup> |
| All Contacts                   | All IGRA Positive               | 14 (8058)                    | 19.3 (12.8 to 29.1)                                | 78%            | 5 (3684)                     | 11.3 (4.3 to 29.8)                                 | 78%            |
| All Contacts                   | TST ≥5mm                        | 12 (70895)                   | 7.1 (4 to 12.4)                                    | 97%            | 8 (20695)                    | 13.7 (7.4 to 25.5)                                 | 94%            |
| All Contacts                   | TST ≥10mm                       | 12 (51735)                   | 8.6 (4.6 to 16.2)                                  | 96%            | 16 (18381)                   | 11.8 (6.7 to 20.7)                                 | 93%            |
| All Contacts                   | TST ≥15mm                       | 7 (15827)                    | 13.1 (5.3 to 32.3)                                 | 96%            | 2 (2413)                     | 15.3 (11.1 to 21.2)                                | 0%             |
| HIV                            | All IGRA Positive               | 5 (620)                      | 17.8 (6.7 to 47.7)                                 | 49%            | 4 (1025)                     | 14.6 (8.8 to 24.3)                                 | 0%             |
| HIV                            | TST ≥5mm                        | 7 (2047)                     | 27.3 (14.6 to 51.3)                                | 77%            | 2 (1735)                     | 26.7 (6.8 to 105.6)                                | 87%            |
| Dialysis                       | All IGRA Positive               | 2 (247)                      | 0                                                  | 0%             | 2 (624)                      | 4.8 (1.6 to 14.9)                                  | 0%             |
| Dialysis                       | TST ≥10mm                       | 1 (186)                      | 43 (21.5 to 86)                                    | N/A            | 2 (67)                       | 164.2 (90.9 to 296.5)                              | 0%             |
| Immune Suppressing Medications | All IGRA Positive               | 2 (155)                      | 0                                                  | 0%             | 1 (93)                       | 42.9 (16.1 to 114.2)                               | N/A            |
| Immune Suppressing Medications | TST ≥5mm                        | 4 (449)                      | 4.5 (1.1 to 17.8)                                  | 0%             | 1 (102)                      | 9.8 (1.4 to 69.6)                                  | N/A            |
| Transplant                     | All IGRA Positive               | 5 (349)                      | 0                                                  | 0%             | 4 (644)                      | 12.8 (5.5 to 29.8)                                 | 26%            |
| Transplant                     | TST ≥5mm                        | 3 (382)                      | 0                                                  | 0%             | 4 (1335)                     | 6 (3 to 12)                                        | 0%             |
| Age <18 Years                  | TST ≥10mm                       | 2 (3821)                     | 0.5 (0 to 61.7)                                    | 87%            | 1 (26821)                    | 0.7 (0.4 to 1.1)                                   | N/A            |
| Age <18 Years                  | TST ≥15mm                       | 1 (1587)                     | 0                                                  | N/A            | 1 (4637)                     | 2.8 (1.6 to 4.8)                                   | N/A            |
| Occupational Risk Factor       | All IGRA Positive               | 5 (461)                      | 0                                                  | 0%             | 3 (3204)                     | 3.4 (1.9 to 6.2)                                   | 0%             |
| Occupational Risk Factor       | TST ≥5mm                        | 2 (217)                      | 0                                                  | 0%             | 1 (620)                      | 4.8 (1.6 to 15)                                    | N/A            |
| Occupational Risk Factor       | TST ≥10mm                       | 2 (174)                      | 0                                                  | 0%             | 4 (5406)                     | 3.1 (1.3 to 7.6)                                   | 49%            |

Abbreviations: PY, person years; FU, follow-up; TB, tuberculosis; TST, tuberculin skin test; IGRA, interferon-gamma release assay; HIV, human immunodeficiency virus; N/A, not applicable

**Table S13. TB risk stratified by study quality: high vs. moderate vs. low. Data presented with IGRA tests combined and all contact types combined. Data only included in the table at least one study in two of the three categories.**

| Population                          | Positive Test Result Definition | High Quality                 |                                                    |                | Moderate Quality             |                                                    |                | Low Quality                  |                                                    |                |
|-------------------------------------|---------------------------------|------------------------------|----------------------------------------------------|----------------|------------------------------|----------------------------------------------------|----------------|------------------------------|----------------------------------------------------|----------------|
|                                     |                                 | Number of Cohorts (PY of FU) | Random Effects Pooled TB Rate per 1000 PY (95% CI) | I <sup>2</sup> | Number of Cohorts (PY of FU) | Random Effects Pooled TB Rate per 1000 PY (95% CI) | I <sup>2</sup> | Number of Cohorts (PY of FU) | Random Effects Pooled TB Rate per 1000 PY (95% CI) | I <sup>2</sup> |
| All Contacts                        | All IGRA Positive               | 9 (9145)                     | 15.3 (9.1 to 25.6)                                 | 85%            | 7 (1016)                     | 22.4 (10.4 to 48.6)                                | 66%            | 3 (1583)                     | 13.3 (8.7 to 20.4)                                 | 0%             |
| All Contacts                        | TST ≥5mm                        | 6 (12022)                    | 11 (6.2 to 19.5)                                   | 87%            | 6 (12249)                    | 12.4 (6.6 to 23.5)                                 | 90%            | 8 (67319)                    | 6.1 (2.6 to 14.6)                                  | 99%            |
| All Contacts                        | TST ≥10mm                       | 9 (10498)                    | 13.7 (8.8 to 21.3)                                 | 81%            | 7 (5996)                     | 16.7 (9.2 to 30.4)                                 | 86%            | 12 (53622)                   | 6.7 (3.1 to 14.6)                                  | 97%            |
| All Contacts                        | TST ≥15mm                       | 3 (990)                      | 20.2 (13 to 31.3)                                  | 0%             | 1 (1889)                     | 16.9 (12 to 24)                                    | N/A            | 5 (15361)                    | 10.8 (3.3 to 35.1)                                 | 97%            |
| HIV                                 | All IGRA Positive               | 2 (700)                      | 14.3 (7.7 to 26.5)                                 | 0%             | 4 (456)                      | 6.3 (0.6 to 66.3)                                  | 71%            | 3 (489)                      | 22.5 (12.5 to 40.6)                                | 0%             |
| HIV                                 | TST ≥5mm                        | 2 (1735)                     | 26.7 (6.8 to 105.6)                                | 87%            | 4 (822)                      | 27.6 (7.8 to 98)                                   | 88%            | 3 (1225)                     | 18.8 (12.5 to 28.3)                                | 0%             |
| Dialysis                            | All IGRA Positive               | -                            | -                                                  | -              | 1 (579)                      | 5.2 (1.7 to 16.1)                                  | N/A            | 3 (292)                      | -                                                  | 0              |
| Dialysis                            | TST ≥10mm                       | 1 (53)                       | 132.1 (63 to 277)                                  | N/A            | 1 (14)                       | 285.7 (107.2 to 761.3)                             | N/A            | 1 (186)                      | 43 (21.5 to 86)                                    | N/A            |
| Immune Suppressing Medications      | All IGRA Positive               | -                            | -                                                  | -              | 1 (93)                       | 42.9 (16.1 to 114.2)                               | N/A            | 2 (155)                      | -                                                  | 0              |
| Silicosis                           | TST ≥10mm                       | 1 (337)                      | 26.7 (13.9 to 51.4)                                | N/A            | 1 (1129)                     | 39.9 (29.8 to 53.4)                                | N/A            | -                            | -                                                  | -              |
| Transplant                          | All IGRA Positive               | 1 (245)                      | 12.2 (3.9 to 37.9)                                 | N/A            | 4 (542)                      | 8.4 (2 to 34.9)                                    | 51%            | 4 (205)                      | -                                                  | 0              |
| Transplant                          | TST ≥5mm                        | 1 (992)                      | 8.1 (4 to 16.1)                                    | N/A            | 5 (701)                      | 0                                                  | 0%             | 1 (23)                       | -                                                  | 0              |
| Transplant                          | TST ≥10mm                       | 1 (42)                       | 119 (49.6 to 286)                                  | N/A            | 2 (173)                      | 0                                                  | 0%             | -                            | -                                                  | -              |
| Diabetes                            | All IGRA Positive               | 1 (526)                      | 7.6 (2.9 to 20.3)                                  | N/A            | -                            | -                                                  | -              | 1 (316)                      | -                                                  | 0              |
| Age <18 Years                       | TST ≥10mm                       | -                            | -                                                  | -              | 1 (26821)                    | 0.7 (0.4 to 1.1)                                   | N/A            | 2 (3821)                     | 0.5 (0 to 61.7)                                    | 87%            |
| Age <18 Years                       | TST ≥15mm                       | -                            | -                                                  | -              | 1 (4637)                     | 2.8 (1.6 to 4.8)                                   | N/A            | 1 (1587)                     | 0                                                  | N/A            |
| Age ≥65 Years                       | All IGRA Positive               | 1 (3557)                     | 11.5 (8.5 to 15.7)                                 | N/A            | 1 (195)                      | 5.1 (0.7 to 36.4)                                  | N/A            | -                            | -                                                  | -              |
| Age ≥65 Years                       | TST ≥10mm                       | -                            | -                                                  | -              | 1 (500)                      | 6 (1.9 to 18.6)                                    | N/A            | 1 (3438)                     | 3.2 (1.8 to 5.8)                                   | N/A            |
| Recent Immigrant or Refugee Arrival | All IGRA Positive               | 2 (3862)                     | 9.8 (7.2 to 13.5)                                  | 0%             | 1 (541)                      | 11.1 (5 to 24.7)                                   | N/A            | 1 (271)                      | 22.2 (10 to 49.4)                                  | N/A            |
| Recent Immigrant or Refugee Arrival | TST ≥5mm                        | 1 (3874)                     | 5.4 (3.5 to 8.3)                                   | N/A            | 1 (949)                      | 6.3 (2.8 to 14.1)                                  | N/A            | 1 (3308)                     | 23 (18.3 to 28.8)                                  | N/A            |
| Recent Immigrant or Refugee Arrival | TST ≥10mm                       | 1 (2542)                     | 7.9 (5.1 to 12.2)                                  | N/A            | -                            | -                                                  | -              | 4 (151963)                   | 1.3 (0.7 to 2.3)                                   | 88%            |
| Recent Immigrant or Refugee Arrival | TST ≥15mm                       | -                            | -                                                  | -              | 1 (277)                      | 10.8 (3.5 to 33.5)                                 | N/A            | 2 (83945)                    | 1.2 (1 to 1.4)                                     | 0%             |
| Prisoners                           | TST ≥10mm                       | -                            | -                                                  | -              | 2 (701)                      | 27.8 (3.1 to 246.4)                                | 92%            | 1 (76)                       | 118.4 (61.6 to 227.6)                              | N/A            |
| Occupational Risk Factor            | All IGRA Positive               | 2 (169)                      | 5.9 (0.8 to 41.9)                                  | 0%             | 4 (1847)                     | 2.2 (0.8 to 5.8)                                   | 0%             | 2 (1649)                     | 3.6 (1.6 to 8.1)                                   | 0%             |
| Occupational Risk Factor            | TST ≥5mm                        | 1 (81)                       | 0                                                  | N/A            | 2 (756)                      | 4 (1.3 to 12.3)                                    | 0%             | -                            | -                                                  | -              |
| Occupational Risk Factor            | TST ≥10mm                       | 2 (89)                       | 11.3 (1.6 to 80.1)                                 | 0%             | 3 (3898)                     | 2 (0.7 to 6)                                       | 37%            | 1 (1592)                     | 3.8 (1.7 to 8.4)                                   | N/A            |

Abbreviations: PY, person years; FU, follow-up; TB, tuberculosis; TST, tuberculin skin test; IGRA, interferon-gamma release assay; HIV, human immunodeficiency virus; N/A, not applicable

**Table S14. TB risk stratified by study design: prospective cohort vs. retrospective cohort. Data presented with IGRA tests combined and all contact types combined. Data only included in the table if at least one study in each category.**

| Population                          | Positive Test Result Definition | Prospective Cohort           |                                                    |                | Retrospective Cohort         |                                                    |                |
|-------------------------------------|---------------------------------|------------------------------|----------------------------------------------------|----------------|------------------------------|----------------------------------------------------|----------------|
|                                     |                                 | Number of Studies (PY of FU) | Random Effects Pooled TB Rate per 1000 PY (95% CI) | I <sup>2</sup> | Number of Cohorts (PY of FU) | Random Effects Pooled TB Rate per 1000 PY (95% CI) | I <sup>2</sup> |
| All Contacts                        | All IGRA Positive               | 17 (11474)                   | 15.3 (10.1 to 23.2)                                | 82%            | 2 (269)                      | 40.9 (22.6 to 73.8)                                | 0%             |
| All Contacts                        | TST ≥5mm                        | 10 (27255)                   | 11.3 (7.4 to 17)                                   | 89%            | 10 (64335)                   | 7.8 (3.8 to 16)                                    | 98%            |
| All Contacts                        | TST ≥10mm                       | 17 (22283)                   | 10.2 (6.4 to 16.1)                                 | 89%            | 10 (47225)                   | 9.2 (4.3 to 19.7)                                  | 97%            |
| All Contacts                        | TST ≥15mm                       | 4 (2880)                     | 18.1 (13.8 to 23.7)                                | 0%             | 5 (15361)                    | 10.8 (3.3 to 35.1)                                 | 97%            |
| HIV                                 | All IGRA Positive               | 8 (1488)                     | 15.6 (8.8 to 27.7)                                 | 38%            | 1 (158)                      | 25.3 (9.5 to 67.5)                                 | N/A            |
| Immune Suppressing Medications      | All IGRA Positive               | 2 (155)                      | 0                                                  | 0%             | 1 (93)                       | 42.9 (16.1 to 114.2)                               | N/A            |
| Immune Suppressing Medications      | TST ≥5mm                        | 1 (110)                      | 0                                                  | N/A            | 4 (441)                      | 6.8 (2.2 to 21.1)                                  | 0%             |
| Transplant                          | All IGRA Positive               | 5 (369)                      | 6.8 (0.9 to 52.5)                                  | 52%            | 3 (378)                      | 2.6 (0.4 to 18.8)                                  | 0%             |
| Transplant                          | TST ≥5mm                        | 3 (125)                      | 0                                                  | 0%             | 4 (1592)                     | 1.5 (0 to 62.7)                                    | 60%            |
| Transplant                          | TST ≥10mm                       | 2 (63)                       | 72.9 (14.2 to 373.6)                               | 8%             | 1 (152)                      | 0                                                  | N/A            |
| Age <18 Years                       | TST ≥10mm                       | 2 (29311)                    | 0.6 (0.4 to 1)                                     | 0%             | 1 (1331)                     | 6 (3 to 12)                                        | N/A            |
| Recent Immigrant or Refugee Arrival | All IGRA Positive               | 2 (3862)                     | 9.8 (7.2 to 13.5)                                  | 0%             | 2 (811)                      | 15.7 (8.0 to 30.9)                                 | 31%            |
| Recent Immigrant or Refugee Arrival | TST ≥5mm                        | 1 (3874)                     | 5.4 (3.5 to 8.3)                                   | N/A            | 2 (4257)                     | 13 (5.2 to 32.5)                                   | 79%            |
| Recent Immigrant or Refugee Arrival | TST ≥10mm                       | 1 (2542)                     | 7.9 (5.1 to 12.2)                                  | N/A            | 4 (151963)                   | 1.3 (0.7 to 2.3)                                   | 88%            |
| Occupational Risk Factor            | All IGRA Positive               | 7 (2175)                     | 3.2 (1.5 to 6.8)                                   | 0%             | 1 (1490)                     | 2.7 (1 to 7.2)                                     | N/A            |
| Occupational Risk Factor            | TST ≥5mm                        | 2 (217)                      | 0                                                  | 0%             | 1 (620)                      | 4.8 (1.6 to 15)                                    | N/A            |
| Occupational Risk Factor            | TST ≥10mm                       | 4 (1798)                     | 3.9 (1.9 to 8.2)                                   | 0%             | 2 (3781)                     | 2.2 (0.7 to 7.3)                                   | 54%            |

Abbreviations: PY, person years; FU, follow-up; TB, tuberculosis; TST, tuberculin skin test; IGRA, interferon-gamma release assay; HIV, human immunodeficiency virus; N/A, not applicable

**Table S15. TB risk stratified by year of study start: 2005 or earlier vs. 2006 or later. Data presented with IGRA tests combined and all contact types combined. Data only included in the table if at least one study in each category.**

| Population                          | Positive Test Result Definition | 2005 or Earlier              |                                                    |                       | 2006 or Later                |                                                    |                       |
|-------------------------------------|---------------------------------|------------------------------|----------------------------------------------------|-----------------------|------------------------------|----------------------------------------------------|-----------------------|
|                                     |                                 | Number of Cohorts (PY of FU) | Random Effects Pooled TB Rate per 1000 PY (95% CI) | <i>I</i> <sup>2</sup> | Number of Cohorts (PY of FU) | Random Effects Pooled TB Rate per 1000 PY (95% CI) | <i>I</i> <sup>2</sup> |
| All Contacts                        | All IGRA Positive               | 2 (692)                      | 34.7 (23.2 to 51.7)                                | 0%                    | 17 (11050)                   | 15.3 (9.9 to 23.6)                                 | 82%                   |
| All Contacts                        | TST ≥5mm                        | 14 (81545)                   | 7.5 (4.4 to 12.9)                                  | 97%                   | 6 (10046)                    | 14.5 (7.5 to 28.2)                                 | 89%                   |
| All Contacts                        | TST ≥10mm                       | 16 (57351)                   | 9.4 (4.9 to 17.8)                                  | 97%                   | 12 (12766)                   | 12.4 (8.2 to 18.7)                                 | 80%                   |
| All Contacts                        | TST ≥15mm                       | 8 (17812)                    | 11.9 (5.4 to 26.2)                                 | 96%                   | 1 (428)                      | 25.7 (14.2 to 46.4)                                | N/A                   |
| HIV                                 | TST ≥5mm                        | 6 (3062)                     | 40.2 (24.9 to 64.7)                                | 80%                   | 3 (720)                      | 9.5 (2.1 to 42.5)                                  | 70%                   |
| Dialysis                            | TST ≥10mm                       | 2 (67)                       | 164.2 (90.9 to 296.5)                              | 0%                    | 1 (186)                      | 43 (21.5 to 86)                                    | N/A                   |
| Immune Suppressing Medications      | TST ≥5mm                        | 2 (259)                      | 3.9 (0.5 to 27.4)                                  | 0%                    | 3 (291)                      | 6.9 (1.7 to 27.5)                                  | 0%                    |
| Transplant                          | TST ≥5mm                        | 4 (1592)                     | 1.5 (0 to 62.7)                                    | 60%                   | 3 (125)                      | 0                                                  | 0%                    |
| Transplant                          | TST ≥10mm                       | 2 (194)                      | 8.4 (0.1 to 1241.7)                                | 87%                   | 1 (21)                       | 0                                                  | N/A                   |
| Age ≥65 Years                       | TST ≥10mm                       | 1 (3438)                     | 3.2 (1.8 to 5.8)                                   | N/A                   | 1 (500)                      | 6 (1.9 to 18.6)                                    | N/A                   |
| Recent Immigrant or Refugee Arrival | All IGRA Positive               | 2 (811)                      | 15.7 (8.0 to 30.9)                                 | 31%                   | 2 (3862)                     | 9.8 (7.2 to 13.5)                                  | 0%                    |
| Recent Immigrant or Refugee Arrival | TST ≥5mm                        | 2 (4257)                     | 13 (5.2 to 32.5)                                   | 79%                   | 1 (3874)                     | 5.4 (3.5 to 8.3)                                   | N/A                   |
| Recent Immigrant or Refugee Arrival | TST ≥10mm                       | 3 (151791)                   | 1.3 (0.7 to 2.4)                                   | 92%                   | 2 (2713)                     | 7.4 (4.8 to 11.4)                                  | 0%                    |
| Occupational Risk Factor            | All IGRA Positive               | 3 (1762)                     | 4 (1.9 to 8.3)                                     | 0%                    | 5 (1903)                     | 2.1 (0.8 to 5.6)                                   | 0%                    |
| Occupational Risk Factor            | TST ≥5mm                        | 2 (756)                      | 4 (1.3 to 12.3)                                    | 0%                    | 1 (81)                       | 0                                                  | N/A                   |
| Occupational Risk Factor            | TST ≥10mm                       | 3 (2182)                     | 4.1 (2.1 to 7.9)                                   | 0%                    | 3 (3398)                     | 1.5 (0.6 to 3.5)                                   | 0%                    |

Abbreviations: PY, person years; FU, follow-up; TB, tuberculosis; TST, tuberculin skin test; IGRA, interferon-gamma release assay; HIV, human immunodeficiency virus; N/A, not applicable

**Table S16. TB risk stratified by country-level income: high-income vs. low, low-middle, or upper-middle income. Data presented with IGRA tests combined and all contact types combined. Data only included in the table if at least one study in each category.**

| Population               | Positive Test Result Definition | High Income                  |                                                    |                | Low, Low-Middle, Upper-Middle Income |                                                    |                |
|--------------------------|---------------------------------|------------------------------|----------------------------------------------------|----------------|--------------------------------------|----------------------------------------------------|----------------|
|                          |                                 | Number of Cohorts (PY of FU) | Random Effects Pooled TB Rate per 1000 PY (95% CI) | I <sup>2</sup> | Number of Cohorts (PY of FU)         | Random Effects Pooled TB Rate per 1000 PY (95% CI) | I <sup>2</sup> |
| All Contacts             | All IGRA Positive               | 16 (9356)                    | 18.2 (12.4 to 26.9)                                | 78%            | 3 (2387)                             | 3.2 (0 to 219.9)                                   | 78%            |
| All Contacts             | TST ≥5mm                        | 14 (75352)                   | 6.4 (3.9 to 10.7)                                  | 96%            | 6 (16238)                            | 20.3 (12.8 to 32.3)                                | 87%            |
| All Contacts             | TST ≥10mm                       | 17 (60438)                   | 7.6 (4.4 to 13)                                    | 95%            | 11 (9678)                            | 18.5 (11.4 to 29.9)                                | 88%            |
| All Contacts             | TST ≥15mm                       | 8 (16351)                    | 12.5 (5.6 to 28)                                   | 95%            | 1 (1889)                             | 16.9 (12 to 24)                                    | N/A            |
| HIV                      | All IGRA Positive               | 8 (2463)                     | 23.4 (12.5 to 43.9)                                | 79%            | 1 (1319)                             | 65.2 (52.8 to 80.5)                                | N/A            |
| Dialysis                 | TST ≥10mm                       | 2 (239)                      | 69.2 (31.6 to 151.9)                               | 56%            | 1 (14)                               | 285.7 (107.2 to 761.3)                             | N/A            |
| Transplant               | TST ≥5mm                        | 6 (1475)                     | 2.9 (0.1 to 67.2)                                  | 33%            | 1 (242)                              | 0                                                  | N/A            |
| Transplant               | TST ≥10mm                       | 1 (21)                       | 0                                                  | N/A            | 2 (194)                              | 8.4 (0.1 to 1241.7)                                | 87%            |
| Diabetes                 | All IGRA Positive               | 1 (316)                      | 0                                                  | N/A            | 1 (526)                              | 7.6 (2.9 to 20.3)                                  | N/A            |
| Age <18 Years            | TST ≥10mm                       | 2 (28152)                    | 1.9 (0.4 to 8.3)                                   | 92%            | 1 (2490)                             | 0                                                  | N/A            |
| Age <18 Years            | TST ≥15mm                       | 1 (4637)                     | 2.8 (1.6 to 4.8)                                   | N/A            | 1 (1587)                             | 0                                                  | N/A            |
| Age ≥65 Years            | All IGRA Positive               | 1 (195)                      | 5.1 (0.7 to 36.4)                                  | N/A            | 1 (3557)                             | 11.5 (8.5 to 15.7)                                 | N/A            |
| Occupational Risk Factor | All IGRA Positive               | 6 (1951)                     | 2 (0.8 to 5.5)                                     | 0%             | 2 (1714)                             | 4.1 (1.9 to 8.6)                                   | 0%             |
| Occupational Risk Factor | TST ≥5mm                        | 2 (217)                      | 0                                                  | 0%             | 1 (620)                              | 4.8 (1.6 to 15)                                    | N/A            |
| Occupational Risk Factor | TST ≥10mm                       | 4 (3515)                     | 1.4 (0.6 to 3.4)                                   | 0%             | 2 (2064)                             | 4.4 (2.3 to 8.4)                                   | 0%             |

Abbreviations: PY, person years; FU, follow-up; TB, tuberculosis; TST, tuberculin skin test; IGRA, interferon-gamma release assay; HIV, human immunodeficiency virus; N/A, not applicable

**Table S17. TB risk stratified by TB diagnosis method: microbiological only vs. microbiological and clinical vs. not specified. Data presented with IGRA tests combined and all contact types combined. Data only included in the table if at least one study in two of the three categories.**

| Population                          | Positive Test Result Definition | Microbiological              |                                                    |                | Microbiological and Clinical |                                                    |                | Not Specified                |                                                    |                |
|-------------------------------------|---------------------------------|------------------------------|----------------------------------------------------|----------------|------------------------------|----------------------------------------------------|----------------|------------------------------|----------------------------------------------------|----------------|
|                                     |                                 | Number of Cohorts (PY of FU) | Random Effects Pooled TB Rate per 1000 PY (95% CI) | I <sup>2</sup> | Number of Cohorts (PY of FU) | Random Effects Pooled TB Rate per 1000 PY (95% CI) | I <sup>2</sup> | Number of Cohorts (PY of FU) | Random Effects Pooled TB Rate per 1000 PY (95% CI) | I <sup>2</sup> |
| All Contacts                        | All IGRA Positive               | -                            | -                                                  | -              | 12 (9540)                    | 19.1 (12.4 to 29.3)                                | 84%            | 7 (2202)                     | 12.2 (4.9 to 30.4)                                 | 72%            |
| All Contacts                        | TST ≥5mm                        | 1 (188)                      | 53.2 (28.6 to 98.9)                                | N/A            | 17 (89709)                   | 7.8 (4.9 to 12.4)                                  | 97%            | 2 (1693)                     | 16.4 (7.8 to 34.5)                                 | 69%            |
| All Contacts                        | TST ≥10mm                       | 2 (2160)                     | 23.1 (6.1 to 88.4)                                 | 91%            | 18 (43100)                   | 11.9 (7.3 to 19.3)                                 | 95%            | 8 (24856)                    | 5.8 (2.5 to 13.3)                                  | 89%            |
| All Contacts                        | TST ≥15mm                       | -                            | -                                                  | -              | 8 (17812)                    | 11.9 (5.4 to 26.2)                                 | 96%            | 1 (428)                      | 25.7 (14.2 to 46.4)                                | N/A            |
| HIV                                 | All IGRA Positive               | 1 (252)                      | 15.8 (5.9 to 42.2)                                 | N/A            | 4 (901)                      | 19.9 (9.6 to 41.1)                                 | 54%            | 4 (492)                      | 14.2 (6.8 to 29.8)                                 | 0%             |
| HIV                                 | TST ≥5mm                        | 4 (1033)                     | 34.9 (16.5 to 73.9)                                | 77%            | 2 (1440)                     | 61.8 (50.2 to 76.1)                                | 0%             | 3 (1309)                     | 13.1 (3.9 to 44.7)                                 | 68%            |
| Dialysis                            | All IGRA Positive               | -                            | -                                                  | -              | 1 (579)                      | 5.2 (1.7 to 16.1)                                  | N/A            | 3 (292)                      | 0                                                  | 0%             |
| Dialysis                            | TST ≥5mm                        | -                            | -                                                  | -              | 1 (267)                      | 37.5 (20.2 to 69.6)                                | N/A            | 1 (112)                      | 0                                                  | N/A            |
| Dialysis                            | TST ≥10mm                       | -                            | -                                                  | -              | 2 (239)                      | 69.2 (31.6 to 151.9)                               | 56%            | 1 (14)                       | 285.7 (107.2 to 761.3)                             | N/A            |
| Immune Suppressing Medications      | All IGRA Positive               | -                            | -                                                  | -              | 1 (93)                       | 42.9 (16.1 to 114.2)                               | N/A            | 2 (155)                      | 0                                                  | 0%             |
| Immune Suppressing Medications      | TST ≥5mm                        | -                            | -                                                  | -              | 2 (195)                      | 10.2 (2.6 to 40.9)                                 | 0%             | 3 (355)                      | 2.8 (0.4 to 20)                                    | 0%             |
| Transplant                          | All IGRA Positive               | -                            | -                                                  | -              | 2 (326)                      | 21.3 (7.2 to 62.9)                                 | 46%            | 7 (667)                      | 3 (0.8 to 12)                                      | 0%             |
| Transplant                          | TST ≥5mm                        | 2 (1052)                     | 7.6 (3.8 to 15.2)                                  | 0%             | 2 (367)                      | 0                                                  | 0%             | 3 (298)                      | 0                                                  | 0%             |
| Transplant                          | TST ≥10mm                       | 1 (42)                       | 119 (49.6 to 286)                                  | N/A            | -                            | -                                                  | -              | 2 (173)                      | 0                                                  | 0%             |
| Diabetes                            | All IGRA Positive               | -                            | -                                                  | -              | 1 (526)                      | 7.6 (2.9 to 20.3)                                  | N/A            | 1 (316)                      | 0                                                  | N/A            |
| Age <18 Years                       | TST ≥10mm                       | -                            | -                                                  | -              | 2 (28152)                    | 1.9 (0.4 to 8.3)                                   | 92%            | 1 (2490)                     | 0                                                  | N/A            |
| Age <18 Years                       | TST ≥15mm                       | -                            | -                                                  | -              | 1 (4637)                     | 2.8 (1.6 to 4.8)                                   | N/A            | 1 (1587)                     | 0                                                  | N/A            |
| Age ≥65 Years                       | All IGRA Positive               | 1 (195)                      | 5.1 (0.7 to 36.4)                                  | N/A            | 1 (3557)                     | 11.5 (8.5 to 15.7)                                 | N/A            | -                            | -                                                  | -              |
| Age ≥65 Years                       | TST ≥10mm                       | 1 (500)                      | 6 (1.9 to 18.6)                                    | N/A            | 1 (3438)                     | 3.2 (1.8 to 5.8)                                   | N/A            | -                            | -                                                  | -              |
| Recent Immigrant or Refugee Arrival | All IGRA Positive               | -                            | -                                                  | -              | 3 (4133)                     | 10.6 (7.9 to 14.3)                                 | 0%             | 1 (541)                      | 11.1 (5 to 24.7)                                   | N/A            |
| Recent Immigrant or Refugee Arrival | TST ≥5mm                        | -                            | -                                                  | -              | 2 (7183)                     | 11.3 (4.1 to 30.9)                                 | 94%            | 1 (949)                      | 6.3 (2.8 to 14.1)                                  | N/A            |
| Recent Immigrant or Refugee Arrival | TST ≥10mm                       | -                            | -                                                  | -              | 4 (154333)                   | 2 (0.9 to 4.8)                                     | 97%            | 1 (172)                      | 0                                                  | N/A            |
| Recent Immigrant or Refugee Arrival | TST ≥15mm                       | -                            | -                                                  | -              | 2 (83945)                    | 1.2 (1 to 1.4)                                     | 0%             | 1 (277)                      | 10.8 (3.5 to 33.5)                                 | N/A            |
| Prisoners                           | TST ≥10mm                       | 2 (701)                      | 27.8 (3.1 to 246.4)                                | 92%            | 1 (76)                       | 118.4 (61.6 to 227.6)                              | N/A            | -                            | -                                                  | -              |
| Occupational Risk Factor            | All IGRA Positive               | 3 (454)                      | 2.2 (0.3 to 15.6)                                  | 0%             | -                            | -                                                  | -              | 5 (3211)                     | 3.1 (1.7 to 5.8)                                   | 0%             |
| Occupational Risk Factor            | TST ≥5mm                        | -                            | -                                                  | -              | 1 (620)                      | 4.8 (1.6 to 15)                                    | N/A            | 2 (217)                      | 0                                                  | 0%             |
| Occupational Risk Factor            | TST ≥10mm                       | -                            | -                                                  | -              | 1 (472)                      | 6.4 (2 to 19.7)                                    | N/A            | 5 (5108)                     | 2.3 (1 to 5)                                       | 23%            |

Abbreviations: PY, person years; FU, follow-up; TB, tuberculosis; TST, tuberculin skin test; IGRA, interferon-gamma release assay; HIV, human immunodeficiency virus; N/A, not applicable

**Table S18. TB risk stratified by proportion of patients excluded due to treatment: <20% vs. ≥20%. Data presented with IGRA tests combined and all contact types combined. Data only included in the table if at least one study in each category.**

| Population                          | Positive Test Result Definition | <20% Treated                 |                                                    |                | ≥20% Treated                 |                                                    |                |
|-------------------------------------|---------------------------------|------------------------------|----------------------------------------------------|----------------|------------------------------|----------------------------------------------------|----------------|
|                                     |                                 | Number of Cohorts (PY of FU) | Random Effects Pooled TB Rate per 1000 PY (95% CI) | I <sup>2</sup> | Number of Cohorts (PY of FU) | Random Effects Pooled TB Rate per 1000 PY (95% CI) | I <sup>2</sup> |
| All Contacts                        | All IGRA Positive               | 8 (7512)                     | 13.6 (8.7 to 21.4)                                 | 60%            | 11 (4231)                    | 21.8 (13.3 to 35.7)                                | 79%            |
| All Contacts                        | TST ≥5mm                        | 10 (44741)                   | 10.8 (7.0 to 16.6)                                 | 93%            | 10 (46846)                   | 8.2 (4.0 to 16.9)                                  | 97%            |
| All Contacts                        | TST ≥10mm                       | 17 (38172)                   | 9.1 (5.2 to 15.7)                                  | 94%            | 11 (31943)                   | 12.3 (6.3 to 24.1)                                 | 95%            |
| All Contacts                        | TST ≥15mm                       | 3 (2750)                     | 16.0 (11.9 to 21.5)                                | 0%             | 6 (15490)                    | 12.2 (4.3 to 34.5)                                 | 97%            |
| HIV                                 | All IGRA Positive               | 3 (743)                      | 18.1 (6.7 to 49)                                   | 65%            | 6 (903)                      | 16.6 (10 to 27.6)                                  | 0%             |
| HIV                                 | TST ≥5mm                        | 2 (398)                      | 45.2 (28.5 to 71.8)                                | 0%             | 7 (3384)                     | 24 (11.2 to 51.4)                                  | 90%            |
| Dialysis                            | TST ≥5mm                        | 1 (267)                      | 37.5 (20.2 to 69.6)                                | N/A            | 1 (112)                      | 0                                                  | N/A            |
| Dialysis                            | TST ≥10mm                       | 2 (624)                      | 4.8 (1.6 to 14.9)                                  | 0%             | 2 (247)                      | 0                                                  | 0%             |
| Transplant                          | All IGRA Positive               | 6 (643)                      | 6 (1.3 to 27.4)                                    | 49%            | 3 (350)                      | 8.6 (2.8 to 26.6)                                  | 0%             |
| Transplant                          | TST ≥5mm                        | 4 (1391)                     | 4.9 (0.3 to 93.3)                                  | 9%             | 3 (325)                      | 0                                                  | 0%             |
| Transplant                          | TST ≥10mm                       | 1 (21)                       | 0                                                  | N/A            | 2 (194)                      | 8.4 (0.1 to 1241.7)                                | 87%            |
| Age ≥65 Years                       | TST ≥10mm                       | 1 (500)                      | 6.0 (1.9 to 18.6)                                  | N/A            | 1 (3438)                     | 3.2 (1.8 to 5.8)                                   | N/A            |
| Recent Immigrant or Refugee Arrival | All IGRA Positive               | 3 (4403)                     | 10 (7.4 to 13.4)                                   | 0%             | 1 (271)                      | 22.2 (10 to 49.4)                                  | N/A            |
| Recent Immigrant or Refugee Arrival | TST ≥5mm                        | 2 (4823)                     | 5.6 (3.8 to 8.2)                                   | 0%             | 1 (3308)                     | 23 (18.3 to 28.8)                                  | N/A            |
| Recent Immigrant or Refugee Arrival | TST ≥10mm                       | 4 (154333)                   | 2 (0.9 to 4.8)                                     | 97%            | 1 (172)                      | 0                                                  | N/A            |
| Occupational Risk Factor            | TST ≥10mm                       | 5 (5548)                     | 2.5 (1.2 to 5.1)                                   | 30%            | 1 (32)                       | 31.4 (4.4 to 222.7)                                | N/A            |

Abbreviations: PY, person years; FU, follow-up; TB, tuberculosis; TST, tuberculin skin test; IGRA, interferon-gamma release assay; HIV, human immunodeficiency virus; N/A, not applicable

**Table S19. TB risk stratified by country-level BCG vaccination policy: none or at birth vs. multiple or post-infancy. Data presented with IGRA tests combined and all contact types combined. Data only included in the table if at least one study in each category.**

| Population                          | Positive Test Result Definition | BCG Policy: None or At Birth |                                                    |                | BCG Policy: Multiple or Post-Infancy |                                                    |                |
|-------------------------------------|---------------------------------|------------------------------|----------------------------------------------------|----------------|--------------------------------------|----------------------------------------------------|----------------|
|                                     |                                 | Number of Cohorts (PY of FU) | Random Effects Pooled TB Rate per 1000 PY (95% CI) | I <sup>2</sup> | Number of Cohorts (PY of FU)         | Random Effects Pooled TB Rate per 1000 PY (95% CI) | I <sup>2</sup> |
| All Contacts                        | All IGRA Positive               | 4 (3137)                     | 28.4 (23 to 34.9)                                  | 0%             | 15 (8606)                            | 14.9 (9.7 to 22.9)                                 | 75%            |
| All Contacts                        | TST ≥5mm                        | 13 (60196)                   | 10.3 (5.8 to 18.2)                                 | 97%            | 7 (31391)                            | 7.7 (4.1 to 14.4)                                  | 92%            |
| All Contacts                        | TST ≥10mm                       | 15 (38183)                   | 14.8 (8.6 to 25.4)                                 | 96%            | 13 (31932)                           | 6.5 (3.6 to 11.6)                                  | 89%            |
| All Contacts                        | TST ≥15mm                       | 8 (17716)                    | 13.6 (6.2 to 29.8)                                 | 96%            | 1 (524)                              | 9.5 (4 to 22.9)                                    | N/A            |
| HIV                                 | TST ≥5mm                        | 4 (1466)                     | 30.3 (15.8 to 58)                                  | 67%            | 5 (2316)                             | 22.2 (7.5 to 65.7)                                 | 92%            |
| Immune Suppressing Medications      | TST ≥5mm                        | 3 (339)                      | 5.9 (1.5 to 23.6)                                  | 0%             | 2 (212)                              | 4.7 (0.7 to 33.5)                                  | 0%             |
| Transplant                          | All IGRA Positive               | 3 (245)                      | 0                                                  | 0%             | 6 (748)                              | 10.4 (4.5 to 24.1)                                 | 19%            |
| Transplant                          | TST ≥5mm                        | 2 (358)                      | 0                                                  | 0%             | 5 (1358)                             | 5.9 (2.9 to 11.8)                                  | 0%             |
| Transplant                          | TST ≥10mm                       | 1 (42)                       | 119 (49.6 to 286)                                  | N/A            | 2 (173)                              | 0                                                  | 0%             |
| Diabetes                            | All IGRA Positive               | 1 (526)                      | 7.6 (2.9 to 20.3)                                  | N/A            | 1 (316)                              | 0                                                  | N/A            |
| Age <18 Years                       | TST ≥10mm                       | 1 (1331)                     | 6 (3 to 12)                                        | N/A            | 2 (29311)                            | 0.6 (0.4 to 1)                                     | 0%             |
| Age ≥65 Years                       | TST ≥10mm                       | 1 (3557)                     | 11.5 (8.5 to 15.7)                                 | N/A            | 1 (195)                              | 5.1 (0.7 to 36.4)                                  | N/A            |
| Recent Immigrant or Refugee Arrival | All IGRA Positive               | 1 (541)                      | 11.1 (5 to 24.7)                                   | N/A            | 3 (4133)                             | 10.6 (7.9 to 14.3)                                 | 0%             |
| Recent Immigrant or Refugee Arrival | TST ≥5mm                        | 1 (949)                      | 6.3 (2.8 to 14.1)                                  | N/A            | 2 (7183)                             | 11.3 (4.1 to 30.9)                                 | 94%            |
| Recent Immigrant or Refugee Arrival | TST ≥10mm                       | 1 (8549)                     | 2.9 (2 to 4.3)                                     | N/A            | 4 (145955)                           | 1.7 (0.6 to 4.8)                                   | 96%            |
| Recent Immigrant or Refugee Arrival | TST ≥15mm                       | 1 (277)                      | 10.8 (3.5 to 33.5)                                 | N/A            | 2 (83945)                            | 1.2 (1 to 1.4)                                     | 0%             |
| Prisoners                           | TST ≥10mm                       | 2 (719)                      | 26.1 (3.3 to 208.2)                                | 92%            | 1 (58)                               | 137.9 (69 to 275.8)                                | N/A            |
| Occupational Risk Factor            | TST ≥10mm                       | 5 (5548)                     | 2.5 (1.2 to 5.1)                                   | 30%            | 1 (32)                               | 31.4 (4.4 to 222.7)                                | N/A            |

Abbreviations: PY, person years; FU, follow-up; TB, tuberculosis; TST, tuberculin skin test; IGRA, interferon-gamma release assay; HIV, human immunodeficiency virus; N/A, not applicable



**Table S20. Summary of risk of TB per 1000 PY and incidence rate ratios, organized in descending incidence rate ratios. TST results presented for cut-points of  $\geq 5$ mm and  $\geq 10$ mm and IGRA results presented as all types combined. Included populations have a minimum of 2 studies included in the meta-analysis of incidence rate and have a calculable estimate for the incidence rate ratio.**

| <b>Population and Positive Test Definition</b>   | <b>Incidence Rate Ratio<br/>(95% CI)</b> | <b>Incidence Rate per 1000 Person Years<br/>(95% CI)</b> |
|--------------------------------------------------|------------------------------------------|----------------------------------------------------------|
| Immune Suppressing Medications (IGRA Positive)   | 48.1 (5.4 to 430.7)                      | 4.8 (0.1 to 279.2)                                       |
| Prisoners (TST $\geq 10$ mm)                     | 31 (4.1 to 233.9)                        | 45 (9 to 224.6)                                          |
| HIV (TST $\geq 5$ mm)                            | 11.1 (6.2 to 19.9)                       | 27.1 (15 to 49)                                          |
| HIV (IGRA Positive)                              | 11 (4.6 to 26.2)                         | 16.9 (10.5 to 27.3)                                      |
| Recent Immigrant or Refugee (IGRA Positive)      | 10.9 (6.3 to 18.9)                       | 10.7 (8.1 to 14.1)                                       |
| All Contacts (IGRA Positive)                     | 10.8 (6.1 to 19)                         | 17 (12.9 to 22.4)                                        |
| Dialysis (IGRA Positive)                         | 7.0 (0.7 to 67)                          | 3.4 (1.1 to 10.7)                                        |
| Immune Suppressing Medications (TST $\geq 5$ mm) | 6.6 (1.8 to 24.2)                        | 5.4 (1.8 to 16.9)                                        |
| Recent Immigrant or Refugee (TST $\geq 5$ mm)    | 6.4 (2.4 to 16.5)                        | 9.5 (4.3 to 21)                                          |
| All Contacts (TST $\geq 5$ mm)                   | 6 (3.9 to 9.2)                           | 8.4 (5.6 to 12.6)                                        |
| Age <18 Years (TST $\geq 10$ mm)                 | 4.9 (2.7 to 8.8)                         | 0.8 (0.1 to 6.4)                                         |
| Occupational Risk Factor (IGRA Positive)         | 4.9 (0.5 to 48.3)                        | 3 (1.7 to 5.4)                                           |
| All Contacts (TST $\geq 10$ mm)                  | 4.1 (2.6 to 6.4)                         | 9.4 (6.3 to 14.1)                                        |
| Recent Immigrant or Refugee (TST $\geq 10$ mm)   | 4 (2.1 to 7.9)                           | 2.7 (1 to 7.1)                                           |
| Dialysis (TST $\geq 10$ mm)                      | 2.6 (1.4 to 4.8)                         | 100.6 (41.6 to 243.2)                                    |
| Transplant (IGRA Positive)                       | 2.5 (1 to 6)                             | 6.7 (2.2 to 20.4)                                        |
| Transplant (TST $\geq 10$ mm)                    | 2.4 (0.9 to 6.4)                         | 3.7 (0 to 861.5)                                         |
| Age $\geq 65$ Years (TST $\geq 10$ mm)           | 2.2 (0.9 to 5.2)                         | 3.6 (2.1 to 6)                                           |
| Occupational Risk Factor (TST $\geq 10$ mm)      | 1.7 (0.7 to 4.2)                         | 2.8 (1.3 to 6.1)                                         |
| Silicosis (TST $\geq 10$ mm)                     | 1.7 (0.5 to 5.5)                         | 36.9 (28.2 to 48.1)                                      |
| Dialysis (TST $\geq 5$ mm)                       | 1.5 (0.7 to 3.3)                         | 11.8 (0.7 to 200.7)                                      |
| Age $\geq 65$ Years (IGRA Positive)              | 1.3 (0.1 to 14.1)                        | 11.2 (8.3 to 15.1)                                       |
| Transplant (TST $\geq 5$ mm)                     | 0.6 (0.1 to 3)                           | 1 (0 to 64)                                              |
| Occupational Risk Factor (TST $\geq 5$ mm)       | 0.5 (0.1 to 5)                           | 3.6 (1.2 to 11.1)                                        |

\*Studies included are from 2006 onwards only.

SECONDARY ANALYSIS. Table S21 details TB risk among populations with discordant results that were not included in Table 4 of the main text.

Table S21. TB Risk Among Populations with Concordant or Discordant Test Results

| Population                                  | Test Result                   | Number of Cohorts | Number of Individuals | Total PY Follow-up (Mean) | Active TB Events (%)† | TB Rate per 1000 PY (95% CI) | I <sup>2</sup> |
|---------------------------------------------|-------------------------------|-------------------|-----------------------|---------------------------|-----------------------|------------------------------|----------------|
| General Population*                         | TST ≥10mm                     | 3                 | 33,811                | 249,093 (7.4)             | 55 (0.2%)             | 0.3 (0.1 to 1.1)             | 96%            |
| <b>Close and Casual Contacts (Together)</b> |                               |                   |                       |                           |                       |                              |                |
| <i>All Age Groups</i>                       |                               |                   |                       |                           |                       |                              |                |
| Close and Casual Contacts                   | TST ≥10mm, QFT-GIT Positive   | 1                 | 21                    | 75 (3.6)                  | 5 (23.8%)             | 66.7 (27.7 to 160.2)         | N/A            |
| Close and Casual Contacts                   | TST ≥10mm, QFT-GIT Negative   | 2                 | 883                   | 3292 (3.7)                | 12 (1.4%)             | 3.6 (2.1 to 6.4)             | 0%             |
| Close and Casual Contacts                   | TST ≥15mm, QFT-GIT Positive   | 1                 | 17                    | 34 (2.0)                  | 0 (0%)                | 0                            | N/A            |
| Close and Casual Contacts                   | TST ≥15mm, QFT-GIT Negative   | 1                 | 28                    | 56 (2.0)                  | 0 (0%)                | 0                            | N/A            |
| Close and Casual Contacts                   | TST ≥15mm, T-SPOT.TB Positive | 1                 | 21                    | 42 (2.0)                  | 0 (0%)                | 0                            | N/A            |
| Close and Casual Contacts                   | TST ≥15mm, T-SPOT.TB Negative | 1                 | 24                    | 48 (2.0)                  | 0 (0%)                | 0                            | N/A            |
| <i>Age &lt;18 years</i>                     |                               |                   |                       |                           |                       |                              |                |
| Close and Casual Contacts                   | TST ≥10mm, QFT-GIT Positive   | 1                 | 32                    | 64 (2.0)                  | 6 (18.8%)             | 93.8 (42.1 to 208.7)         | N/A            |
| Close and Casual Contacts                   | TST ≥10mm, QFT-GIT Negative   | 1                 | 67                    | 134 (2.0)                 | 0 (0%)                | 0                            | N/A            |
| <b>Close Contacts Only</b>                  |                               |                   |                       |                           |                       |                              |                |
| <i>All Age Groups</i>                       |                               |                   |                       |                           |                       |                              |                |
| Close Contacts Only                         | TST ≥5mm, QFT-GIT Positive    | 1                 | 178                   | 326 (1.8)                 | 5 (2.8%)              | 15.4 (6.4 to 36.9)           | N/A            |
| Close Contacts Only                         | TST ≥5mm, QFT-GIT Negative    | 1                 | 149                   | 273 (1.8)                 | 3 (2.0%)              | 11 (3.5 to 34.1)             | N/A            |
| Close Contacts Only                         | TST ≥5mm, T-SPOT.TB Positive  | 1                 | 181                   | 331 (1.8)                 | 6 (3.3%)              | 18.1 (8.1 to 40.3)           | N/A            |
| Close Contacts Only                         | TST ≥5mm, T-SPOT.TB Negative  | 1                 | 118                   | 216 (1.8)                 | 2 (1.7%)              | 9.3 (2.3 to 37)              | N/A            |
| Close Contacts Only                         | TST ≥10mm, QFT-GIT Positive   | 2                 | 562                   | 1526 (2.7)                | 31 (5.5%)             | 20.3 (14.3 to 28.9)          | 0%             |
| Close Contacts Only                         | TST ≥10mm, QFT-GIT Negative   | 2                 | 226                   | 637 (2.8)                 | 15 (6.6%)             | 23.6 (14.2 to 39.1)          | 0%             |
| Close Contacts Only                         | TST ≥10mm, T-SPOT.TB Positive | 1                 | 10                    | 1 (1.8)                   | 0 (0%)                | 0                            | N/A            |
| Close Contacts Only                         | TST ≥10mm, T-SPOT.TB Negative | 1                 | 16                    | 37 (2.3)                  | 0 (0%)                | 0                            | N/A            |
| Close Contacts Only                         | T-SPOT.TB Positive, TST <10mm | 1                 | 13                    | 27 (2.1)                  | 0 (0%)                | 0                            | N/A            |
| Close Contacts Only                         | QFT-GIT Positive, TST <10mm   | 1                 | 377                   | 757 (2.0)                 | 28 (7.4%)             | 37 (25.5 to 53.6)            | N/A            |
| <i>Age &lt;18 years</i>                     |                               |                   |                       |                           |                       |                              |                |
| Close Contacts Only                         | TST ≥10mm, QFT-GIT Positive   | 1                 | 16                    | 32 (2.0)                  | 5 (31.3%)             | 156.3 (65 to 375.4)          | N/A            |
| Close Contacts Only                         | TST ≥10mm, QFT-GIT Negative   | 1                 | 430                   | 860 (2.0)                 | 3 (0.7%)              | 3.5 (1.1 to 10.8)            | N/A            |
| Close Contacts Only                         | QFT-GIT Positive, TST <10mm   | 1                 | 86                    | 172 (2.0)                 | 1 (1.2%)              | 5.8 (0.8 to 41.3)            | N/A            |
| Close Contacts Only                         | T-SPOT.TB Positive, TST <10mm | 1                 | 26                    | 34 (1.3)                  | 1 (3.8%)              | 29.6 (4.2 to 210)            | N/A            |
| <b>Other Populations</b>                    |                               |                   |                       |                           |                       |                              |                |
| HIV                                         | TST ≥5mm, T-SPOT.TB Positive  | 1                 | 32                    | 95 (3.0)                  | 4 (12.5%)             | 42.1 (15.8 to 112.2)         | N/A            |
| HIV                                         | TST ≥5mm, T-SPOT.TB Negative  | 1                 | 108                   | 321 (3.0)                 | 0 (0%)                | 0                            | N/A            |
| HIV                                         | T-SPOT.TB Positive, TST <5mm  | 1                 | 53                    | 157 (3.0)                 | 0 (0%)                | 0                            | N/A            |
| Transplant                                  | T-SPOT.TB Positive, TST <10mm | 1                 | 71                    | 122 (1.7)                 | 4 (5.6%)              | 32.8 (12.3 to 87.3)          | N/A            |
| Age <5 years                                | TST ≥10mm, QFT-G Negative     | 1                 | 54                    | 308 (5.7)                 | 0 (0%)                | 0                            | N/A            |
| Diabetes                                    | TST ≥10mm, T-SPOT.TB Positive | 1                 | 29                    | 148 (5.1)                 | 0 (0%)                | 0                            | N/A            |

**Table S21. TB Risk Among Populations with Concordant or Discordant Test Results**

| Population                     | Test Result                   | Number of Cohorts | Number of Individuals | Total PY Follow-up (Mean) | Active TB Events (%)† | TB Rate per 1000 PY (95% CI) | I <sup>2</sup> |
|--------------------------------|-------------------------------|-------------------|-----------------------|---------------------------|-----------------------|------------------------------|----------------|
| Immune Suppressing Medications | TST ≥10mm, QFT-GIT Negative   | 2                 | 76                    | 241 (3.2)                 | 2 (2.6%)              | 8.3 (2.1 to 33.2)            | 0%             |
| Immune Suppressing Medications | TST ≥5mm, T-SPOT.TB Negative  | 1                 | 10                    | 12 (1.2)                  | 0 (0%)                | 0                            | N/A            |
| Homeless                       | TST ≥10mm, QFT-GIT Positive   | 1                 | 14                    | 56 (4.0)                  | 3 (21.4%)             | 54 (17.4 to 167.3)           | N/A            |
| Occupational Risk Factor       | TST ≥10mm, QFT-GIT Positive   | 1                 | 838                   | 1327 (1.6)                | 4 (0.5%)              | 3 (1.1 to 8)                 | N/A            |
| Occupational Risk Factor       | TST ≥10mm, QFT-GIT Negative   | 1                 | 1252                  | 1982 (1.6)                | 0 (0%)                | 0                            | N/A            |
| Occupational Risk Factor       | TST ≥10mm, T-SPOT.TB Positive | 1                 | 20                    | 60 (3.0)                  | 1 (5%)                | 16.7 (2.3 to 118.3)          | N/A            |
| Occupational Risk Factor       | QFT-GIT Positive, TST <10mm   | 1                 | 103                   | 163 (1.6)                 | 0 (0%)                | 0                            | N/A            |
| Age <18 years                  | TST ≥10mm, QFT-G Negative     | 1                 | 146                   | 818 (5.6)                 | 0 (0%)                | 0                            | N/A            |
| Age <18 years                  | TST ≥15mm, QFT-GIT Negative   | 1                 | 69                    | 104 (1.5)                 | 0 (0%)                | 0                            | N/A            |

Abbreviations: PY, person years; TB, tuberculosis; TST, tuberculin skin test; QFT-G(IT), QuantiFERON Gold-In-Tube; HIV, human immunodeficiency virus; N/A, not applicable

†The percent represents pooled cumulative incidence estimated from random-effects meta-analysis

SECONDARY ANALYSIS. Tables S22 through S24 detail the results of including all studies, regardless of size, and populations where only a single study was performed.

Table S22. TB Risk Among Populations with TB Exposure

| Population                                              | Positive Test Result Definition | Number of Cohorts | Number of Individuals | Among Test Positive       |                       |                                                    |                | Compared to Test Negative |                                    |                |
|---------------------------------------------------------|---------------------------------|-------------------|-----------------------|---------------------------|-----------------------|----------------------------------------------------|----------------|---------------------------|------------------------------------|----------------|
|                                                         |                                 |                   |                       | Total PY Follow-up (Mean) | Active TB Events (%)† | Random Effects Pooled TB Rate per 1000 PY (95% CI) | I <sup>2</sup> | Number of Studies         | Random Effects Pooled IRR (95% CI) | I <sup>2</sup> |
| General Population*                                     | TST ≥10mm                       | 3                 | 33,811                | 249,093 (7.4)             | 55 (0.2%)             | 0.3 (0.1 to 1.1)                                   | 96%            | -                         | -                                  | -              |
| <b>Close and Casual Contacts (Together)<sup>a</sup></b> |                                 |                   |                       |                           |                       |                                                    |                |                           |                                    |                |
| <i>All Ages</i>                                         |                                 |                   |                       |                           |                       |                                                    |                |                           |                                    |                |
| Close and Casual Contacts                               | QFT-G(IT) Positive              | 7                 | 1478                  | 4319 (2.9)                | 56 (3.8%)             | 14.7 (8.4 to 25.7)                                 | 61%            | 5                         | 10 (5.1 to 19.5)                   | 36%            |
| Close and Casual Contacts                               | T-SPOT.TB Positive              | 2                 | 721                   | 2348 (3.3)                | 33 (4.6%)             | 14.1 (10 to 19.8)                                  | 0%             | 2                         | 7.2 (4.2 to 12.4)                  | 0%             |
| Close and Casual Contacts                               | All IGRA Positive               | 9                 | 2199                  | 6667 (3)                  | 89 (4.0%)             | 13.3 (10.8 to 16.4)                                | 0%             | 7                         | 8.4 (5.2 to 13.5)                  | 19%            |
| Close and Casual Contacts                               | TST ≥5mm                        | 4                 | 7861                  | 32708 (4.2)               | 227 (2.8%)            | 8.4 (4.3 to 16.5)                                  | 95%            | 4                         | 12.5 (6.9 to 22.5)                 | 48%            |
| Close and Casual Contacts                               | TST ≥10mm                       | 5                 | 5728                  | 22561 (3.9)               | 97 (2.6%)             | 9.4 (4 to 21.8)                                    | 93%            | 5                         | 6.9 (3.3 to 14.4)                  | 54%            |
| Close and Casual Contacts                               | TST ≥15mm                       | 1                 | 71                    | 142 (2)                   | 0 (0%)                | 0                                                  | N/A            | 0                         | -                                  | -              |
| <i>Age &lt;5 years</i>                                  |                                 |                   |                       |                           |                       |                                                    |                |                           |                                    |                |
| Close and Casual Contacts                               | TST ≥5mm                        | 1                 | 11                    | 43 (3.9)                  | 2 (18.2%)             | 46.5 (11.6 to 186)                                 | N/A            | 0                         | -                                  | -              |
| <i>Age &lt;18 years</i>                                 |                                 |                   |                       |                           |                       |                                                    |                |                           |                                    |                |
| Close and Casual Contacts                               | QFT-G(IT) Positive              | 1                 | 18                    | 18 (1)                    | 10 (55.6%)            | 555.6 (298.9 to 1032.5)                            | N/A            | 1                         | Not Calculable                     | N/A            |
| Close and Casual Contacts                               | TST ≥5mm                        | 3                 | 1261                  | 3126 (2.5)                | 59 (5.6%)             | 13.2 (2.6 to 66.8)                                 | 94%            | 2                         | 20.1 (2.9 to 140.6)                | 77%            |
| Close and Casual Contacts                               | TST ≥10mm                       | 4                 | 1002                  | 2357 (2.4)                | 69 (7.2%)             | 23.4 (8 to 68.4)                                   | 92%            | 3                         | 21.2 (6.4 to 70.2)                 | 75%            |
| Close and Casual Contacts                               | TST ≥15mm                       | 2                 | 313                   | 840 (2.7)                 | 39 (16.3%)            | 32.6 (5.8 to 182.3)                                | 93%            | 2                         | 40.7 (25.5 to 64.9)                | 0%             |
| <i>Age ≥65 years</i>                                    |                                 |                   |                       |                           |                       |                                                    |                |                           |                                    |                |
| Close and Casual Contacts                               | TST ≥5mm                        | 1                 | 177                   | 692 (3.9)                 | 4 (2.3%)              | 5.8 (2.2 to 15.4)                                  | N/A            | 0                         | -                                  | -              |
| <i>Receiving Immune Suppressing Medications</i>         |                                 |                   |                       |                           |                       |                                                    |                |                           |                                    |                |
| Close and Casual Contacts                               | TST ≥5mm                        | 1                 | 335                   | 2077 (6.2)                | 11 (3.3%)             | 5.3 (2.9 to 9.6)                                   | N/A            | 1                         | 5.2 (1.9 to 14.1)                  | N/A            |
| Close and Casual Contacts                               | TST ≥10mm                       | 1                 | 283                   | 1755 (6.2)                | 10 (3.5%)             | 5.7 (3.1 to 10.6)                                  | N/A            | 1                         | 5.1 (1.9 to 13.3)                  | N/A            |
| Close and Casual Contacts                               | TST ≥15mm                       | 1                 | 170                   | 1054 (6.2)                | 8 (4.7%)              | 7.6 (3.8 to 15.2)                                  | N/A            | 1                         | 5.8 (2.3 to 15.1)                  | N/A            |
| <b>Close Contacts Only<sup>b</sup></b>                  |                                 |                   |                       |                           |                       |                                                    |                |                           |                                    |                |
| <i>All Ages</i>                                         |                                 |                   |                       |                           |                       |                                                    |                |                           |                                    |                |
| Close Contacts Only                                     | QFT-G(IT) Positive              | 6                 | 1426                  | 3524 (2.5)                | 106 (7.3%)            | 30.8 (20.6 to 46.1)                                | 64%            | 5                         | 17.7 (3.3 to 95.6)                 | 87%            |
| Close Contacts Only                                     | T-SPOT.TB Positive              | 1                 | 237                   | 1093 (4.6)                | 8 (3.4%)              | 7.3 (3.7 to 14.6)                                  | N/A            | 1                         | 4.2 (1.4 to 13)                    | N/A            |
| Close Contacts Only                                     | All IGRA Positive               | 7                 | 1663                  | 4617 (2.8)                | 114 (6.5%)            | 22.4 (12.1 to 41.8)                                | 87%            | 6                         | 13.1 (3.3 to 51.9)                 | 70%            |
| Close Contacts Only                                     | TST ≥5mm                        | 9                 | 7626                  | 37696 (4.9)               | 340 (3.8%)            | 10.5 (7.7 to 14.3)                                 | 83%            | 8                         | 3.7 (2.1 to 6.5)                   | 66%            |
| Close Contacts Only                                     | TST ≥10mm                       | 13                | 8849                  | 29970 (3.4)               | 296 (2.7%)            | 10.3 (6.1 to 17.4)                                 | 94%            | 11                        | 2.5 (1.3 to 4.8)                   | 86%            |
| Close Contacts Only                                     | TST ≥15mm                       | 5                 | 2384                  | 9867 (4.1)                | 131 (5.2%)            | 15 (10.9 to 20.7)                                  | 45%            | 4                         | 5.1 (2.1 to 12.2)                  | 83%            |
| <i>Age &lt;5 years</i>                                  |                                 |                   |                       |                           |                       |                                                    |                |                           |                                    |                |
| Close Contacts Only                                     | QFT-G(IT) Positive              | 1                 | 16                    | 28 (1.8)                  | 0 (0%)                | 0                                                  | N/A            | 0                         | -                                  | -              |
| Close Contacts Only                                     | TST ≥10mm                       | 1                 | 23                    | 41 (1.8)                  | 0 (0%)                | 0                                                  | N/A            | 0                         | -                                  | -              |
| <i>Age &lt;18 years</i>                                 |                                 |                   |                       |                           |                       |                                                    |                |                           |                                    |                |
| Close Contacts Only                                     | QFT-G(IT) Positive              | 2                 | 159                   | 305 (1.9)                 | 6 (2.3%)              | 14.5 (1.7 to 120.5)                                | 27%            | 1                         | 13 (4.9 to 34.6)                   | N/A            |

Table S22. TB Risk Among Populations with TB Exposure

| Population                                                  | Positive Test Result Definition | Among Test Positive |                       |                           |                       |                                                    |                | Compared to Test Negative |                                    |                |
|-------------------------------------------------------------|---------------------------------|---------------------|-----------------------|---------------------------|-----------------------|----------------------------------------------------|----------------|---------------------------|------------------------------------|----------------|
|                                                             |                                 | Number of Cohorts   | Number of Individuals | Total PY Follow-up (Mean) | Active TB Events (%)† | Random Effects Pooled TB Rate per 1000 PY (95% CI) | I <sup>2</sup> | Number of Studies         | Random Effects Pooled IRR (95% CI) | I <sup>2</sup> |
| Casual Contacts Only                                        | TST ≥5mm                        | 3                   | 198                   | 355 (1.8)                 | 11 (2.9%)             | 19 (3.9 to 92.2)                                   | 49%            | 1                         | Not Calculable                     | N/A            |
| Casual Contacts Only                                        | TST ≥10mm                       | 5                   | 616                   | 1184 (1.9)                | 18 (2.5%)             | 14.7 (3.9 to 55)                                   | 76%            | 3                         | 4.5 (2 to 10.4)                    | 0%             |
| <b>Casual Contacts Only<sup>c</sup></b>                     |                                 |                     |                       |                           |                       |                                                    |                |                           |                                    |                |
| <i>All Ages</i>                                             |                                 |                     |                       |                           |                       |                                                    |                |                           |                                    |                |
| Casual Contacts Only                                        | QFT-G(IT) Positive              | 1                   | 39                    | 154 (3.9)                 | 2 (5.1%)              | 13 (3.3 to 52)                                     | N/A            | 1                         | Not Calculable                     | N/A            |
| Casual Contacts Only                                        | TST ≥5mm                        | 1                   | 2465                  | 15283 (6.2)               | 21 (0.9%)             | 1.4 (0.9 to 2.1)                                   | N/A            | 1                         | 10.2 (4.7 to 22.4)                 | N/A            |
| Casual Contacts Only                                        | TST ≥10mm                       | 1                   | 1975                  | 12245 (6.2)               | 20 (1%)               | 1.6 (1.1 to 2.5)                                   | N/A            | 1                         | 11.5 (5.4 to 24.5)                 | N/A            |
| Casual Contacts Only                                        | TST ≥15mm                       | 1                   | 1045                  | 6479 (6.2)                | 12 (1.1%)             | 1.9 (1.1 to 3.3)                                   | N/A            | 1                         | 7.8 (3.8 to 16.2)                  | N/A            |
| <i>Age &lt;18 years</i>                                     |                                 |                     |                       |                           |                       |                                                    |                |                           |                                    |                |
| Casual Contacts Only                                        | TST ≥5mm                        | 1                   | 180                   | 180 (1)                   | 0 (0%)                | 0                                                  | N/A            | 0                         | -                                  | -              |
| Casual Contacts Only                                        | TST ≥10mm                       | 1                   | 77                    | 77 (1)                    | 0 (0%)                | 0                                                  | N/A            | 0                         | -                                  | -              |
| <b>All the Above Studies in Contacts Pooled<sup>d</sup></b> |                                 |                     |                       |                           |                       |                                                    |                |                           |                                    |                |
| All Contacts                                                | QFT-G(IT) Positive              | 17                  | 3120                  | 8320 (2.7)                | 180 (5.0%)            | 20.3 (10.6 to 39)                                  | 93%            | 13                        | 14.4 (7.1 to 29.1)                 | 75%            |
| All Contacts                                                | T-SPOT.TB Positive              | 3                   | 958                   | 3441 (3.6)                | 41 (4.3%)             | 11.1 (6.9 to 17.9)                                 | 23%            | 3                         | 6.6 (4 to 10.7)                    | 0%             |
| All Contacts                                                | All IGRA Positive               | 20                  | 4078                  | 11,761 (2.9)              | 221 (4.9)             | 18.1 (10.3 to 31.8)                                | 93%            | 16                        | 11.6 (6.6 to 20.5)                 | 73%            |
| All Contacts                                                | TST ≥5mm                        | 19                  | 19,648                | 90,286 (4.6)              | 615 (2.8%)            | 8.3 (5.5 to 12.5)                                  | 95%            | 16                        | 6 (3.9 to 9.2)                     | 70%            |
| All Contacts                                                | TST ≥10mm                       | 29                  | 18,446                | 69,628 (3.8)              | 462 (2.6%)            | 9.6 (6.4 to 14.3)                                  | 95%            | 23                        | 4.1 (2.6 to 6.5)                   | 81%            |
| All Contacts                                                | TST ≥15mm                       | 9                   | 3932                  | 18,066 (4.6)              | 156 (3.3%)            | 9.1 (5.2 to 16)                                    | 88%            | 16                        | 6.0 (3.9 to 9.2)                   | 70%            |

Abbreviations: PY, person years; TB, tuberculosis; TST, tuberculin skin test; QFT-G(IT), QuantiFERON Gold-In-Tube; QFT, QuantiFERON; IRR, incidence rate ratio; N/A, not applicable

\*Populations are from British Columbia, Canada, Saskatchewan, Canada, and Florida, United States of America.

†The percent represents pooled cumulative incidence estimated from random-effects meta-analysis

<sup>a</sup>Studies were conducted in populations of contacts, with no stratification by intensity of exposure or closeness of contact; <sup>b</sup>Studies were conducted in populations of contacts that were either solely Close Contacts Only or had outcomes reported stratified by close and casual contact; <sup>c</sup>Studies were conducted in populations of contacts that were either solely casual contacts or had outcomes reported stratified by close and casual contact;

<sup>d</sup>Representative of all studies in contacts, regardless of intensity of exposure. All studies included if >100 participants were tested. Participants are not double counted (i.e. we did not pool cohorts coming from the same study for which participants may fall into more than one group, such as the all ages group and the <18 age group, instead we only included the all age group).

Table S23. TB Risk Among Populations with Conditions Affecting Immunity

| Population                                  | Positive Test Result Definition | Among Test Positive |                       |                           |                       |                                                    |                | Compared to Test Negative |                                    |                |
|---------------------------------------------|---------------------------------|---------------------|-----------------------|---------------------------|-----------------------|----------------------------------------------------|----------------|---------------------------|------------------------------------|----------------|
|                                             |                                 | Number of Cohorts   | Number of Individuals | Total PY Follow-up (Mean) | Active TB Events (%)† | Random Effects Pooled TB Rate per 1000 PY (95% CI) | I <sup>2</sup> | Number of Studies         | Random Effects Pooled IRR (95% CI) | I <sup>2</sup> |
| General Population*                         | TST ≥10mm                       | 3                   | 33,811                | 249,093                   | 55                    | 0.3 (0.1 to 1.1)                                   | 96%            | -                         | -                                  | -              |
| Dialysis                                    | QFT-G(IT) Positive              | 5                   | 355                   | 801 (2.3)                 | 4 (1.1%)              | 5 (1.9 to 13.3)                                    | 0%             | 2                         | 8.6 (1 to 77.2)                    | 0%             |
| Dialysis                                    | T-SPOT.TB Positive              | 3                   | 147                   | 220 (1.5)                 | 0 (0.2%)              | 0                                                  | 0%             | 1                         | Not calculable                     | N/A            |
| Dialysis                                    | All IGRA Positive               | 8                   | 502                   | 1021 (2)                  | 4 (0.8%)              | 3.9 (1.5 to 10.4)                                  | 0%             | 3                         | 2.1 (0.2 to 18.2)                  | 42%            |
| Dialysis                                    | TST ≥5mm                        | 2                   | 151                   | 379 (2.5)                 | 10 (2%)               | 11.8 (0.7 to 200.7)                                | 59%            | 1                         | 1.5 (0.7 to 3.3)                   | N/A            |
| Dialysis                                    | TST ≥10mm                       | 5                   | 175                   | 317 (1.8)                 | 20 (11.1%)            | 63.2 (25.5 to 156.7)                               | 68%            | 4                         | 2.5 (1.3 to 4.5)                   | 0%             |
| HIV <sup>a</sup>                            | QFT-G(IT) Positive              | 5                   | 288                   | 857 (3)                   | 16 (5.6%)             | 16.5 (6.7 to 40.4)                                 | 53%            | 3                         | 7 (3 to 16.1)                      | 30%            |
| HIV <sup>b</sup>                            | T-SPOT.TB Positive              | 6                   | 317                   | 868 (2.7)                 | 13 (4.1%)             | 15 (8.7 to 25.8)                                   | 0%             | 4                         | 22.2 (4.3 to 113.5)                | 42%            |
| HIV                                         | All IGRA Positive               | 11                  | 605                   | 1726 (2.9)                | 29 (4.8%)             | 15.7 (9.4 to 26.2)                                 | 29%            | 7                         | 11 (4.6 to 26.2)                   | 45%            |
| HIV <sup>c</sup>                            | TST ≥5mm                        | 10                  | 1310                  | 3807 (2.9)                | 154 (8%)              | 32.2 (16.4 to 63.1)                                | 91%            | 8                         | 11.4 (6.5 to 19.9)                 | 40%            |
| HIV <sup>d†</sup>                           | TST ≥5mm                        | 4                   | 267                   | 745 (2.8)                 | 14 (4.8%)             | 18.5 (2.5 to 136.0)                                | 92%            | 3                         | 12.4 (4.4 to 35.1)                 | 0%             |
| HIV <sup>e</sup>                            | TST ≥10mm                       | 1                   | 69                    | 3807 (2.9)                | 154 (8%)              | 102.6 (55.2 to 190.7)                              | N/A            | 1                         | 14.4 (6.1 to 34.0)                 | N/A            |
| Silicosis                                   | T-SPOT.TB Positive              | 1                   | 151                   | 345 (2.3)                 | 12 (7.9%)             | 34.7 (19.7 to 61.2)                                | N/A            | 1                         | 8.5 (1.1 to 65.4)                  | N/A            |
| Silicosis                                   | TST ≥5mm                        | 1                   | 161                   | 409 (2.5)                 | 9 (5.6%)              | 22 (11.5 to 42.3)                                  | N/A            | 1                         | 1 (0.3 to 3.2)                     | N/A            |
| Silicosis                                   | TST ≥10mm                       | 2                   | 352                   | 1465 (4.2)                | 54 (12.5%)            | 36.9 (28.2 to 48.1)                                | 0%             | 1                         | 1.7 (0.5 to 5.5)                   | N/A            |
| Silicosis                                   | TST ≥15mm                       | 1                   | 89                    | 226 (2.5)                 | 4 (4.5%)              | 17.7 (6.7 to 47.3)                                 | N/A            | 1                         | 0.7 (0.2 to 2.3)                   | N/A            |
| Transplant                                  | QFT-G(IT) Positive              | 7                   | 316                   | 688 (2.2)                 | 5 (1.2%)              | 5.2 (1.1 to 25.4)                                  | 48%            | 4                         | 2.3 (0.8 to 7.2)                   | 0%             |
| Transplant                                  | T-SPOT.TB Positive              | 2                   | 165                   | 305 (1.8)                 | 3 (1.8%)              | 9.9 (3.2 to 30.5)                                  | 0%             | 2                         | 2.7 (0.6 to 12.1)                  | 0%             |
| Transplant                                  | All IGRA Positive               | 9                   | 481                   | 993 (2.1)                 | 8 (1.6%)              | 6.7 (2.2 to 20.4)                                  | 33%            | 6                         | 2.5 (1.0 to 6.0)                   | 0%             |
| Transplant                                  | TST ≥5mm                        | 7                   | 518                   | 1716 (3.3)                | 8 (0.1%)              | 1 (0 to 64)                                        | 64%            | 7                         | 0.6 (0.1 to 3)                     | 30%            |
| Transplant                                  | TST ≥10mm                       | 3                   | 105                   | 215 (2)                   | 5 (0.6%)              | 3.7 (0 to 861.5)                                   | 88%            | 3                         | 2.4 (0.9 to 6.4)                   | 0%             |
| Transplant                                  | TST ≥15mm                       | 1                   | 28                    | 140 (5)                   | 2 (7.1%)              | 14.3 (3.6 to 57.1)                                 | N/A            | 1                         | 5.7 (0.5 to 63)                    | N/A            |
| BMI <18.5 kg/m <sup>2</sup>                 | QFT-G(IT) Positive              | 1                   | 299                   | 578 (1.9)                 | 9 (3%)                | 15.6 (8.1 to 29.9)                                 | N/A            | 0                         | -                                  | -              |
| BMI <18.5 kg/m <sup>2</sup>                 | TST ≥5mm                        | 1                   | 491                   | 1166 (2.4)                | 7 (1.4%)              | 6 (2.9 to 12.6)                                    | N/A            | 1                         | 1.4 (0.5 to 4.5)                   | N/A            |
| BMI <18.5 kg/m <sup>2</sup>                 | TST ≥10mm                       | 1                   | 358                   | 853 (2.4)                 | 7 (2%)                | 8.2 (3.9 to 17.2)                                  | N/A            | 1                         | 2.5 (0.8 to 7.9)                   | N/A            |
| BMI <18.5 kg/m <sup>2</sup>                 | TST ≥15mm                       | 1                   | 199                   | 468 (2.4)                 | 5 (2.5%)              | 10.7 (4.4 to 25.7)                                 | N/A            | 1                         | 3 (0.9 to 9.3)                     | N/A            |
| Smokers¶                                    | QFT-G(IT) Positive              | 1                   | 1547                  | 2991 (1.9)                | 28 (1.8%)             | 9.4 (6.5 to 13.6)                                  | N/A            | 0                         | -                                  | -              |
| Immune Suppressing Medications <sup>f</sup> | QFT-G(IT) Positive              | 2                   | 65                    | 167 (2.6)                 | 4 (2.8%)              | 17.2 (2 to 151.9)                                  | 36%            | 1                         | 48.1 (5.4 to 430.7)                | N/A            |
| Immune Suppressing Medications <sup>g</sup> | T-SPOT.TB Positive              | 2                   | 76                    | 172 (2.3)                 | 0 (0.1%)              | 0                                                  | 0%             | 1                         | Not calculable                     | N/A            |
| Immune Suppressing Medications              | All IGRA Positive               | 4                   | 141                   | 339 (2.4)                 | 4 (0.2%)              | 1.7 (0 to 290.8)                                   | 82%            | 2                         | 4.5 (0.1 to 262.8)                 | 73%            |
| Immune Suppressing Medications <sup>h</sup> | TST ≥5mm                        | 7                   | 234                   | 581 (2.5)                 | 7 (2.6%)              | 10.4 (2.5 to 44.4)                                 | 69%            | 5                         | 6.0 (2.0 to 17.6)                  | 0%             |
| Immune Suppressing Medications <sup>i</sup> | TST ≥10mm                       | 1                   | 16                    | 47 (2.9)                  | 0 (0%)                | 0                                                  | N/A            | 1                         | Not calculable                     | N/A            |
| Diabetes <sup>o</sup>                       | QFT-G(IT) Positive              | 1                   | 272                   | 526 (1.9)                 | 4 (1.5%)              | 7.6 (2.9 to 20.3)                                  | N/A            | 0                         | -                                  | -              |
| Diabetes <sup>a</sup>                       | T-SPOT.TB Positive              | 1                   | 62                    | 316 (5.1)                 | 0 (0%)                | 0                                                  | N/A            | 1                         | Not calculable                     | N/A            |

**Table S23. TB Risk Among Populations with Conditions Affecting Immunity**

| Population            | Positive Test Result Definition | Among Test Positive |                       |                           |                       |                                                    |                | Compared to Test Negative |                                    |                |
|-----------------------|---------------------------------|---------------------|-----------------------|---------------------------|-----------------------|----------------------------------------------------|----------------|---------------------------|------------------------------------|----------------|
|                       |                                 | Number of Cohorts   | Number of Individuals | Total PY Follow-up (Mean) | Active TB Events (%)† | Random Effects Pooled TB Rate per 1000 PY (95% CI) | I <sup>2</sup> | Number of Studies         | Random Effects Pooled IRR (95% CI) | I <sup>2</sup> |
| Diabetes              | All IGRA Positive               | 2                   | 334                   | 842 (2.5)                 | 4 (1.2%)              | 4.4 (0.9 to 22)                                    | 8%             | 1                         | Not Calculable                     | N/A            |
| Diabetes <sup>a</sup> | TST ≥10mm                       | 1                   | 63                    | 526 (1.9)                 | 4 (1.5%)              | 0                                                  | N/A            | 1                         | Not calculable                     | N/A            |
| Age <5 years          | QFT-G(IT) Positive              | 1                   | 206                   | 496 (2.4)                 | 28 (13.6%)            | 56.5 (39 to 81.8)                                  | N/A            | 0                         | -                                  | -              |

Abbreviations: PY, person years; TB, tuberculosis; TST, tuberculin skin test; QFT-G(IT), QuantiFERON Gold-In-Tube; HIV, human immunodeficiency virus; IRR, incidence rate ratio; BMI, body mass index; N/A, not applicable

\*Populations are from British Columbia, Canada, Saskatchewan, Canada, and Florida, United States of America.

†The percent represents pooled cumulative incidence estimated from random-effects meta-analysis

<sup>a</sup>All studies took place in high-income settings from the year 2006 onwards. Four studies reported ARV use. In three studies, ARV use among participants was >50% and in one study 0%. In the three studies that reported mean/median CD4 counts, the counts ranged from 413-483 cells/mm<sup>3</sup>. In the study that did not report ARV use, the authors were contacted and noted ARV use was 71%, as reported in a subsequent publication.<sup>123</sup>

<sup>b</sup>Five of six studies took place in high-income settings from the year 2006 onwards. Five studies reported ARV use. In four studies, ARV use ranged from 40% to 100% and in one study 0%. In the four studies that reported mean/median CD4 counts, the counts ranged from 305 to 578 cells/mm<sup>3</sup>. In the study that did not report ARV use, the authors were contacted and noted ARV use was 71%, as reported in a subsequent publication.<sup>123</sup>

<sup>c</sup>Among the ten studies evaluating TST ≥5mm in PLWH, eight of ten studies took place in high-income settings, with studies beginning between 1990 and 2009. One study was in HIV-positive injection drug users and one study was in HIV-positive homeless persons. Eight of ten studies reported ARV use. Among the six studies beginning from 1990 to 2005, within three studies ARV use was 0%, and within the other three studies ARV use was 40%, 41% and 61%. Among the three studies beginning from 2006 onwards, ARV use was 41%, 76% and not reported. Five studies reported mean/median CD4 counts, the counts ranged from 326 to 547 cells/mm<sup>3</sup>. In one study that did not report ARV use, the authors were contacted and noted ARV use was 71%, as reported in a subsequent publication.<sup>123</sup>

<sup>d</sup>Three of four studies took place in high-income settings from 2006 onwards. One study was in HIV-positive prisoners. Two studies reported ARV use. In one study ARV use was 40% and in the other 0%. In the two studies that reported mean/median CD4 counts, the counts ranged from 483 to 547 cells/mm<sup>3</sup>. In one study that did not report ARV use, the authors were contacted and noted ARV use was 71%, as reported in a subsequent publication.<sup>123</sup>

<sup>e</sup>This study took place in a high-income country from 1990 to 1993. No patients were on ARV and median (IQR) CD4 counts were 390 (280-570) cells/mm<sup>3</sup>.

†Only including studies from 2006 onwards for comparability with IGRA-based estimates.

¶Based on self-reported current smoking in a rural population in China.

<sup>a</sup>Based on self-reported type 2 diabetes in a rural population in China.

<sup>b</sup>Diagnosed patients in a specialist tertiary care hospital. Of the 220 individuals included in the study, 95% had type 2 diabetes, 85% used metformin, and 74% had HbA1c levels >7%.

<sup>c</sup>One study among patients with immune-mediated inflammatory disorders largely receiving anti-tumor necrosis factor- $\alpha$  medications for rheumatoid arthritis, ankylosing spondylitis, psoriasis, and psoriatic arthritis—the most common medications were etanercept and adalimumab. The other study was among patients receiving medications for rheumatoid arthritis—while exact drugs were not reported, 20% were receiving three or more medications and 80% were receiving two or fewer.

<sup>d</sup>One study was among individuals with previous tuberculosis receiving anti-tumor necrosis factor- $\alpha$  medications—the most common medications were infliximab and etanercept. The other study was among patients receiving medications for rheumatoid arthritis—while exact drugs were not reported, 20% were receiving three or more medications and 80% were receiving two or fewer.

<sup>e</sup>One study among rheumatic patients most commonly receiving steroids and who were candidates for biologics. One study among moderate to severe psoriasis patients receiving anti-tumor necrosis factor- $\alpha$  medications—most commonly etanercept and adalimumab. One study among patients receiving medications for rheumatoid arthritis—while exact drugs were not reported, 20% were receiving three or more medications and 80% were receiving two or fewer. One study among rheumatic patients receiving the anti-tumor necrosis factor- $\alpha$  medication infliximab. One study among rheumatoid arthritis patients receiving the steroid prednisone. One study among psoriasis patients receiving anti-tumor necrosis factor- $\alpha$  medications—most commonly etanercept and adalimumab. One study among rheumatic patients receiving anti-tumor necrosis factor- $\alpha$  medications etanercept, infliximab, or adalimumab.

<sup>f</sup>This study was among individuals with previous tuberculosis receiving anti-tumor necrosis factor- $\alpha$  medications—the most common medications were infliximab and etanercept.

**Table S24. TB Risk Among Populations with Characteristics That May Impact Exposure and Immunity**

| Population                                   | Positive Test Result Definition | Number of Cohorts | Number of Individuals | Among Test Positive       |                       |                                                    |  | Compared to Test Negative |                   |                                    |     |
|----------------------------------------------|---------------------------------|-------------------|-----------------------|---------------------------|-----------------------|----------------------------------------------------|--|---------------------------|-------------------|------------------------------------|-----|
|                                              |                                 |                   |                       | Total PY Follow-up (Mean) | Active TB Events (%)† | Random Effects Pooled TB Rate per 1000 PY (95% CI) |  | <i>I</i> <sup>2</sup>     | Number of Studies | Random Effects Pooled IRR (95% CI) |     |
| General Population*                          | TST ≥10mm                       | 3                 | 33,811                | 249,093 (7.4)             | 55 (0.2%)             | 0.3 (0.1 to 1.1)                                   |  | 96%                       | -                 | -                                  | -   |
| Age <18 years                                | QFT-G(IT) Positive              | 1                 | 11                    | 66 (6)                    | 0 (0%)                | 0                                                  |  | N/A                       | 0                 | -                                  | -   |
| Age <18 years                                | TST ≥5mm                        | 1                 | 4820                  | 53443 (11.1)              | 23 (0.5%)             | 0.4 (0.3 to 0.6)                                   |  | N/A                       | 1                 | 3.3 (1.8 to 6)                     | N/A |
| Age <18 years                                | TST ≥10mm                       | 3                 | 5115                  | 30642 (9)                 | 26 (0.5%)             | 1.1 (0 to 37)                                      |  | 99%                       | 1                 | 4.9 (2.7 to 8.8)                   | N/A |
| Age <18 years                                | TST ≥15mm                       | 2                 | 950                   | 6224 (6.6)                | 13 (0.2%)             | 0.8 (0 to 16.1)                                    |  | 63%                       | 1                 | 19 (9.9 to 36.3)                   | N/A |
| Age ≥65 years                                | QFT-G(IT) Positive              | 2                 | 1879                  | 3752 (2)                  | 42 (2.2%)             | 11.2 (8.3 to 15.1)                                 |  | 0%                        | 1                 | 1.3 (0.1 to 14.1)                  | N/A |
| Age ≥65 years                                | TST ≥5mm                        | 1                 | 1684                  | 4583 (2.7)                | 11 (0.7%)             | 2.4 (1.3 to 4.3)                                   |  | N/A                       | 1                 | 1 (0.4 to 2.6)                     | N/A |
| Age ≥65 years                                | TST ≥10mm                       | 2                 | 1376                  | 3938 (2.9)                | 14 (1%)               | 3.6 (2.1 to 6)                                     |  | 0%                        | 2                 | 2.2 (0.9 to 5.2)                   | 0%  |
| Age ≥65 years                                | TST ≥15mm                       | 1                 | 853                   | 2250 (2.6)                | 9 (1.1%)              | 4 (2.1 to 7.7)                                     |  | N/A                       | 1                 | 2.1 (0.9 to 5)                     | N/A |
| Long Term Care                               | QFT-G(IT) Positive              | 1                 | 35                    | 88 (2.5)                  | 0 (0%)                | 0                                                  |  | N/A                       | 0                 | -                                  | -   |
| Long Term Care                               | TST ≥10mm                       | 1                 | 58                    | 145 (2.5)                 | 0 (0%)                | 0                                                  |  | N/A                       | 0                 | -                                  | -   |
| Recent Immigrant or Refugee Arrival          | QFT-G(IT) Positive              | 3                 | 1010                  | 2847 (2.8)                | 29 (2.9%)             | 10.2 (7.1 to 14.7)                                 |  | 0%                        | 3                 | 9 (4.6 to 17.6)                    | 0%  |
| Recent Immigrant or Refugee Arrival          | T-SPOT.TB Positive              | 1                 | 587                   | 1826 (3.1)                | 21 (3.6%)             | 11.5 (7.5 to 17.6)                                 |  | N/A                       | 1                 | 15.7 (5.9 to 41.6)                 | N/A |
| Recent Immigrant or Refugee Arrival          | All IGRA Positive               | 4                 | 1597                  | 4673 (2.9)                | 50 (3.1%)             | 10.7 (8.1 to 14.1)                                 |  | 0%                        | 4                 | 10.9 (6.3 to 18.9)                 | 0%  |
| Recent Immigrant or Refugee Arrival          | TST ≥5mm                        | 3                 | 1853                  | 8132 (3.8)                | 103 (3.5%)            | 11 (5 to 24.2)                                     |  | 88%                       | 2                 | 6.7 (2.5 to 17.8)                  | 0%  |
| Recent Immigrant or Refugee Arrival          | TST ≥10mm                       | 4                 | 10785                 | 103221 (9.6)              | 137 (2.2%)            | 5.1 (1.3 to 19.7)                                  |  | 98%                       | 3                 | 4 (2.1 to 7.7)                     | 17% |
| Recent Immigrant or Refugee Arrival          | TST ≥15mm                       | 2                 | 5609                  | 53796 (10.1)              | 71 (1.3%)             | 2.4 (0.8 to 7.3)                                   |  | 84%                       | 2                 | 3.1 (2.1 to 4.4)                   | 0%  |
| Recent Immigrant or Refugee Arrival (Age<18) | TST ≥10mm                       | 1                 | 44                    | 172 (3.9)                 | 0 (0%)                | 0                                                  |  | N/A                       | 0                 | -                                  | -   |
| Recent Immigrant or Refugee Arrival (BCG)    | TST ≥10mm                       | 1                 | 4970                  | 51191 (10.3)              | 45 (0.9%)             | 0.9 (0.7 to 1.2)                                   |  | N/A                       | 1                 | 2.9 (1.4 to 5.7)                   | N/A |
| Recent Immigrant or Refugee Arrival (BCG)    | TST ≥15mm                       | 1                 | 2954                  | 30426 (10.3)              | 32 (1.1%)             | 1.1 (0.7 to 1.5)                                   |  | N/A                       | 1                 | 2.4 (1.4 to 4.2)                   | N/A |
| Indigenous                                   | TST ≥10mm                       | 1                 | 4904                  | 43425 (8.9)               | 662 (13.5%)           | 15.2 (14.1 to 16.5)                                |  | N/A                       | 0                 | -                                  | -   |
| Homeless                                     | QFT-G(IT) Positive              | 1                 | 27                    | 100 (3.7)                 | 3 (11.1%)             | 30 (9.7 to 93)                                     |  | N/A                       | 1                 | 2.1 (0.4 to 12.8)                  | N/A |
| Homeless                                     | TST ≥10mm                       | 2                 | 657                   | 2395 (3.6)                | 11 (3.2%)             | 8.1 (1.8 to 35.7)                                  |  | 78%                       | 2                 | 4.3 (1.4 to 13.8)                  | 0%  |
| Injection Drug User                          | TST ≥10mm                       | 1                 | 125                   | 259 (2.1)                 | 1 (0.8%)              | 3.9 (0.5 to 27.4)                                  |  | N/A                       | 1                 | 3.7 (0.2 to 59.3)                  | N/A |
| Prisoners                                    | TST ≥5mm                        | 1                 | 486                   | 1639 (3.4)                | 17 (3.5%)             | 10.4 (6.4 to 16.7)                                 |  | N/A                       | 1                 | 2.9 (1.1 to 7.9)                   | N/A |
| Prisoners                                    | TST ≥10mm                       | 3                 | 739                   | 777 (1.1)                 | 21 (6.1%)             | 45 (9 to 224.6)                                    |  | 93%                       | 3                 | 31 (4.1 to 233.9)                  | 0%  |



**Table S24. TB Risk Among Populations with Characteristics That May Impact Exposure and Immunity**

| Population                            | Positive Test Result Definition | Among Test Positive |                       |                           |                       |                                                    |                | Compared to Test Negative |                                    |                |
|---------------------------------------|---------------------------------|---------------------|-----------------------|---------------------------|-----------------------|----------------------------------------------------|----------------|---------------------------|------------------------------------|----------------|
|                                       |                                 | Number of Cohorts   | Number of Individuals | Total PY Follow-up (Mean) | Active TB Events (%)† | Random Effects Pooled TB Rate per 1000 PY (95% CI) | I <sup>2</sup> | Number of Studies         | Random Effects Pooled IRR (95% CI) | I <sup>2</sup> |
| Occupational Risk Factor <sup>a</sup> | QFT-G(IT) Positive              | 6                   | 1366                  | 3345 (2.4)                | 10 (0.6%)             | 3 (1.6 to 5.6)                                     | 0%             | 2                         | 3.6 (0.4 to 34.4)                  | 51%            |
| Occupational Risk Factor <sup>b</sup> | T-SPOT.TB Positive              | 2                   | 101                   | 320 (3.2)                 | 1 (1%)                | 3.1 (0.4 to 22.2)                                  | 0%             | 1                         | Not Calculable                     | N/A            |
| Occupational Risk Factor              | All IGRA Positive               | 8                   | 1467                  | 3665 (2.5)                | 11 (0.7%)             | 3 (1.7 to 5.4)                                     | 0%             | 3                         | 4.9 (0.5 to 48.3)                  | 50%            |
| Occupational Risk Factor <sup>c</sup> | TST ≥5mm                        | 3                   | 401                   | 837 (2.1)                 | 3 (0.7%)              | 3.6 (1.2 to 11.1)                                  | 0%             | 1                         | 0.5 (0.1 to 5)                     | N/A            |
| Occupational Risk Factor <sup>d</sup> | TST ≥10mm                       | 7                   | 2749                  | 5845 (2.1)                | 15 (0.8%)             | 2.9 (1.4 to 5.8)                                   | 28%            | 5                         | 1.8 (0.8 to 4.4)                   | 0%             |
| Occupational Risk Factor <sup>e</sup> | TST ≥15mm                       | 1                   | 104                   | 208 (2)                   | 3 (2.9%)              | 14.4 (4.7 to 44.7)                                 | N/A            | 1                         | 7.5 (0.8 to 71.8)                  | N/A            |

Abbreviations: PY, person years; TB, tuberculosis; TST, tuberculin skin test; QFT-G(IT), QuantiFERON Gold-In-Tube; BCG, Bacillus Calmette-Guérin vaccinated; IRR, incidence rate ratio; N/A, not applicable

<sup>a</sup>Populations are from British Columbia, Canada, Saskatchewan, Canada, and Florida, United States of America.

†The percent represents pooled cumulative incidence estimated from random-effects meta-analysis

<sup>c</sup>Five of the six studies took place in health care workers, with one of these studies following the identification of a smear-positive case in a hospital. The other study was done in coal miners in Germany.

<sup>b</sup>One study was done among health care workers in China, while the other was done among coal miners in Germany.

<sup>c</sup>All three studies took place in health care workers, with one of these studies following the identification of a smear-positive case in a hospital.

<sup>d</sup>All studies took place in health care workers, with one of these studies following the identification of a smear-positive case in a hospital.

<sup>e</sup>The population was student nurse candidates.

## **Supplemental Content S1. Additional Information**

### **Populations Considered At-Risk in This Review, *a priori***

#### *With TB Exposure*

- TB Contacts (both close/household and casual)

#### *With Conditions Affecting Immunity*

- People living with HIV (with or without antiretrovirals)
- Chronic renal failure and/or dialysis-dependent populations
- Diabetes
- Transplant recipients (organ or hematopoietic stem cell)
- Cancer (all types)
- Malnourished (BMI  $\leq 18.5$  kg/m<sup>2</sup>)
- Immune Suppressing Medications (all types, including TNF-alpha, DMARDS, steroids)
- Silicosis
- Smokers
- Alcohol Abusers

#### *With Characteristics Affecting Exposure and Immunocompetency*

- Age (<5 years, <18 years,  $\geq 65$  years)
- Immigrants (including refugees)
- Prisoners
- Injection Drug Users
- Homeless
- Occupational Risk (e.g. healthcare worker)
- Indigenous
- Long Term Care Facilities

### **Classifying Populations into At-Risk Populations**

Populations were classified within their specific at-risk population groups based on author classifications. In most cases, populations were defined based on the title of the article or the specified inclusion criteria within. However, in other studies, mixed populations were included. In these cases, populations were classified as reported in the results and/or tables. In instances where populations could fall into multiple at-risk population groups, we classified populations based on the primary population of interest. For example, if the study population was dialysis patients, we did not classify people who also had diabetes within the diabetes group—all patients in the study were classified as dialysis patients. The one exception to this rule was HIV-coinfection. For example, in a study of people with diabetes, data may have been reported stratified by HIV-coinfection. In this example, people with diabetes and HIV-coinfection were classified as having HIV, while people without HIV-coinfection were classified as having diabetes.

### **Supplemental Information for Tables Included in the Manuscript**

#### **Table 2**

- Among the four studies evaluating QFT-G(IT) in PLWH, all studies took place in high-income settings from the year 2006 onwards. Three studies reported ARV use. ARV use among participants was 53%, 62%, and 76%. In the two studies that reported mean/median CD4 counts, the counts ranged from 413-483 cells/mm<sup>3</sup>. In the study that did not report ARV use, the authors were contacted and noted ARV use was 71%, as reported in a subsequent publication.<sup>123</sup>
- Among the five studies evaluating T-SPOT.TB, all studies took place in high-income settings from the year 2006 onwards. Four studies reported ARV use. ARV use among participants was 40%, 54%, 64%, and 76%. In the three studies that reported mean/median CD4 counts, the counts ranged from 483 to 578 cells/mm<sup>3</sup>. In the study that did not report ARV use, the authors were contacted and noted ARV use was 71%, as reported in a subsequent publication.<sup>123</sup>
- Among the nine studies evaluating TST  $\geq 5$ mm in PLWH, eight of nine studies took place in high-income settings, with studies beginning between 1990 and 2009. One study was in HIV-positive injection drug users and one study was in HIV-positive homeless persons. Eight of nine studies reported ARV use. Among the six studies beginning from 1990 to 2005, within three studies ARV use was 0%, and within the other

three studies ARV use was 40%, 41% and 61%. Among the three studies beginning from 2006 onwards, ARV use was 41%, 76% and not reported. Five studies reported mean/median CD4 counts, the counts ranged from 326 to 547 cells/mm<sup>3</sup>. In the study that did not report ARV use, the authors were contacted and noted ARV use was 71%, as reported in a subsequent publication.<sup>123</sup>

- Expanding on information contained in **Supplemental Table S7**, to assess whether selective treatment of high-risk transplant recipients affected our estimates of risk in the untreated population, the 7 studies and their treatment protocol are summarized for people receiving a transplant who were QFT-G(IT) positive. One study among hematopoietic stem cell transplant recipients, where no one in the study was treated (untreated n=40). One study among immunocompromised populations, of which, unspecified organ transplant recipients were one—no one in the study was treated (untreated n=25). One study among kidney transplant recipients, largely receiving hemodialysis—treatment only given to one person in the study (untreated n=69). One study among kidney transplant recipients where patients with an abnormal chest x-ray received prophylaxis, excluding 12 of 458 people who could be tested (untreated n=95). One study among hematopoietic stem cell transplant recipients where prophylaxis was not guided by test result, rather history of TB contact and radiology, excluding 18 of 409 people who could be tested (untreated n=45). One study of solid organ and/or stem cell transplant recipients where prophylaxis was given to 16 of 300 people who could be tested (untreated n=25). One study of liver transplant recipients where treatment was given to 3 of 20 positive recipients (untreated n=17).
- Expanding on information contained in **Supplemental Table S7**, to assess whether selective treatment of high-risk transplant recipients affected our estimates of risk in the untreated population, the 2 studies and their treatment protocol are summarized for people receiving a transplant who were T-SPOT.TB positive. One study a randomized trial of prophylaxis among kidney or pancreas transplant recipients, patients were randomized to isoniazid or placebo (untreated n=132). One study of solid organ and/or stem cell transplant recipients where prophylaxis was given to 16 of 300 people who could be tested (untreated n=25).
- Expanding on information contained in **Supplemental Table S7**, to assess whether selective treatment of high-risk transplant recipients affected our estimates of risk in the untreated population, the 7 studies and their treatment protocol are summarized for people receiving a transplant who has TST ≥5mm. One study among hematopoietic stem cell transplant recipients, where no one in the study was treated (untreated n=33). One study among liver transplant recipients where prophylaxis was given at the discretion of the attending clinician and 16 of 89 positive patients were treated (untreated n=73). One study among kidney transplant recipients where no patient was treated (untreated n=228). One study among hematopoietic stem cell transplant recipients where prophylaxis was not guided by test result, rather history of TB contact and radiology, excluding 18 of 409 people who could be tested (untreated n=31). One study of solid organ and/or stem cell transplant recipients where prophylaxis was given to 16 of 300 people who could be tested (untreated n=13). One study among lung transplant recipients where prophylaxis was given occasionally and 30 of 70 positive patients were treated (untreated n=40). One study among hematopoietic stem cell transplant recipients where prophylaxis was routinely given to those with TST ≥15mm and 124 of 224 positive patients were treated (untreated n=100).
- Expanding on information contained in **Supplemental Table S7**, to assess whether selective treatment of high-risk transplant recipients affected our estimates of risk in the untreated population, the 3 studies and their treatment protocol are summarized for people receiving a transplant who has TST ≥10mm. One study among hematopoietic stem cell transplant recipients, where no one in the study was treated (untreated n=21). One study among people receiving maintenance hemodialysis and subsequent renal transplant where no treatment was given in the study (untreated n=21). One study among hematopoietic stem cell transplant recipients where prophylaxis was routinely given to those with TST ≥15mm and 124 of 224 positive patients were treated (untreated n=100).
- To understand the patient population and drugs used among the 2 studies in people on immune-suppressing medications who were QFT-G(IT)-positive, we summarized them here. One study among patients with immune-mediated inflammatory disorders largely receiving anti-tumor necrosis factor-α medications for rheumatoid arthritis, ankylosing spondylitis, psoriasis, and psoriatic arthritis—the most common medications were etanercept and adalimumab. The other study was among patients receiving medications for rheumatoid arthritis—while exact drugs were not reported, 20% were receiving three or more medications and 80% were receiving two or fewer.
- To understand the patient population and drugs used among the 3 studies in people on immune-suppressing medications who were IGRA-positive, we summarized them here. One study among patients with immune-mediated inflammatory disorders largely receiving anti-tumor necrosis factor-α medications for rheumatoid arthritis, ankylosing spondylitis, psoriasis, and psoriatic arthritis—the most common medications were etanercept and adalimumab. Two tests were done in the same study among patients receiving medications for rheumatoid arthritis—while exact drugs were not reported, 20% were receiving three or more medications and 80% were receiving two or fewer.
- To understand the patient population and drugs used among the 5 studies in people on immune-suppressing medications who had a TST ≥5mm, we summarized them here. One study among rheumatic patients most commonly receiving steroids and who were candidates for biologics. One study among moderate to severe psoriasis patients receiving anti-tumor necrosis factor-α medications—most commonly etanercept and adalimumab. One study among patients receiving medications for rheumatoid arthritis—while exact drugs were not reported, 20% were receiving three or more medications and 80% were receiving two or fewer. One study among psoriasis patients receiving anti-tumor necrosis factor-α medications—most commonly etanercept and adalimumab. One study among rheumatic patients receiving anti-tumor necrosis factor-α medications etanercept, infliximab, or adalimumab.
- To better describe the setting and patients included in the two studies of IGRA-positive people with diabetes, we summarize them here. One study diagnosed patients in a specialist tertiary care hospital. Of the 220 individuals included in the study, 95% had type 2 diabetes, 85% used metformin, and 74% had HbA1c levels >7%. Another study was based on self-reported type 2 diabetes in a rural population in China.

**Table 3**

- Among the studies using QFT-G(IT) or TST ≥5mm in Recent Immigrant or refugee arrivals, one study was among asylum seekers in Norway. One study was among immigrants, largely from South Asia, to England. One study was among immigrants arriving in the last five years from countries with an annual TB incidence ≥40 per 100,000 to the United Kingdom.
- Among the studies using any IGRA test in Recent Immigrant or refugee arrivals, all three QFT-G(IT) studies above were included, as well as T-SPOT.TB results from a study in the United Kingdom.
- Among the studies using TST ≥10mm in Recent Immigrant or refugee arrivals, one study was among predominantly Southeast Asian refugees in Australia. One study was among immigrants to Saskatchewan, Canada, normally screened at entry. One study was among immigrants arriving in the last five years from countries with an annual TB incidence ≥40 per 100,000 to the United Kingdom.
- Among the studies using TST ≥15mm in Recent Immigrant or refugee arrivals, one study was among predominantly Southeast Asian refugees in Australia. One study was among asylum seekers in Norway.
- Among studies of people with an occupational risk factor using QFT-G(IT), five of the six studies took place in health care workers, with one of these studies following the identification of a smear-positive case in a hospital. The other study was done in coal miners in Germany.
- Among studies of people with an occupational risk factor using T-SPOT.TB, one study was done among health care workers in China, while the other was done among coal miners in Germany.
- Among studies of people with an occupational risk factor using TST ≥5mm, all three studies took place in health care workers, with one of these studies following the identification of a smear-positive case in a hospital.

- Among studies of people with an occupational risk factor using TST  $\geq 10$ mm, all three studies took place in health care workers, with one of these studies following the identification of a smear-positive case in a hospital.

## **References**

1. Cook VJ, Hernández-Garduño E, Elwood RK. Risk of tuberculosis in screened subjects without known risk factors for active disease. *Int J Tuberc Lung Dis*. 2008;12(8):903-908.
2. Horsburgh CR, O'Donnell M, Chamblee S, et al. Revisiting rates of reactivation tuberculosis: a population-based approach. *Am J Respir Crit Care Med*. 2010;182(3):420-425.
3. Ward H, Stewart S, Al-Azem A, Reeder B, Hoepfner V. Quantifying local TB risk factors and determining the relative cost of treatment of latent TB infection to prevent tuberculosis. *Canadian Journal of Respiratory, Critical Care, and Sleep Medicine*. 2017;1(4):191-198.
4. Abubakar I, Drobniowski F, Southern J, et al. Prognostic value of interferon- $\gamma$  release assays and tuberculin skin test in predicting the development of active tuberculosis (UK PREDICT TB): a prospective cohort study. *The Lancet Infectious Diseases*. 2018;18(10):1077-1087.
5. Agarwal SK, Gupta S, Bhowmik D, Mahajan S. Tuberculin skin test for the diagnosis of latent tuberculosis during renal replacement therapy in an endemic area: A single center study. *Indian Journal of Nephrology*. 2010;20(3):132-136.
6. Aichelburg MC, Reiberger T, Breitenacker F, Mandorfer M, Makrathathis A, Rieger A. Reversion and conversion of interferon- release assay results in HIV-1-infected individuals. *Journal of Infectious Diseases*. 2014;209(5):729-733.
7. Aki SZ, Sucak GT, Tunccan OG, Kokturk N, Senol E. The incidence of tuberculosis infection in hematopoietic stem cell transplantation recipients: A retrospective cohort study from a center in Turkey. *Transpl Infect Dis*. 2018;20(4):e12912.
8. Al Kubaisy W, Al Dulayme A, Hashim DS. Active tuberculosis among Iraqi schoolchildren with positive skin tests and their household contacts. *Eastern Mediterranean Health Journal*. 2003;9(4):675-688.
9. Altet N, Dominguez J, Souza-Galvao ML, et al. Predicting the Development of Tuberculosis with the Tuberculin Skin Test and QuantiFERON Testing. *Annals of the American Thoracic Society*. 2015;12(5):680-688.
10. Anger HA, Proops D, Harris TG, et al. Active case finding and prevention of tuberculosis among a cohort of contacts exposed to infectious tuberculosis cases in New York City. *Clinical Infectious Diseases*. 2012;54(9):1287-1295.
11. Arroyave L, Keynan Y, Lopez L, Marin D, Arbelaez MP, Rueda ZV. Negative latent tuberculosis at time of incarceration: identifying a very high-risk group for infection. *Epidemiology and Infection*. 2017;145(12):2491-2499.
12. Bakir M, Millington KA, Soysal A, et al. Prognostic value of a T-cell-based, interferon-gamma biomarker in children with tuberculosis contact. *Annals of Internal Medicine*. 2008;149(11):777-787.
13. Baliashvili D, Kempker RR, Blumberg HM, et al. A population-based tuberculosis contact investigation in the country of Georgia. *Public Health Action*. 2018;8(3):110-117.
14. Benito N, Sued O, Moreno A, et al. Diagnosis and treatment of latent tuberculosis infection in liver transplant recipients in an endemic area. *Transplantation*. 2002;74(10):1381-1386.
15. Bergot E, Haustraete E, Malbruny B, Magnier R, Salaun MA, Zalcman G. Observational study of QuantiFERON-TB gold in-tube assay in tuberculosis contacts in a low incidence area. *PLoS ONE*. 2012;7(8):e43520.
16. Bourgarit A, Baron G, Breton G, et al. Latent Tuberculosis Infection Screening and 2-Year Outcome in Antiretroviral-Naive HIV-Infected Patients in a Low-Prevalence Country.[Erratum appears in Ann Am Thorac Soc. 2016 Apr;13(4):576; PMID: 27058191]. *Annals of the American Thoracic Society*. 2015;12(8):1138-1145.

17. Bradshaw L, Davies E, Devine M, et al. The role of the interferon gamma release assay in assessing recent tuberculosis transmission in a hospital incident. *PLoS ONE*. 2011;6(6):e20770.
18. Cailleaux-Cezar M, de AMD, Xavier GM, et al. Tuberculosis incidence among contacts of active pulmonary tuberculosis. *International Journal of Tuberculosis and Lung Disease*. 2009;13(2):190-195.
19. Chakhaia T, Magee MJ, Kempker RR, et al. High utility of contact investigation for latent and active tuberculosis case detection among the contacts: a retrospective cohort study in Tbilisi, Georgia, 2010-2011. *PLoS ONE*. 2014;9(11):e111773.
20. Chang B, Park HY, Jeon K, et al. Interferon-gamma release assay in the diagnosis of latent tuberculosis infection in arthritis patients treated with tumor necrosis factor antagonists in Korea. *Clin Rheumatol*. 2011;30(12):1535-1541.
21. Chan-Yeung M, Dai DL, Cheung AH, et al. Tuberculin skin test reaction and body mass index in old age home residents in Hong Kong. *Journal of the American Geriatrics Society*. 2007;55(10):1592-1597.
22. Chee CBE, Teaman MD, Boudville IC, Do SE, Wang YT. Treatment of latent TB infection for Close Contacts Only as a complementary TB control strategy in Singapore. *International Journal of Tuberculosis and Lung Disease*. 2004;8(2):226-231.
23. Chigbu LN, Iroegbu CU. Incidence and spread of Mycobacterium tuberculosis-associated infection among Aba Federal prison inmates in Nigeria. *Journal of Health, Population & Nutrition*. 2010;28(4):327-332.
24. Christopoulos AI, Diamantopoulos AA, Dimopoulos PA, Goumenos DS, Barbalias GA. Risk factors for tuberculosis in dialysis patients: a prospective multi-center clinical trial. *BMC Nephrol*. 2009;10:36.
25. Chung WK, Zheng ZL, Kim HS, et al. Serial testing of interferon-gamma-release assays for the diagnosis of latent tuberculosis in hemodialysis patients. *J Infect*. 2010;61(2):144-149.
26. Daley CL, Hahn JA, Moss AR, Hopewell PC, Schecter GF. Incidence of tuberculosis in injection drug users in San Francisco: impact of anergy. *American Journal of Respiratory and Critical Care Medicine*. 1998;157(1):19-22.
27. Denholm JT, Leslie DE, Jenkin GA, et al. Long-term follow-up of contacts exposed to multidrug-resistant tuberculosis in Victoria, Australia, 1995-2010. *International Journal of Tuberculosis and Lung Disease*. 2012;16(10):1320-1325.
28. Diel R, Loddenkemper R, Niemann S, Meywald-Walter K, Nienhaus A. Negative and positive predictive value of a whole-blood interferon-gamma release assay for developing active tuberculosis: An update. *American Journal of Respiratory and Critical Care Medicine*. 2011;183(1):88-95.
29. Dobler CC, Marks GB. Risk of tuberculosis among contacts in a low-incidence setting. *European Respiratory Journal*. 2013;41(6):1459-1461.
30. Dogan E, Erkok R, Sayarlioglu H, Uzun K. Tuberculin Skin Test Results and the Booster Phenomenon in Two-Step Tuberculin Skin Testing in Hemodialysis Patients. *Renal Failure*. 2009;27(4):425-428.
31. Edathodu J, Varghese B, Alrajhi AA, et al. Diagnostic potential of interferon-gamma release assay to detect latent tuberculosis infection in kidney transplant recipients. *Transplant Infectious Disease*. 2017;19(2).
32. Elliot C, Marais B, Williams P, et al. Tuberculin skin test versus interferon-gamma release assay in refugee children: A retrospective cohort study. *J Paediatr Child Health*. 2018;54(8):834-839.
33. Elzi L, Schlegel M, Weber R, et al. Reducing tuberculosis incidence by tuberculin skin testing, preventive treatment, and antiretroviral therapy in an area of low tuberculosis transmission. *Clinical Infectious Diseases*. 2007;44(1):94-102.

34. Espinal MA, Peréz EN, Baéz J, et al. Infectiousness of Mycobacterium tuberculosis in HIV-1-infected patients with tuberculosis: a prospective study. *Lancet*. 2000;355(9200):275-280.
35. Fang H-C, Chou K-J, Chen C-L, et al. Tuberculin skin test and anergy in dialysis patients of a tuberculosis-endemic area. *Nephron*. 2002;91(4):682-687.
36. Fournier A, Antoun F, Charlois Ou C, et al. [Longitudinal follow-up of contact subjects of cases of tuberculosis in Paris]. *Revue des Maladies Respiratoires*. 2015;32(7):705-714.
37. Franken WPJ, Arend SM, Thijsen SFT, et al. Interferon-gamma release assays during follow-up of tuberculin skin test-positive contacts. *International Journal of Tuberculosis and Lung Disease*. 2008;12(11):1286-1294.
38. Gao L, Li X, Liu J, et al. Incidence of active tuberculosis in individuals with latent tuberculosis infection in rural China: follow-up results of a population-based, multicentre, prospective cohort study. *The Lancet Infectious Diseases*. 2017;17(10):1053-1061.
39. Garie KT, Yassin MA, Cuevas LE. Lack of adherence to isoniazid chemoprophylaxis in children in contact with adults with Tuberculosis in Southern Ethiopia. *PLoS ONE*. 2011;6(11):e26452.
40. Girardi E, Antonucci G, Ippolito G, et al. Association of tuberculosis risk with the degree of tuberculin reaction in HIV-infected patients. The Gruppo Italiano di Studio Tubercolosi e AIDS. *Archives of Internal Medicine*. 1997;157(7):797-800.
41. Golub JE, Cohn S, Saraceni V, et al. Long-term protection from isoniazid preventive therapy for tuberculosis in HIV-infected patients in a medium-burden tuberculosis setting: the TB/HIV in Rio (THRio) study. *Clinical Infectious Diseases*. 2015;60(4):639-645.
42. Gómez-Reino JJ, Carmona L, Angel Descalzo M, Biobadaser Group. Risk of tuberculosis in patients treated with tumor necrosis factor antagonists due to incomplete prevention of reactivation of latent infection. *Arthritis Rheum*. 2007;57(5):756-761.
43. Grinsdale JA, Islam S, Tran OC, Ho CS, Masae Kawamura L, Higashi JM. Interferon-gamma release assays and pediatric public health tuberculosis screening: The San Francisco program experience 2005 to 2008. *Journal of the Pediatric Infectious Diseases Society*. 2016;5(2):123-130.
44. Guirao-Arrabal E, Santos F, Redel-Montero J, et al. Risk of tuberculosis after lung transplantation: the value of pretransplant chest computed tomography and the impact of mTOR inhibitors and azathioprine use. *Transplant Infectious Disease*. 2016;18(4):512-519.
45. Haldar P, Thuraisingam H, Patel H, et al. Single-step QuantiFERON screening of adult contacts: a prospective cohort study of tuberculosis risk. *Thorax*. 2013;68(3):240-246.
46. Hand J, Sigel K, Huprikar S, Hamula C, Rana M. Tuberculosis after liver transplantation in a large center in New York City: QuantiFERON-TB Gold-based pre-transplant screening performance and active tuberculosis post-transplant. *Transplant Infectious Disease*. 2018;20(2):12845.
47. Harstad I, Winje BA, Heldal E, Oftung F, Jacobsen GW. Predictive values of QuantiFERON-TB Gold testing in screening for tuberculosis disease in asylum seekers. *International Journal of Tuberculosis and Lung Disease*. 2010;14(9):1209-1211.
48. Hemmati M, Ghadiri K, Rezaei M. Tuberculin reactivity in school Age children; five-year follow-up in Iran. *Iranian Journal of Pediatrics*. 2011;21(1):39-44.
49. Higuchi K, Kondo S, Wada M, et al. Contact investigation in a primary school using a whole blood interferon-gamma assay. *Journal of Infection*. 2009;58(5):352-357.
50. Hill PC, Brookes RH, Fox A, et al. Longitudinal assessment of an ELISPOT test for Mycobacterium tuberculosis infection. *PLoS Medicine*. 2007;4(6):e192.
51. Huang SF, Chen MH, Wang FD, Tsai CY, Fung CP, Su WJ. Efficacy of isoniazid salvage therapy for latent tuberculosis infection in patients with immune-mediated inflammatory disorders - A retrospective cohort study in Taiwan. *Journal of Microbiology, Immunology and Infection*. 2018;51(6):784-793.

52. Huerga H, Sanchez-Padilla E, Melikyan N, et al. High prevalence of infection and low incidence of disease in child contacts of patients with drug-resistant tuberculosis: A prospective cohort study. *Arch Dis Child*. 2019;104:622-628.
53. Jambaldorj E, Han M, Jeong JC, et al. Poor predictability of QuantiFERON-TB assay in recipients and donors for tuberculosis development after kidney transplantation in an intermediate-TB-burden country. *BMC Nephrology*. 2017;18(88).
54. Jeyakumar D. Tuberculin reactivity and subsequent development of tuberculosis in a cohort of student nurses. *Medical Journal of Malaysia*. 1999;54(4):492-495.
55. Jo KW, Hong Y, Jung YJ, et al. Incidence of tuberculosis among anti-tumor necrosis factor users in patients with a previous history of tuberculosis. *Respiratory Medicine*. 2013;107(11):1797-1802.
56. Joshi R, Narang U, Zwerling A, et al. Predictive value of latent tuberculosis tests in Indian healthcare workers: a cohort study. *European Respiratory Journal*. 2011;38(6):1475-1477.
57. Jung JY, Joo DJ, Lee CH, et al. Pre-transplant risk factors for tuberculosis after kidney transplant in an intermediate burden area. *International Journal of Tuberculosis and Lung Disease*. 2012;16(2):248-254.
58. Kik SV, Franken WP, Mensen M, et al. Predictive value for progression to tuberculosis by IGRA and TST in immigrant contacts. *European Respiratory Journal*. 2010;35(6):1346-1353.
59. Kim JH, Won S, Choi CB, Sung YK, Song GG, Bae SC. Evaluation of the usefulness of interferon-gamma release assays and the tuberculin skin test for the detection of latent Mycobacterium tuberculosis infections in Korean rheumatic patients who are candidates for biologic agents. *International Journal of Rheumatic Diseases*. 2015;18(3):315-322.
60. Kim YJ, Chi YH, Lee JY, et al. In-hospital contact investigation among health care workers after exposure to pulmonary tuberculosis in an intermediate tuberculosis prevalence area: A prospective study. *Archives of Environmental and Occupational Health*. 2017;72(5):272-278.
61. Kim SH, Lee SO, Park IA, et al. Isoniazid treatment to prevent TB in kidney and pancreas transplant recipients based on an interferon-gamma-releasing assay: an exploratory randomized controlled trial. *Journal of Antimicrobial Chemotherapy*. 2015;70(5):1567-1572.
62. Kim SH, Lee SO, Park JB, et al. A prospective longitudinal study evaluating the usefulness of a T-cell-based assay for latent tuberculosis infection in kidney transplant recipients. *American Journal of Transplantation*. 2011;11(9):1927-1935.
63. Kim HJ, Lee GH, Ryoo S, et al. Role of confirmatory interferon-gamma release assays in school outbreaks of tuberculosis in South Korea. *International Journal of Tuberculosis and Lung Disease*. 2015;19(5):576-581.
64. Kruczak K, Duplaga M, Sanak M, et al. Comparison of IGRA tests and TST in the diagnosis of latent tuberculosis infection and predicting tuberculosis in risk groups in Krakow, Poland. *Scandinavian Journal of Infectious Diseases*. 2014;46(9):649-655.
65. Laffitte E, Janssens JP, Roux-Lombard P, et al. Tuberculosis screening in patients with psoriasis before antitumor necrosis factor therapy: comparison of an interferon-gamma release assay vs. tuberculin skin test. *Br J Dermatol*. 2009;161(4):797-800.
66. Lange B, Vavra M, Kern WV, Wagner D. Development of tuberculosis in immunocompromised patients with a positive tuberculosis-specific IGRA. *International Journal of Tuberculosis and Lung Disease*. 2012;16(4):492-495.
67. Lee SH, Yim JJ, Kim HJ, et al. Adverse events and development of tuberculosis after 4 months of rifampicin prophylaxis in a tuberculosis outbreak. *Epidemiology and Infection*. 2012;140(6):1028-1035.
68. Lee YM, Lee SO, Choi SH, et al. A prospective longitudinal study evaluating the usefulness of the interferon-gamma releasing assay for predicting active tuberculosis in allogeneic hematopoietic stem cell transplant recipients. *Journal of Infection*. 2014;69(2):165-173.



69. Lee H, Park HY, Jeon K, et al. QuantiFERON-TB gold in-tube assay for screening arthritis patients for latent tuberculosis infection before starting anti-tumor necrosis factor treatment. *PLoS ONE*. 2015;10(3):e0119260.
70. Lee S, Lee JE, Kang JS, Lee SO, Lee SH. Long-term performance of the IGRA to predict and prevent active tuberculosis development in HIV-infected patients. *Int J Tuberc Lung Dis*. 2019;23(4):422-427.
71. Lee SS, Lin HH, Tsai HC, et al. A Clinical Algorithm to Identify HIV Patients at High Risk for Incident Active Tuberculosis: A Prospective 5-Year Cohort Study. *PLoS ONE*. 2015;10(8):e0135801.
72. Lee SS, Chou KJ, Su IJ, et al. High prevalence of latent tuberculosis infection in patients in end-stage renal disease on hemodialysis: Comparison of QuantiFERON-TB GOLD, ELISPOT, and tuberculin skin test. *Infection*. 2009;37(2):96-102.
73. Leow MK, Dalan R, Chee C, et al. Latent Tuberculosis in Patients with Diabetes Mellitus: Prevalence, Progression and Public Health Implications. *Experimental and Clinical Endocrinology & Diabetes*. 2014;122(9):528-532.
74. Leung CC, Yew WW, Law WS, et al. Smoking and tuberculosis among silicotic patients. *European Respiratory Journal*. 2007;29(4):745-750.
75. Leung CC, Yew WW, Au KF, et al. A strong tuberculin reaction in primary school children predicts tuberculosis in adolescence. *Pediatric Infectious Disease Journal*. 2012;31(2):150-153.
76. Leung CC, Yam WC, Ho PL, et al. T-Spot.TB outperforms tuberculin skin test in predicting development of active tuberculosis among household contacts. *Respirology*. 2015;20(3):496-503.
77. Leung CC, Yam WC, Yew WW, et al. T-Spot.TB outperforms tuberculin skin test in predicting tuberculosis disease. *American Journal of Respiratory and Critical Care Medicine*. 2010;182(6):834-840.
78. Lienhardt C, Fielding K, Hane AA, et al. Evaluation of the prognostic value of IFN-gamma release assay and tuberculin skin test in household contacts of infectious tuberculosis cases in Senegal.[Erratum appears in PLoS One. 2010;5(12) doi: 10.1371/annotation/6aa24f81-7f3a-4163-b8bc-731c6112fcf7 Note: Diadhiou, Roger [corrected to Diadhiou, Raymond]]. *PLoS ONE*. 2010;5(5):e10508.
79. Ling DL, Liaw YP, Lee CY, Lo HY, Yang HL, Chan PC. Contact investigation for tuberculosis in Taiwan contacts aged under 20 years in 2005. *International Journal of Tuberculosis and Lung Disease*. 2011;15(1):50-55.
80. Luabeya KK, Tameris MD, Geldenhuys HD, et al. Risk of Disease After Isoniazid Preventive Therapy for Mycobacterium tuberculosis Exposure in Young HIV-uninfected Children. *Pediatric Infectious Disease Journal*. 2015;34(11):1218-1222.
81. Marks GB, Bai J, Simpson SE, Sullivan EA, Stewart GJ. Incidence of tuberculosis among a cohort of tuberculin-positive refugees in Australia: reappraising the estimates of risk. *American Journal of Respiratory and Critical Care Medicine*. 2000;162(5):1851-1854.
82. Martin V, Guerra JM, Cayla JA, Rodriguez JC, Blanco MD, Alcoba M. Incidence of tuberculosis and the importance of treatment of latent tuberculosis infection in a Spanish prison population. *International Journal of Tuberculosis and Lung Disease*. 2001;5(10):926-932.
83. Martinez-Pino I, Sambeat MA, Lacalle-Remigio JR, Domingo P, Group VCS. Incidence of tuberculosis in HIV-infected patients in Spain: the impact of treatment for LTBI. *International Journal of Tuberculosis and Lung Disease*. 2013;17(12):1545-1551.
84. Mazahir R, Beig FK, Ahmed Z, Alam S. Burden of tuberculosis among household children of adult multi drug resistant patients and their response to first line anti tubercular drugs. *Egyptian Pediatric Association Gazette*. 2017;65(4):122-126.

85. Metin Timur O, Tanir G, Oz FN, Bayhan GI, Aydin Teke T, Tuygun N. Comparison of QuantiFERON-TB gold in-tube test with tuberculin skin test in children who had no contact with active tuberculosis case Aktif tuberkulozlu birey ile temasi{dotless} olmayan cocuklarda QuantiFERON-TB gold in-tube test ile tuberkulin cilt testinin karsi{dotless}lasti{dotless}ri{dotless}lmasi{dotless} Giris. *Tuberkuloz ve Toraks*. 2014;62(2):116-121.
86. Moon SM, Lee SO, Choi SH, et al. Comparison of the QuantiFERON-TB Gold In-Tube test with the tuberculin skin test for detecting latent tuberculosis infection prior to hematopoietic stem cell transplantation. *Transplant Infectious Disease*. 2013;15(1):104-109.
87. Moran-Mendoza O, Marion SA, Elwood K, Patrick DM, FitzGerald JM. Tuberculin skin test size and risk of tuberculosis development: a large population-based study in contacts. *International Journal of Tuberculosis and Lung Disease*. 2007;11(9):1014-1020.
88. Moss AR, Hahn JA, Tulskey JP, Daley CL, Small PM, Hopewell PC. Tuberculosis in the homeless. A prospective study. *Am J Respir Crit Care Med*. 2000;162(2 Pt 1):460-464.
89. Moyo N, Tay EL, Denholm JT. Evaluation of tuberculin skin testing in tuberculosis contacts in Victoria, Australia, 2005-2013. *Public Health Action*. 2015;5(3):188-193.
90. Noorbakhsh S, Mousavi J, Barati M, et al. Evaluation of an interferon-gamma release assay in young contacts of active tuberculosis cases. *East Mediterr Health J*. 2011;17(9):714-718.
91. Ozgen AA, Ozbilgin M, Abdulleyeva M, et al. Determinants and characteristics of tuberculosis in liver transplant recipients. *Turk J Med Sci*. 2018;48:1162-1166.
92. Pai M, Joshi R, Dogra S, et al. T-cell assay conversions and reversions among household contacts of tuberculosis patients in rural India. *Int J Tuberc Lung Dis*. 2009;13(1):84-92.
93. Pullar ND, Steinum H, Bruun JN, Dyrhol-Riise AM. HIV patients with latent tuberculosis living in a low-endemic country do not develop active disease during a 2 year follow-up; a Norwegian prospective multicenter study. *BMC Infectious Diseases*. 2014;14:667.
94. Rakotosamimanana N, Richard V, Raharimanga V, et al. Biomarkers for risk of developing active tuberculosis in contacts of TB patients: A prospective cohort study. *European Respiratory Journal*. 2015;46(4):1095-1103.
95. Ringshausen FC, Nienhaus A, Schablon A, et al. Frequent detection of latent tuberculosis infection among aged underground hard coal miners in the absence of recent tuberculosis exposure. *PLoS ONE*. 2013;8(12):e82005.
96. Ringshausen FC, Schlosser S, Nienhaus A, Schablon A, Schultze-Werninghaus G, Rohde G. In-hospital contact investigation among health care workers after exposure to smear-negative tuberculosis. *Journal of Occupational Medicine and Toxicology*. 2009;4(11).
97. Ringshausen FC, Nienhaus A, Schablon A, Schlosser S, Schultze-Werninghaus G, Rohde G. Predictors of persistently positive Mycobacterium-tuberculosis-specific interferon-gamma responses in the serial testing of health care workers. *BMC Infectious Diseases*. 2010;10:220.
98. Rueda ZV, Arroyave L, Marin D, et al. High prevalence and risk factors associated with latent tuberculous infection in two Colombian prisons. *International Journal of Tuberculosis and Lung Disease*. 2014;18(10):1166-1171.
99. Sanchez-Moya AI, Garcia-Doval I, Carretero G, et al. Latent tuberculosis infection and active tuberculosis in patients with psoriasis: A study on the incidence of tuberculosis and the prevalence of latent tuberculosis disease in patients with moderate-severe psoriasis in Spain. BIOBADADERM registry. *Journal of the European Academy of Dermatology and Venereology*. 2012;27(11):1366-1374.
100. Saunders MJ, Wingfield T, Tovar MA, et al. A score to predict and stratify risk of tuberculosis in adult contacts of tuberculosis index cases: a prospective derivation and external validation cohort study. *The Lancet Infectious Diseases*. 2017;17(11):1190-1199.
101. Schablon A, Nienhaus A, Ringshausen FC, Preisser AM, Peters C. Occupational screening for tuberculosis and the use of a borderline zone for interpretation of the IGRA in German healthcare workers.[Erratum appears in PLoS One. 2015;10(11):e0142541; PMID: 26540199]. *PLoS ONE*. 2014;9(12):e115322.

102. Sester M, Leth F, Bruchfeld J, et al. Risk assessment of tuberculosis in immunocompromised patients. A TBNET study. *American Journal of Respiratory and Critical Care Medicine*. 2014;190(10):1168-1176.
103. Sharma SK, Vashishtha R, Chauhan LS, Sreenivas V, Seth D. Comparison of TST and IGRA in Diagnosis of Latent Tuberculosis Infection in a High TB-Burden Setting. *PLoS ONE*. 2017;12(1):e0169539.
104. Shu CC, Hsu CL, Wei YF, et al. Risk of Tuberculosis Among Patients on Dialysis: The Predictive Value of Serial Interferon-Gamma Release Assay. *Medicine*. 2016;95(22):e3813.
105. Shu CC, Wu VC, Yang FJ, et al. Dynamic changes in positive interferon-gamma release assay in a dialysis population: An observational cohort study. *J Infect*. 2013;67(6):529-535.
106. Silva BD, Tannus-Silva DG, Rabahi MF, Kipnis A, Junqueira-Kipnis AP. The use of Mycobacterium tuberculosis HspX and GlcB proteins to identify latent tuberculosis in rheumatoid arthritis patients. *Memorias do Instituto Oswaldo Cruz*. 2014;109(1):29-37.
107. Singh J, Sankar MM, Kumar S, et al. Incidence and Prevalence of Tuberculosis among Household Contacts of Pulmonary Tuberculosis Patients in a Peri-Urban Population of South Delhi, India. *PLoS ONE*. 2013;8(7):e69730.
108. Snast I, Bercovici E, Avni T, Shitenberg D, Hodak E, Pavlovsky L. Tuberculosis screening in patients with psoriasis receiving biologic therapy: A retrospective cohort study. *Acta Derm Venereol*. 2018;98(10):979-980.
109. Song SE, Yang J, Lee KS, et al. Comparison of the tuberculin skin test and interferon gamma release assay for the screening of tuberculosis in adolescents in close contact with tuberculosis TB patients. *PLoS ONE*. 2014;9(7):e100267.
110. Song S, Jeon D, Kim JW, et al. Performance of confirmatory interferon-gamma release assays in school TB outbreaks. *Chest*. 2012;141(4):983-988.
111. Sun HY, Hsueh PR, Liu WC, et al. Risk of Active Tuberculosis in HIV-Infected Patients in Taiwan with Free Access to HIV Care and a Positive T-Spot.TB Test. *PLoS ONE*. 2015;10(5):e0125260.
112. Torres Costa J, Silva R, Ringshausen FC, Nienhaus A. Screening for tuberculosis and prediction of disease in Portuguese healthcare workers. *Journal of Occupational Medicine and Toxicology*. 2011;6:19.
113. Truong DH, Hedemark LL, Mickman JK, Mosher LB, Dietrich SE, Lowry PW. Tuberculosis among Tibetan immigrants from India and Nepal in Minnesota, 1992-1995. *JAMA*. 1997;277(9):735-738.
114. Tsou PH, Huang WC, Huang CC, et al. Quantiferon TB-Gold conversion can predict active tuberculosis development in elderly nursing home residents. *Geriatrics and gerontology international*. 2015;15(10):1179-1184.
115. Xie X, Chen JW, Li F, Tian J, Gao JS, Zhang D. A T-cell-based enzyme-linked immunospot assay for tuberculosis screening in Chinese patients with rheumatic diseases receiving infliximab therapy. *Clinical & Experimental Medicine*. 2011;11(3):155-161.
116. Yang CH, Chan PC, Liao ST, et al. Strategy to Better Select HIV-Infected Individuals for Latent TB Treatment in BCG-Vaccinated Population. *PLoS ONE*. 2013;8(8):e73069.
117. Yoshiyama T, Harada N, Higuchi K, Saitou M, Kato S. Use of the QuantiFERON-TB Gold in Tube test for screening TB contacts and predictive value for active TB. *Infectious Diseases*. 2015;47(8):542-549.
118. Yoshiyama T, Harada N, Higuchi K, Sekiya Y, Uchimura K. Use of the QuantiFERON-TB Gold test for screening tuberculosis contacts and predicting active disease. *International Journal of Tuberculosis and Lung Disease*. 2010;14(7):819-827.

119. Zellweger JP, Sotgiu G, Block M, et al. Risk Assessment of Tuberculosis in Contacts by IFN-gamma Release Assays. A Tuberculosis Network European Trials Group Study. *American Journal of Respiratory and Critical Care Medicine*. 2015;191(10):1176-1184.
120. Zenner D, Loutet MG, Harris R, Wilson S, Ormerod LP. Evaluating 17 years of latent tuberculosis infection screening in north-west England: a retrospective cohort study of reactivation. *European Respiratory Journal*. 2017;50:1602505.
121. Zhang LF, Liu XQ, Zuo LY, Li TS, Deng GH, Wang AX. Longitudinal observation of an interferon gamma-released assay (T-SPOT.TB) for Mycobacterium tuberculosis infection in AIDS patients on highly active antiretroviral therapy. *Chinese Medical Journal*. 2010;123(9):1117-1121.
122. Zhang LF, Liu XQ, Zhang Y, Deng GH, Pareek M, Lalvani A. A prospective longitudinal study evaluating a T-cell-based assay for latent tuberculosis infection in health-care workers in a general hospital in Beijing. *Chinese Medical Journal*. 2013;126(11):2039-2044.
123. Lange C, van Leth F, Sester M, TBnet. Viral Load and Risk of Tuberculosis in HIV Infection. *J Acquir Immune Defic Syndr*. 2016;71(2):e51-53. doi:10.1097/QAI.0000000000000834
